# Supplementary material for: Distinct Murine Pancreatic Transcriptomic Signatures during Chronic Pancreatitis Recovery
Source: Mediators Inflamm. 2021 May 15;2021:5595464. doi: 10.1155/2021/5595464 (PMC8158417; doi:10.1155/2021/5595464)
Supplement: Supplementary 1 — Supplementary Table S1: a complete list of all identified DEGs. [file 5595464.f1.xls]

## Sheet: summary.txt
Table S1. Summary of identified DEGs
Group 1	Group 2	ID	Name	Higher in	Log_2 Fold Change	p	FDR	nLog_10 p	nLog_10 FDR
CONR	CPR	ENSMUSG00000100001.1	1810007D17Rik	CONR	3.41959	2.49483e-61	3.20635e-57	60.603	56.494
CONR	CPR	ENSMUSG00000042254.14	Cilp	CPR	3.24	5.96446e-38	3.83276e-34	37.2244	33.4165
CONR	CPR	ENSMUSG00000045667.14	Smtnl2	CONR	2.83578	3.61429e-30	1.54836e-26	29.442	25.8101
CONR	CPR	ENSMUSG00000024907.6	Gal	CONR	2.04896	4.75893e-27	1.52904e-23	26.3225	22.8156
CONR	CPR	ENSMUSG00000019762.4	Iyd	CONR	2.32418	5.65642e-25	1.45393e-21	24.2475	20.8375
CONR	CPR	ENSMUSG00000036570.14	Fxyd1	CONR	2.0152	4.84303e-21	1.03738e-17	20.3149	16.9841
CONR	CPR	ENSMUSG00000081506.1	Amy2-ps1	CONR	2.98305	1.77276e-19	3.25479e-16	18.7513	15.4875
CONR	CPR	ENSMUSG00000069132.3	Nxph2	CONR	3.01942	8.13874e-18	1.30749e-14	17.0894	13.8836
CONR	CPR	ENSMUSG00000020581.11	Agr2	CPR	2.86236	3.41466e-16	4.87614e-13	15.4667	12.3119
CONR	CPR	ENSMUSG00000029309.7	Sparcl1	CPR	1.25875	8.20429e-16	1.05442e-12	15.086	11.977
CONR	CPR	ENSMUSG00000022871.12	Fetub	CPR	2.42864	2.33873e-15	2.73248e-12	14.631	11.5634
CONR	CPR	ENSMUSG00000057897.14	Camk2b	CONR	1.46018	3.65938e-15	3.91919e-12	14.4366	11.4068
CONR	CPR	ENSMUSG00000031375.17	Bgn	CPR	1.04021	1.93287e-14	1.91086e-11	13.7138	10.7188
CONR	CPR	ENSMUSG00000023987.14	Pgc	CPR	2.72142	2.96813e-14	2.72474e-11	13.5275	10.5647
CONR	CPR	ENSMUSG00000031548.7	Sfrp1	CPR	1.86649	4.87225e-14	4.17454e-11	13.3123	10.3794
CONR	CPR	ENSMUSG00000066720.6	Cldn9	CONR	2.14571	7.73612e-13	6.21404e-10	12.1115	9.20663
CONR	CPR	ENSMUSG00000020810.5	Cygb	CPR	1.38837	1.85536e-12	1.40265e-09	11.7316	8.85305
CONR	CPR	ENSMUSG00000021943.6	Gdf10	CPR	1.63475	2.12041e-12	1.51397e-09	11.6736	8.81988
CONR	CPR	ENSMUSG00000028927.6	Padi2	CONR	1.1894	5.171e-12	3.49778e-09	11.2864	8.45621
CONR	CPR	ENSMUSG00000078520.3	Cela3a	CONR	1.97717	1.92641e-11	1.20492e-08	10.7153	7.91904
CONR	CPR	ENSMUSG00000062609.13	Kcnj15	CPR	2.3279	1.96882e-11	1.20492e-08	10.7058	7.91904
CONR	CPR	ENSMUSG00000055632.17	Hmcn2	CPR	1.59628	5.85383e-11	3.4197e-08	10.2326	7.46601
CONR	CPR	ENSMUSG00000032500.10	Dclk3	CONR	2.053	1.10954e-10	6.19989e-08	9.95486	7.20762
CONR	CPR	ENSMUSG00000057103.10	Nat8f1	CONR	1.20104	3.70343e-10	1.98318e-07	9.4314	6.70264
CONR	CPR	ENSMUSG00000034918.8	Cdhr2	CONR	1.82677	4.67212e-10	2.40184e-07	9.33049	6.61946
CONR	CPR	ENSMUSG00000021922.15	Itih4	CONR	1.24756	3.01233e-09	1.4272e-06	8.5211	5.84551
CONR	CPR	ENSMUSG00000029675.12	Eln	CPR	1.13298	3.10938e-09	1.4272e-06	8.50733	5.84551
CONR	CPR	ENSMUSG00000030218.2	Mgp	CPR	1.21805	4.83434e-09	2.07103e-06	8.31566	5.68381
CONR	CPR	ENSMUSG00000026712.3	Mrc1	CPR	1.10535	5.60221e-09	2.32257e-06	8.25164	5.63403
CONR	CPR	ENSMUSG00000046480.6	Scn4b	CONR	1.46242	1.73089e-08	6.74101e-06	7.76173	5.17127
CONR	CPR	ENSMUSG00000031896.7	Ctrl	CONR	1.04333	1.97847e-08	7.26251e-06	7.70367	5.13891
CONR	CPR	ENSMUSG00000040127.13	Sdr9c7	CONR	1.07364	2.02796e-08	7.26251e-06	7.69294	5.13891
CONR	CPR	ENSMUSG00000031170.14	Slc38a5	CONR	1.18386	2.03432e-08	7.26251e-06	7.69158	5.13891
CONR	CPR	ENSMUSG00000029838.11	Ptn	CPR	1.66847	2.2382e-08	7.77441e-06	7.6501	5.10933
CONR	CPR	ENSMUSG00000016024.9	Lbp	CPR	1.53686	3.23872e-08	9.94722e-06	7.48963	5.0023
CONR	CPR	ENSMUSG00000042286.13	Stab1	CPR	1.00959	5.28795e-08	1.54456e-05	7.27671	4.81119
CONR	CPR	ENSMUSG00000006342.15	Susd2	CONR	1.1358	7.85333e-08	2.19415e-05	7.10495	4.65873
CONR	CPR	ENSMUSG00000001123.15	Lgals9	CPR	1.01585	1.1906e-07	3.18783e-05	6.92423	4.4965
CONR	CPR	ENSMUSG00000006369.14	Fbln1	CPR	1.11005	1.65186e-07	4.24594e-05	6.78203	4.37203
CONR	CPR	ENSMUSG00000006800.13	Sulf2	CPR	1.03762	2.09191e-07	5.2716e-05	6.67946	4.27806
CONR	CPR	ENSMUSG00000022371.15	Col14a1	CPR	1.00218	2.42777e-07	6.00032e-05	6.61479	4.22183
CONR	CPR	ENSMUSG00000020363.6	Gfpt2	CPR	1.17177	2.71181e-07	6.45412e-05	6.56674	4.19016
CONR	CPR	ENSMUSG00000026697.10	Myoc	CPR	1.79917	3.00331e-07	7.01791e-05	6.5224	4.15379
CONR	CPR	ENSMUSG00000017344.4	Vtn	CONR	1.04701	3.18809e-07	7.18831e-05	6.49647	4.14337
CONR	CPR	ENSMUSG00000003477.5	Inmt	CPR	1.49445	3.53993e-07	7.844e-05	6.45101	4.10546
CONR	CPR	ENSMUSG00000026131.18	Dst	CPR	1.13624	4.84379e-07	0.000103754	6.31481	3.984
CONR	CPR	ENSMUSG00000027848.12	Olfml3	CPR	1.31413	5.27405e-07	0.000107591	6.27786	3.96823
CONR	CPR	ENSMUSG00000069833.12	Ahnak	CPR	1.04986	5.82683e-07	0.000115329	6.23457	3.93806
CONR	CPR	ENSMUSG00000031558.15	Slit2	CPR	1.34801	6.17716e-07	0.000118491	6.20921	3.92632
CONR	CPR	ENSMUSG00000026839.16	Upp2	CONR	1.40578	6.65722e-07	0.000125822	6.17671	3.90025
CONR	CPR	ENSMUSG00000061100.3	Retnla	CPR	1.06167	6.78183e-07	0.000126319	6.16865	3.89853
CONR	CPR	ENSMUSG00000021903.11	Galnt15	CPR	1.16808	8.87199e-07	0.000157702	6.05198	3.80216
CONR	CPR	ENSMUSG00000021994.14	Wnt5a	CPR	1.23346	8.93175e-07	0.000157702	6.04906	3.80216
CONR	CPR	ENSMUSG00000025969.15	Nrp2	CPR	1.05458	8.95758e-07	0.000157702	6.04781	3.80216
CONR	CPR	ENSMUSG00000069515.6	Lyz1	CPR	1.56239	1.06199e-06	0.000181983	5.97388	3.73997
CONR	CPR	ENSMUSG00000079539.2	Obp2b	CPR	1.72942	1.54372e-06	0.00025853	5.81143	3.58749
CONR	CPR	ENSMUSG00000078439.9	Smim24	CONR	1.22121	1.57839e-06	0.00026007	5.80179	3.58491
CONR	CPR	ENSMUSG00000084939.2	Gm830	CPR	1.71859	1.65401e-06	0.000268139	5.78146	3.57164
CONR	CPR	ENSMUSG00000032186.15	Tmod2	CPR	1.24236	1.66909e-06	0.000268139	5.77752	3.57164
CONR	CPR	ENSMUSG00000040339.10	Fam102b	CPR	1.10024	2.00412e-06	0.000317987	5.69808	3.49759
CONR	CPR	ENSMUSG00000071517.6	Gm10334	CPR	1.1943	2.49121e-06	0.000390451	5.60359	3.40843
CONR	CPR	ENSMUSG00000030862.13	Cpxm2	CPR	1.49644	2.53004e-06	0.000391759	5.59687	3.40698
CONR	CPR	ENSMUSG00000037813.13	D630003M21Rik	CPR	1.51914	2.80959e-06	0.00042481	5.55136	3.37181
CONR	CPR	ENSMUSG00000029126.7	Nsg1	CONR	1.29939	2.98407e-06	0.000445944	5.52519	3.35072
CONR	CPR	ENSMUSG00000006930.15	Hap1	CPR	1.21584	3.0407e-06	0.000449184	5.51703	3.34758
CONR	CPR	ENSMUSG00000071521.4	Try10	CONR	1.00781	3.49464e-06	0.000499034	5.4566	3.30187
CONR	CPR	ENSMUSG00000026655.14	Fam107b	CPR	1.38235	4.17456e-06	0.000558869	5.37939	3.25269
CONR	CPR	ENSMUSG00000021702.7	Thbs4	CPR	1.65118	4.28149e-06	0.000567276	5.3684	3.24621
CONR	CPR	ENSMUSG00000010911.12	Apip	CONR	1.02775	4.63991e-06	0.000602344	5.33349	3.22016
CONR	CPR	ENSMUSG00000029727.7	Cyp3a13	CONR	1.28108	5.6234e-06	0.00069377	5.25	3.15878
CONR	CPR	ENSMUSG00000032925.16	Itgbl1	CPR	1.32379	5.65754e-06	0.00069377	5.24737	3.15878
CONR	CPR	ENSMUSG00000040852.5	Plekhh2	CPR	1.40188	5.66805e-06	0.00069377	5.24657	3.15878
CONR	CPR	ENSMUSG00000050721.9	Plekho2	CPR	1.15205	6.7636e-06	0.000790234	5.16982	3.10224
CONR	CPR	ENSMUSG00000031595.9	Pdgfrl	CPR	1.60902	7.8325e-06	0.000906876	5.1061	3.04245
CONR	CPR	ENSMUSG00000028664.14	Ephb2	CPR	1.39624	1.357e-05	0.00144134	4.86742	2.84123
CONR	CPR	ENSMUSG00000025986.6	Slc39a10	CPR	1.14243	1.47722e-05	0.00153106	4.83056	2.81501
CONR	CPR	ENSMUSG00000030827.5	Fgf21	CONR	1.21528	1.52375e-05	0.00155422	4.81709	2.80849
CONR	CPR	ENSMUSG00000049103.14	Ccr2	CPR	1.20957	1.65266e-05	0.00164651	4.78182	2.78343
CONR	CPR	ENSMUSG00000042436.12	Mfap4	CPR	1.22495	1.78881e-05	0.00175494	4.74744	2.75574
CONR	CPR	ENSMUSG00000066842.18	Hmcn1	CPR	1.40252	2.04567e-05	0.00193315	4.68917	2.71373
CONR	CPR	ENSMUSG00000062751.5	Prss1	CPR	1.10252	2.25165e-05	0.00208413	4.6475	2.68107
CONR	CPR	ENSMUSG00000021556.11	Golm1	CPR	1.12883	2.35671e-05	0.00214812	4.62769	2.66794
CONR	CPR	ENSMUSG00000032374.14	Plod2	CPR	1.42618	2.49024e-05	0.00220721	4.60376	2.65616
CONR	CPR	ENSMUSG00000043795.9	Prr33	CPR	1.38909	2.66669e-05	0.00234742	4.57403	2.62941
CONR	CPR	ENSMUSG00000039126.9	Prune2	CPR	1.26104	3.65656e-05	0.00307151	4.43693	2.51265
CONR	CPR	ENSMUSG00000004473.10	Clec11a	CONR	1.04897	3.78234e-05	0.00315259	4.42224	2.50133
CONR	CPR	ENSMUSG00000027955.16	Gask1b	CPR	1.05914	4.34117e-05	0.00348704	4.36239	2.45754
CONR	CPR	ENSMUSG00000021390.6	Ogn	CPR	1.07911	4.37991e-05	0.00349631	4.35853	2.45639
CONR	CPR	ENSMUSG00000026825.17	Dnm1	CPR	1.1581	4.63401e-05	0.00365376	4.33404	2.43726
CONR	CPR	ENSMUSG00000024420.8	Zfp521	CPR	1.29401	5.04664e-05	0.00381526	4.297	2.41848
CONR	CPR	ENSMUSG00000079105.3	C7	CPR	1.25548	5.71022e-05	0.00412291	4.24335	2.3848
CONR	CPR	ENSMUSG00000055368.14	Slc6a2	CPR	1.40057	6.04755e-05	0.00421206	4.21842	2.37551
CONR	CPR	ENSMUSG00000052504.6	Epha3	CPR	1.3221	6.06311e-05	0.00421206	4.2173	2.37551
CONR	CPR	ENSMUSG00000010175.13	Prox1	CPR	1.15745	6.43602e-05	0.00439977	4.19138	2.35657
CONR	CPR	ENSMUSG00000073490.11	Ifi207	CPR	1.09658	6.54906e-05	0.00445336	4.18382	2.35131
CONR	CPR	ENSMUSG00000020838.12	Slc6a4	CONR	1.34341	7.2825e-05	0.00487472	4.13772	2.31205
CONR	CPR	ENSMUSG00000090523.2	Gypc	CPR	1.25331	9.66828e-05	0.00612102	4.01465	2.21318
CONR	CPR	ENSMUSG00000024713.15	Pcsk5	CPR	1.1976	0.00013795	0.00798616	3.86028	2.09766
CONR	CPR	ENSMUSG00000091243.1	Vgll3	CPR	1.17632	0.000145067	0.00821325	3.83843	2.08549
CONR	CPR	ENSMUSG00000021567.15	Nkd2	CPR	1.35538	0.000149586	0.00832243	3.82511	2.07975
CONR	CPR	ENSMUSG00000027695.16	Pld1	CPR	1.11757	0.000163258	0.00889064	3.78713	2.05107
CONR	CPR	ENSMUSG00000037995.15	Igsf9	CPR	1.30611	0.000168916	0.00907088	3.77233	2.04235
CONR	CPR	ENSMUSG00000058099.15	Nfam1	CPR	1.12069	0.000169391	0.00907088	3.77111	2.04235
CONR	CPR	ENSMUSG00000022754.5	Tmem45a	CPR	1.23379	0.000182246	0.00967863	3.73934	2.01419
CONR	CPR	ENSMUSG00000034416.18	Pkd1l2	CONR	1.04347	0.000185624	0.00977723	3.73136	2.00978
CONR	CPR	ENSMUSG00000048078.16	Tenm4	CPR	1.01746	0.000214648	0.0104607	3.66827	1.98044
CONR	CPR	ENSMUSG00000042453.14	Reln	CPR	1.07757	0.000226188	0.0107256	3.64553	1.96958
CONR	CPR	ENSMUSG00000002266.17	Zim1	CPR	1.21258	0.000228021	0.0107256	3.64203	1.96958
CONR	CPR	ENSMUSG00000015852.13	Fcrls	CPR	1.00032	0.000228877	0.0107256	3.6404	1.96958
CONR	CPR	ENSMUSG00000027887.11	Sypl2	CONR	1.07756	0.000230335	0.0107256	3.63764	1.96958
CONR	CPR	ENSMUSG00000074415.12	3110039I08Rik	CPR	1.14739	0.000234096	0.0108223	3.63061	1.96568
CONR	CPR	ENSMUSG00000001270.9	Ckb	CPR	1.00446	0.000238798	0.0109218	3.62197	1.96171
CONR	CPR	ENSMUSG00000030584.14	Dpf1	CONR	1.11792	0.000276965	0.0122322	3.55757	1.9125
CONR	CPR	ENSMUSG00000056174.8	Col8a2	CPR	1.221	0.0002872	0.0125547	3.54182	1.90119
CONR	CPR	ENSMUSG00000024679.10	Ms4a6d	CPR	1.29173	0.000303768	0.0128422	3.51746	1.89136
CONR	CPR	ENSMUSG00000053158.10	Fes	CPR	1.03249	0.000338086	0.0138821	3.47097	1.85755
CONR	CPR	ENSMUSG00000023467.18	Tulp2	CONR	1.26796	0.00036301	0.014311	3.44008	1.84433
CONR	CPR	ENSMUSG00000051331.15	Cacna1c	CPR	1.09342	0.000370582	0.0145303	3.43112	1.83773
CONR	CPR	ENSMUSG00000066800.11	Rnasel	CPR	1.10955	0.000378634	0.0147702	3.42178	1.83061
CONR	CPR	ENSMUSG00000085042.8	Abhd11os	CONR	1.15298	0.000387359	0.0149725	3.41189	1.82471
CONR	CPR	ENSMUSG00000032010.15	Usp2	CONR	1.09645	0.000395557	0.0151629	3.40279	1.81922
CONR	CPR	ENSMUSG00000056978.8	Hamp2	CONR	1.18303	0.000431064	0.0160117	3.36546	1.79556
CONR	CPR	ENSMUSG00000000120.6	Ngfr	CPR	1.24234	0.000435981	0.0161402	3.36053	1.79209
CONR	CPR	ENSMUSG00000047230.6	Cldn2	CPR	1.24398	0.00046416	0.0169954	3.33333	1.76967
CONR	CPR	ENSMUSG00000041741.10	Pde3a	CPR	1.04474	0.000495109	0.0177246	3.3053	1.75142
CONR	CPR	ENSMUSG00000025888.5	Casp1	CPR	1.23706	0.000504915	0.0179755	3.29678	1.74532
CONR	CPR	ENSMUSG00000038463.8	Olfml2b	CPR	1.00169	0.000515883	0.0182648	3.28745	1.73839
CONR	CPR	ENSMUSG00000059824.12	Dbp	CPR	1.01209	0.000539687	0.0185748	3.26786	1.73108
CONR	CPR	ENSMUSG00000041954.18	Tnfrsf18	CPR	1.23846	0.000544236	0.0186521	3.26421	1.72927
CONR	CPR	ENSMUSG00000038732.15	Mboat1	CPR	1.19334	0.000575309	0.0193392	3.2401	1.71356
CONR	CPR	ENSMUSG00000019647.16	Sema6a	CPR	1.14175	0.000576546	0.0193392	3.23917	1.71356
CONR	CPR	ENSMUSG00000020627.10	Klhl29	CPR	1.23248	0.000588751	0.0193892	3.23007	1.71244
CONR	CPR	ENSMUSG00000043017.9	Ptgir	CPR	1.09891	0.000617486	0.0199395	3.20937	1.70029
CONR	CPR	ENSMUSG00000053963.7	Stum	CPR	1.2169	0.00065519	0.0207402	3.18363	1.68319
CONR	CPR	ENSMUSG00000079516.2	Reg3a	CPR	1.21991	0.000686639	0.0214712	3.16327	1.66814
CONR	CPR	ENSMUSG00000030017.2	Reg3g	CPR	1.21493	0.000702258	0.0217419	3.1535	1.6627
CONR	CPR	ENSMUSG00000041220.10	Elovl6	CPR	1.05779	0.000723534	0.0220876	3.14054	1.65585
CONR	CPR	ENSMUSG00000026536.9	Ifi211	CPR	1.16442	0.000741574	0.0224781	3.12985	1.64824
CONR	CPR	ENSMUSG00000025255.18	Zfhx4	CPR	1.05734	0.000810697	0.0237879	3.09114	1.62364
CONR	CPR	ENSMUSG00000050192.8	Eif5a2	CPR	1.18392	0.00094086	0.0262868	3.02648	1.58026
CONR	CPR	ENSMUSG00000027239.14	Mdk	CPR	1.14447	0.000964641	0.0267535	3.01563	1.57262
CONR	CPR	ENSMUSG00000033361.13	Prrg3	CPR	1.02302	0.000968162	0.0267588	3.01405	1.57253
CONR	CPR	ENSMUSG00000041482.16	Piezo2	CPR	1.03689	0.00098442	0.0270269	3.00682	1.5682
CONR	CPR	ENSMUSG00000028525.16	Pde4b	CPR	1.08199	0.00104164	0.0277422	2.98228	1.55686
CONR	CPR	ENSMUSG00000063160.12	Numbl	CPR	1.02779	0.00114016	0.0294953	2.94304	1.53025
CONR	CPR	ENSMUSG00000023140.4	Reg2	CPR	1.16522	0.00119865	0.0305049	2.92131	1.51563
CONR	CPR	ENSMUSG00000061535.11	C1qtnf7	CPR	1.08313	0.00130709	0.0323674	2.8837	1.48989
CONR	CPR	ENSMUSG00000025407.7	Gli1	CPR	1.06815	0.00135277	0.0331791	2.86878	1.47914
CONR	CPR	ENSMUSG00000034041.4	Lyl1	CPR	1.06565	0.00163313	0.0373446	2.78698	1.42777
CONR	CPR	ENSMUSG00000050556.9	Kcnb1	CPR	1.02331	0.00164252	0.0373446	2.78449	1.42777
CONR	CPR	ENSMUSG00000041112.16	Elmo1	CPR	1.04905	0.00164338	0.0373446	2.78426	1.42777
CONR	CPR	ENSMUSG00000037664.13	Cdkn1c	CPR	1.04745	0.00171801	0.0378676	2.76497	1.42173
CONR	CPR	ENSMUSG00000110206.1	Flt3l	CPR	1.10395	0.00174612	0.0381651	2.75793	1.41833
CONR	CPR	ENSMUSG00000037892.13	Pcdh18	CPR	1.02661	0.00186803	0.0398243	2.72862	1.39985
CONR	CPR	ENSMUSG00000035126.19	Wdr78	CPR	1.10509	0.00195571	0.0410418	2.7087	1.38677
CONR	CPR	ENSMUSG00000028337.14	Coro2a	CPR	1.11041	0.00201679	0.0416069	2.69534	1.38083
CONR	CPR	ENSMUSG00000072596.4	Ear2	CPR	1.08224	0.00220299	0.0439735	2.65699	1.35681
CONR	CPR	ENSMUSG00000000739.14	Sult5a1	CPR	1.08761	0.00237973	0.0461301	2.62347	1.33602
CONR	CPR	ENSMUSG00000032122.15	Slc37a2	CPR	1.05174	0.00240875	0.0464127	2.61821	1.33336
CONR	CPR	ENSMUSG00000000805.18	Car4	CONR	1.06984	0.00247911	0.047413	2.6057	1.3241
CONR	CPR	ENSMUSG00000023913.17	Pla2g7	CPR	1.03429	0.00255333	0.0484003	2.59289	1.31515
CONR	CPR	ENSMUSG00000024672.11	Ms4a7	CPR	1.02694	0.00261946	0.0491463	2.58179	1.30851
CONR	CPR	ENSMUSG00000026207.16	Speg	CPR	1.06696	0.00263312	0.0493253	2.57953	1.30693
CONR	CPR	ENSMUSG00000031387.14	Renbp	CPR	1.03366	0.00264213	0.0493253	2.57805	1.30693
CONR	CPR	ENSMUSG00000030562.17	Nox4	CPR	1.07539	0.00264435	0.0493253	2.57768	1.30693
CONR	CPR	ENSMUSG00000040265.16	Dnm3	CPR	1.06313	0.00267831	0.0494563	2.57214	1.30578
CONR	CP	ENSMUSG00000096525.2	Gm2663	CP	9.23737	2.17929e-189	4.16049e-185	100	100
CONR	CP	ENSMUSG00000004821.1	Tmed11	CONR	5.031	9.18862e-172	8.771e-168	100	100
CONR	CP	ENSMUSG00000094808.2	1810009J06Rik	CP	9.35162	8.47705e-135	5.39451e-131	100	100
CONR	CP	ENSMUSG00000024907.6	Gal	CONR	7.43775	5.0741e-129	2.42174e-125	100	100
CONR	CP	ENSMUSG00000100001.1	1810007D17Rik	CONR	7.43973	1.03969e-111	3.96976e-108	100	100
CONR	CP	ENSMUSG00000046008.7	Pnlip	CONR	4.63098	8.58322e-101	2.73104e-97	100	96.5637
CONR	CP	ENSMUSG00000023031.7	Cela1	CONR	4.23033	5.72632e-86	1.56173e-82	85.2421	81.8064
CONR	CP	ENSMUSG00000110086.1	Gm45623	CONR	5.41916	4.28314e-85	1.02212e-81	84.3682	80.9905
CONR	CP	ENSMUSG00000057163.3	Prss2	CONR	4.23997	1.66424e-80	3.53023e-77	79.7788	76.4522
CONR	CP	ENSMUSG00000039661.14	Dusp26	CONR	3.87824	5.04443e-79	9.63031e-76	78.2972	75.0164
CONR	CP	ENSMUSG00000031896.7	Ctrl	CONR	4.25341	6.90718e-78	1.19877e-74	77.1607	73.9213
CONR	CP	ENSMUSG00000035896.4	Rnase1	CONR	4.29629	1.07165e-77	1.70491e-74	76.9699	73.7683
CONR	CP	ENSMUSG00000062751.5	Prss1	CP	6.46436	4.24165e-77	6.22903e-74	76.3725	73.2056
CONR	CP	ENSMUSG00000054446.8	Cpa1	CONR	4.17203	5.06703e-66	6.90962e-63	65.2952	62.1605
CONR	CP	ENSMUSG00000062478.16	Ctrc	CONR	3.61333	3.11215e-60	3.96094e-57	59.5069	56.4022
CONR	CP	ENSMUSG00000024225.4	Clps	CONR	3.28877	5.64833e-59	6.73951e-56	58.2481	55.1714
CONR	CP	ENSMUSG00000030428.16	Ttyh1	CONR	3.55963	1.03046e-56	1.1572e-53	55.987	52.9366
CONR	CP	ENSMUSG00000021922.15	Itih4	CONR	4.21153	4.47789e-56	4.7493e-53	55.3489	52.3234
CONR	CP	ENSMUSG00000047517.11	Dmbt1	CONR	4.08522	1.06532e-54	1.07042e-51	53.9725	50.9704
CONR	CP	ENSMUSG00000035237.7	Lcat	CONR	4.30691	7.71932e-54	7.36848e-51	53.1124	50.1326
CONR	CP	ENSMUSG00000101088.6	1810018F18Rik	CONR	4.00407	5.92044e-53	5.38224e-50	52.2276	49.269
CONR	CP	ENSMUSG00000071517.6	Gm10334	CP	5.70542	1.65744e-52	1.43828e-49	51.7806	48.8422
CONR	CP	ENSMUSG00000058579.5	Cela2a	CONR	4.28689	1.92526e-51	1.59805e-48	50.7155	47.7964
CONR	CP	ENSMUSG00000066512.3	Klk1b5	CONR	4.19535	1.84709e-50	1.46928e-47	49.7335	46.8329
CONR	CP	ENSMUSG00000031170.14	Slc38a5	CONR	4.09205	2.80467e-49	2.14176e-46	48.5521	45.6692
CONR	CP	ENSMUSG00000074264.12	Amy1	CONR	3.34396	1.72477e-48	1.26645e-45	47.7633	44.8974
CONR	CP	ENSMUSG00000068341.8	Reg3d	CONR	2.43318	6.02993e-48	4.26361e-45	47.2197	44.3702
CONR	CP	ENSMUSG00000031375.17	Bgn	CP	2.05923	7.31996e-47	4.9909e-44	46.1355	43.3018
CONR	CP	ENSMUSG00000030954.10	Gp2	CONR	3.79429	8.39685e-47	5.52774e-44	46.0759	43.2575
CONR	CP	ENSMUSG00000042115.4	Klhdc8a	CONR	3.64682	7.83375e-45	4.98514e-42	44.106	41.3023
CONR	CP	ENSMUSG00000023433.8	Cela3b	CONR	3.25784	2.00397e-44	1.23412e-41	43.6981	40.9086
CONR	CP	ENSMUSG00000029522.12	Pla2g1b	CONR	3.55573	2.08101e-44	1.24152e-41	43.6817	40.906
CONR	CP	ENSMUSG00000024039.14	Cbs	CONR	3.29548	2.84478e-44	1.64575e-41	43.546	40.7836
CONR	CP	ENSMUSG00000049350.6	Zg16	CONR	3.52009	4.87095e-44	2.73504e-41	43.3124	40.563
CONR	CP	ENSMUSG00000034528.15	Hsd17b13	CONR	3.24402	8.11369e-44	4.42567e-41	43.0908	40.354
CONR	CP	ENSMUSG00000081506.1	Amy2-ps1	CONR	8.20018	2.7741e-43	1.47112e-40	42.5569	39.8324
CONR	CP	ENSMUSG00000030796.17	Tead2	CONR	2.77691	9.90607e-42	5.11126e-39	41.0041	38.2915
CONR	CP	ENSMUSG00000025091.3	Pnliprp2	CONR	2.97328	1.37683e-40	6.91712e-38	39.8611	37.1601
CONR	CP	ENSMUSG00000053046.15	Brsk2	CONR	3.02155	1.93346e-40	9.28104e-38	39.7137	37.0324
CONR	CP	ENSMUSG00000022270.15	Retreg1	CONR	2.66319	1.94459e-40	9.28104e-38	39.7112	37.0324
CONR	CP	ENSMUSG00000002769.8	Gnmt	CONR	3.40858	3.71626e-40	1.73042e-37	39.4299	36.7618
CONR	CP	ENSMUSG00000057103.10	Nat8f1	CONR	2.90319	2.59718e-39	1.18054e-36	38.5855	35.9279
CONR	CP	ENSMUSG00000066720.6	Cldn9	CONR	4.61844	7.64495e-39	3.39418e-36	38.1166	35.4693
CONR	CP	ENSMUSG00000059824.12	Dbp	CP	3.673	2.16876e-38	9.40995e-36	37.6638	35.0264
CONR	CP	ENSMUSG00000024028.7	Tff2	CONR	3.35669	3.03208e-38	1.28634e-35	37.5183	34.8906
CONR	CP	ENSMUSG00000090062.1	Galnt6os	CONR	3.17678	5.94951e-38	2.46918e-35	37.2255	34.6074
CONR	CP	ENSMUSG00000021190.14	Lgmn	CP	2.54492	7.10612e-38	2.88645e-35	37.1484	34.5396
CONR	CP	ENSMUSG00000036446.5	Lum	CP	2.80316	2.369e-37	9.42221e-35	36.6254	34.0258
CONR	CP	ENSMUSG00000039878.13	Slc39a5	CONR	2.70018	3.1908e-37	1.24317e-34	36.4961	33.9055
CONR	CP	ENSMUSG00000029882.5	2210010C04Rik	CONR	3.5028	3.9237e-37	1.49815e-34	36.4063	33.8244
CONR	CP	ENSMUSG00000026818.5	Cel	CONR	3.72447	5.04524e-37	1.8886e-34	36.2971	33.7239
CONR	CP	ENSMUSG00000030104.9	Edem1	CONR	2.62175	1.57832e-36	5.79455e-34	35.8018	33.237
CONR	CP	ENSMUSG00000011463.5	Cpb1	CONR	3.18646	3.19446e-36	1.15067e-33	35.4956	32.9391
CONR	CP	ENSMUSG00000028836.14	Slc30a2	CONR	2.74445	1.25281e-35	4.42914e-33	34.9021	32.3537
CONR	CP	ENSMUSG00000027007.16	Itprid2	CONR	2.60347	1.7918e-35	6.21951e-33	34.7467	32.2062
CONR	CP	ENSMUSG00000029695.13	Aass	CONR	3.17884	2.11823e-35	7.22127e-33	34.674	32.1414
CONR	CP	ENSMUSG00000029335.5	Bmp3	CONR	2.51389	8.73959e-35	2.92715e-32	34.0585	31.5336
CONR	CP	ENSMUSG00000072640.11	Lyrm9	CP	1.93458	1.15289e-34	3.79479e-32	33.9382	31.4208
CONR	CP	ENSMUSG00000057069.7	Ero1lb	CONR	2.86982	1.15896e-33	3.75011e-31	32.9359	30.426
CONR	CP	ENSMUSG00000019762.4	Iyd	CONR	4.09762	1.3477e-33	4.28815e-31	32.8704	30.3677
CONR	CP	ENSMUSG00000021266.16	Wars	CP	2.19656	1.38412e-33	4.33183e-31	32.8588	30.3633
CONR	CP	ENSMUSG00000028927.6	Padi2	CONR	2.94288	2.85183e-33	8.69633e-31	32.5449	30.0607
CONR	CP	ENSMUSG00000058119.6	Gm5771	CP	3.55352	2.86978e-33	8.69633e-31	32.5422	30.0607
CONR	CP	ENSMUSG00000084174.3	Sycn	CONR	4.11804	3.43537e-33	1.02476e-30	32.464	29.9894
CONR	CP	ENSMUSG00000036169.6	Sostdc1	CONR	2.60975	8.41862e-33	2.47261e-30	32.0748	29.6068
CONR	CP	ENSMUSG00000071553.10	Cpa2	CONR	3.13071	9.50485e-33	2.74935e-30	32.0221	29.5608
CONR	CP	ENSMUSG00000021701.7	Plk2	CONR	2.46524	9.69644e-33	2.76291e-30	32.0134	29.5586
CONR	CP	ENSMUSG00000038738.15	Shank1	CONR	3.48387	1.91097e-32	5.36504e-30	31.7187	29.2704
CONR	CP	ENSMUSG00000036381.13	P2ry14	CP	2.32396	3.21215e-32	8.88741e-30	31.4932	29.0512
CONR	CP	ENSMUSG00000023963.9	Cyp39a1	CONR	3.13548	3.5213e-32	9.60358e-30	31.4533	29.0176
CONR	CP	ENSMUSG00000020787.14	P2rx1	CONR	2.79203	7.00747e-32	1.88422e-29	31.1544	28.7249
CONR	CP	ENSMUSG00000030827.5	Fgf21	CONR	4.60059	1.79377e-31	4.75624e-29	30.7462	28.3227
CONR	CP	ENSMUSG00000052271.7	Bhlha15	CONR	2.59607	2.06116e-31	5.39036e-29	30.6859	28.2684
CONR	CP	ENSMUSG00000074505.5	Fat3	CONR	3.7239	2.54144e-31	6.55657e-29	30.5949	28.1833
CONR	CP	ENSMUSG00000027597.15	Ahcy	CONR	2.68093	2.72879e-31	6.94603e-29	30.564	28.1583
CONR	CP	ENSMUSG00000035735.10	Dagla	CONR	3.08994	2.97033e-31	7.40131e-29	30.5272	28.1307
CONR	CP	ENSMUSG00000066515.3	Klk1b3	CONR	3.05246	2.98518e-31	7.40131e-29	30.525	28.1307
CONR	CP	ENSMUSG00000022498.16	Txndc11	CP	2.03997	8.28264e-31	2.02723e-28	30.0818	27.6931
CONR	CP	ENSMUSG00000042436.12	Mfap4	CP	3.44384	9.40705e-31	2.27329e-28	30.0265	27.6433
CONR	CP	ENSMUSG00000020964.14	Sel1l	CONR	2.97533	1.23581e-30	2.9491e-28	29.908	27.5303
CONR	CP	ENSMUSG00000058715.11	Fcer1g	CP	2.61678	1.2774e-30	3.01072e-28	29.8937	27.5213
CONR	CP	ENSMUSG00000078439.9	Smim24	CONR	4.12234	1.46724e-30	3.41599e-28	29.8335	27.4665
CONR	CP	ENSMUSG00000069132.3	Nxph2	CONR	6.70898	1.49407e-30	3.43654e-28	29.8256	27.4639
CONR	CP	ENSMUSG00000029102.9	Hgfac	CONR	2.90337	2.1967e-30	4.99253e-28	29.6582	27.3017
CONR	CP	ENSMUSG00000037157.8	Il22ra1	CONR	3.46889	3.45019e-30	7.74914e-28	29.4622	27.1107
CONR	CP	ENSMUSG00000030087.11	Klf15	CP	2.32607	3.80872e-30	8.45491e-28	29.4192	27.0729
CONR	CP	ENSMUSG00000020484.18	Xbp1	CP	2.11461	5.73224e-30	1.25786e-27	29.2417	26.9004
CONR	CP	ENSMUSG00000063713.7	Klk1b24	CONR	3.73133	1.15817e-29	2.51257e-27	28.9362	26.5999
CONR	CP	ENSMUSG00000036896.5	C1qc	CP	2.33293	1.30009e-29	2.78877e-27	28.886	26.5546
CONR	CP	ENSMUSG00000038807.18	Rap1gap2	CP	2.3626	3.82994e-29	8.12416e-27	28.4168	26.0902
CONR	CP	ENSMUSG00000033590.8	Myo5c	CONR	3.05918	6.2567e-29	1.3126e-26	28.2037	25.8819
CONR	CP	ENSMUSG00000027887.11	Sypl2	CONR	3.52912	7.94367e-29	1.6484e-26	28.1	25.7829
CONR	CP	ENSMUSG00000028708.16	Mknk1	CP	2.20263	1.20922e-28	2.48229e-26	27.9175	25.6051
CONR	CP	ENSMUSG00000031957.6	Ctrb1	CONR	2.50312	2.41494e-28	4.90463e-26	27.6171	25.3094
CONR	CP	ENSMUSG00000055116.8	Arntl	CONR	2.50424	2.97788e-28	5.98428e-26	27.5261	25.223
CONR	CP	ENSMUSG00000020150.13	Gamt	CP	2.35026	3.36325e-28	6.68831e-26	27.4732	25.1747
CONR	CP	ENSMUSG00000036887.5	C1qa	CP	2.17536	3.87713e-28	7.63075e-26	27.4115	25.1174
CONR	CP	ENSMUSG00000073987.4	Ggh	CP	2.30856	4.85759e-28	9.46289e-26	27.3136	25.024
CONR	CP	ENSMUSG00000007888.15	Crlf1	CONR	2.59521	4.91e-28	9.46836e-26	27.3089	25.0237
CONR	CP	ENSMUSG00000025813.14	Homer2	CONR	2.68767	6.04328e-28	1.15372e-25	27.2187	24.9379
CONR	CP	ENSMUSG00000027199.14	Gatm	CONR	3.06852	6.83124e-28	1.29124e-25	27.1655	24.889
CONR	CP	ENSMUSG00000011257.19	Pabpc4	CP	1.97266	7.09406e-28	1.32777e-25	27.1491	24.8769
CONR	CP	ENSMUSG00000074268.4	Amy2a5	CONR	3.38576	7.71075e-28	1.42918e-25	27.1129	24.8449
CONR	CP	ENSMUSG00000034006.16	Pqlc1	CP	1.7559	8.79519e-28	1.61451e-25	27.0558	24.792
CONR	CP	ENSMUSG00000031392.18	Irak1	CP	1.90327	9.78297e-28	1.77873e-25	27.0095	24.7499
CONR	CP	ENSMUSG00000066513.4	Klk1b4	CONR	3.02403	1.34289e-27	2.4186e-25	26.872	24.6164
CONR	CP	ENSMUSG00000044734.16	Serpinb1a	CP	1.94256	1.365e-27	2.43545e-25	26.8649	24.6134
CONR	CP	ENSMUSG00000020581.11	Agr2	CP	6.2173	3.02491e-27	5.34709e-25	26.5193	24.2719
CONR	CP	ENSMUSG00000028017.7	Egf	CONR	3.9704	3.72569e-27	6.52543e-25	26.4288	24.1854
CONR	CP	ENSMUSG00000024538.7	Ppic	CONR	2.43208	4.39066e-27	7.62019e-25	26.3575	24.118
CONR	CP	ENSMUSG00000094872.1	Igkv9-120	CP	6.48901	5.33044e-27	9.16788e-25	26.2732	24.0377
CONR	CP	ENSMUSG00000042254.14	Cilp	CP	4.20413	7.56878e-27	1.29014e-24	26.121	23.8894
CONR	CP	ENSMUSG00000033350.7	Chst2	CONR	2.47452	8.65218e-27	1.46176e-24	26.0629	23.8351
CONR	CP	ENSMUSG00000044485.4	Klk1b11	CONR	3.32734	8.95411e-27	1.4995e-24	26.048	23.8241
CONR	CP	ENSMUSG00000042784.9	Muc1	CP	2.32862	1.04037e-26	1.72711e-24	25.9828	23.7627
CONR	CP	ENSMUSG00000030895.9	Hpx	CONR	3.56075	1.09046e-26	1.79465e-24	25.9624	23.746
CONR	CP	ENSMUSG00000035778.17	Ggta1	CP	1.68609	1.15881e-26	1.89085e-24	25.936	23.7233
CONR	CP	ENSMUSG00000025498.15	Irf7	CP	3.02916	1.45147e-26	2.34831e-24	25.8382	23.6292
CONR	CP	ENSMUSG00000058818.13	Pirb	CP	2.45575	2.20728e-26	3.54112e-24	25.6561	23.4509
CONR	CP	ENSMUSG00000029195.10	Klb	CONR	3.25336	2.33158e-26	3.70935e-24	25.6323	23.4307
CONR	CP	ENSMUSG00000041794.13	Myrip	CP	2.05331	2.63604e-26	4.15907e-24	25.579	23.381
CONR	CP	ENSMUSG00000020098.7	Pcbd1	CONR	2.48456	2.86424e-26	4.48207e-24	25.543	23.3485
CONR	CP	ENSMUSG00000015363.13	Trabd	CP	2.0278	3.24272e-26	5.03307e-24	25.4891	23.2982
CONR	CP	ENSMUSG00000059654.7	Reg1	CP	2.19095	4.69478e-26	7.22806e-24	25.3284	23.141
CONR	CP	ENSMUSG00000045896.14	Paip2b	CP	2.04298	5.434e-26	8.29924e-24	25.2649	23.081
CONR	CP	ENSMUSG00000029675.12	Eln	CP	2.41838	7.71431e-26	1.16884e-23	25.1127	22.9322
CONR	CP	ENSMUSG00000025762.14	Larp1b	CP	2.00236	9.30338e-26	1.39851e-23	25.0314	22.8543
CONR	CP	ENSMUSG00000055385.12	Rnf212	CONR	4.1524	9.68483e-26	1.44448e-23	25.0139	22.8403
CONR	CP	ENSMUSG00000003233.11	Dvl3	CP	1.98987	1.16382e-25	1.72237e-23	24.9341	22.7639
CONR	CP	ENSMUSG00000024857.16	Cabp2	CP	2.36744	1.63364e-25	2.39906e-23	24.7868	22.62
CONR	CP	ENSMUSG00000037798.6	Mat1a	CONR	3.21927	1.83863e-25	2.67948e-23	24.7355	22.5719
CONR	CP	ENSMUSG00000026489.13	Coq8a	CONR	2.42514	1.96064e-25	2.83566e-23	24.7076	22.5473
CONR	CP	ENSMUSG00000070360.5	Amy2a1	CONR	3.7654	2.93896e-25	4.21863e-23	24.5318	22.3748
CONR	CP	ENSMUSG00000083079.4	Amy2b	CONR	2.70252	5.50978e-25	7.8498e-23	24.2589	22.1051
CONR	CP	ENSMUSG00000076940.3	Iglv2	CP	4.32801	5.86768e-25	8.29777e-23	24.2315	22.081
CONR	CP	ENSMUSG00000038080.16	Kdm1b	CP	1.9869	6.415e-25	9.00506e-23	24.1928	22.0455
CONR	CP	ENSMUSG00000030088.15	Aldh1l1	CP	2.23717	6.73961e-25	9.39168e-23	24.1714	22.0273
CONR	CP	ENSMUSG00000001472.17	Tcf25	CP	1.58655	6.89391e-25	9.53708e-23	24.1615	22.0206
CONR	CP	ENSMUSG00000035226.5	Rims4	CONR	2.44447	7.4167e-25	1.01865e-22	24.1298	21.992
CONR	CP	ENSMUSG00000021978.8	Extl3	CP	2.06933	1.09649e-24	1.49522e-22	23.96	21.8253
CONR	CP	ENSMUSG00000026558.13	Uck2	CP	1.82508	1.65821e-24	2.24517e-22	23.7804	21.6488
CONR	CP	ENSMUSG00000031740.8	Mmp2	CP	2.30052	1.72848e-24	2.31311e-22	23.7623	21.6358
CONR	CP	ENSMUSG00000034139.4	Serpini2	CP	2.36627	1.73262e-24	2.31311e-22	23.7613	21.6358
CONR	CP	ENSMUSG00000015478.13	Rnf5	CP	2.02392	2.01326e-24	2.66911e-22	23.6961	21.5736
CONR	CP	ENSMUSG00000052595.6	A1cf	CONR	3.8762	2.16933e-24	2.85619e-22	23.6637	21.5442
CONR	CP	ENSMUSG00000010911.12	Apip	CONR	2.55602	2.2947e-24	3.00056e-22	23.6393	21.5228
CONR	CP	ENSMUSG00000029752.12	Asns	CONR	2.64843	3.89157e-24	5.05402e-22	23.4099	21.2964
CONR	CP	ENSMUSG00000020810.5	Cygb	CP	2.20627	5.32976e-24	6.87503e-22	23.2733	21.1627
CONR	CP	ENSMUSG00000057897.14	Camk2b	CONR	3.04508	6.76766e-24	8.67124e-22	23.1696	21.0619
CONR	CP	ENSMUSG00000001542.7	Ell2	CP	2.32091	6.85051e-24	8.71887e-22	23.1643	21.0595
CONR	CP	ENSMUSG00000018740.14	Slc25a35	CONR	2.55793	8.09992e-24	1.02408e-21	23.0915	20.9897
CONR	CP	ENSMUSG00000039168.15	Dap	CONR	2.46113	8.42031e-24	1.05758e-21	23.0747	20.9757
CONR	CP	ENSMUSG00000072596.4	Ear2	CP	3.75791	1.062e-23	1.32513e-21	22.9739	20.8777
CONR	CP	ENSMUSG00000025731.15	Mettl26	CP	2.12796	1.13681e-23	1.40927e-21	22.9443	20.851
CONR	CP	ENSMUSG00000038521.17	C1s1	CP	2.22559	1.60399e-23	1.9756e-21	22.7948	20.7043
CONR	CP	ENSMUSG00000006345.10	Ggt1	CONR	2.45032	1.62192e-23	1.98487e-21	22.79	20.7023
CONR	CP	ENSMUSG00000030219.13	Erp27	CP	2.36931	1.86495e-23	2.26776e-21	22.7293	20.6444
CONR	CP	ENSMUSG00000020780.15	Srp68	CP	1.6292	2.67467e-23	3.23178e-21	22.5727	20.4906
CONR	CP	ENSMUSG00000041920.14	Slc16a6	CP	1.90602	3.62319e-23	4.35034e-21	22.4409	20.3615
CONR	CP	ENSMUSG00000078670.3	Fam174b	CP	2.33429	3.81365e-23	4.5504e-21	22.4187	20.342
CONR	CP	ENSMUSG00000020256.14	Aldh1l2	CONR	3.03882	4.03677e-23	4.78671e-21	22.394	20.32
CONR	CP	ENSMUSG00000047797.14	Gjb1	CONR	2.67405	4.50475e-23	5.30866e-21	22.3463	20.275
CONR	CP	ENSMUSG00000035314.10	Gdpd5	CP	1.96358	4.60815e-23	5.39718e-21	22.3365	20.2678
CONR	CP	ENSMUSG00000109305.1	1810010D01Rik	CONR	2.8423	5.2424e-23	6.10261e-21	22.2805	20.2145
CONR	CP	ENSMUSG00000036278.6	Macrod1	CP	1.90053	5.39054e-23	6.23702e-21	22.2684	20.205
CONR	CP	ENSMUSG00000026574.5	Dpt	CP	2.14075	6.15584e-23	7.07959e-21	22.2107	20.15
CONR	CP	ENSMUSG00000079657.10	Rab26	CONR	2.42053	7.89636e-23	9.02691e-21	22.1026	20.0445
CONR	CP	ENSMUSG00000024150.11	Mcfd2	CP	2.18985	1.09631e-22	1.23896e-20	21.9601	19.9069
CONR	CP	ENSMUSG00000024180.13	Tmem8	CP	1.72925	1.09677e-22	1.23896e-20	21.9599	19.9069
CONR	CP	ENSMUSG00000061100.3	Retnla	CP	2.71497	1.18522e-22	1.331e-20	21.9262	19.8758
CONR	CP	ENSMUSG00000026640.12	Plxna2	CP	1.85439	1.37253e-22	1.53234e-20	21.8625	19.8146
CONR	CP	ENSMUSG00000112129.1	Pbld1	CONR	2.53472	1.46584e-22	1.627e-20	21.8339	19.7886
CONR	CP	ENSMUSG00000055172.10	C1ra	CP	2.23351	1.54897e-22	1.70933e-20	21.81	19.7672
CONR	CP	ENSMUSG00000103755.1	Gm37805	CONR	2.6791	2.14153e-22	2.34965e-20	21.6693	19.629
CONR	CP	ENSMUSG00000071454.13	Dtnb	CP	2.17469	2.43372e-22	2.65498e-20	21.6137	19.5759
CONR	CP	ENSMUSG00000062397.7	Zfp706	CP	1.6799	2.8896e-22	3.13439e-20	21.5392	19.5038
CONR	CP	ENSMUSG00000020072.15	Pbld2	CONR	2.64889	3.38385e-22	3.64978e-20	21.4706	19.4377
CONR	CP	ENSMUSG00000079442.12	St6galnac4	CP	1.72695	3.65368e-22	3.91867e-20	21.4373	19.4069
CONR	CP	ENSMUSG00000042179.5	Pnliprp1	CP	2.37958	3.70284e-22	3.94921e-20	21.4315	19.4035
CONR	CP	ENSMUSG00000034918.8	Cdhr2	CONR	4.50446	4.08912e-22	4.33696e-20	21.3884	19.3628
CONR	CP	ENSMUSG00000016024.9	Lbp	CP	2.8362	4.27287e-22	4.50682e-20	21.3693	19.3461
CONR	CP	ENSMUSG00000010601.13	Apol7a	CONR	3.10475	4.84198e-22	5.07903e-20	21.315	19.2942
CONR	CP	ENSMUSG00000041351.16	Rap1gap	CONR	2.66189	5.11528e-22	5.33638e-20	21.2911	19.2728
CONR	CP	ENSMUSG00000046402.10	Rbp1	CP	2.76502	5.24694e-22	5.44399e-20	21.2801	19.2641
CONR	CP	ENSMUSG00000022180.6	Slc7a8	CONR	2.84799	5.38093e-22	5.55283e-20	21.2691	19.2555
CONR	CP	ENSMUSG00000025876.15	Unc5a	CP	2.40578	7.06181e-22	7.24823e-20	21.1511	19.1398
CONR	CP	ENSMUSG00000025871.18	4833439L19Rik	CP	1.87246	8.30876e-22	8.48248e-20	21.0805	19.0715
CONR	CP	ENSMUSG00000032392.11	Parp16	CP	2.12653	1.43819e-21	1.46045e-19	20.8422	18.8355
CONR	CP	ENSMUSG00000013275.9	Slc41a1	CP	2.37139	1.49902e-21	1.51417e-19	20.8242	18.8198
CONR	CP	ENSMUSG00000052934.14	Fbxo31	CP	1.87794	1.83017e-21	1.83894e-19	20.7375	18.7354
CONR	CP	ENSMUSG00000022853.6	Ehhadh	CP	2.32443	1.90689e-21	1.906e-19	20.7197	18.7199
CONR	CP	ENSMUSG00000023224.12	Serping1	CP	2.17271	2.69831e-21	2.68299e-19	20.5689	18.5714
CONR	CP	ENSMUSG00000074896.3	Ifit3	CP	3.09433	2.7359e-21	2.70627e-19	20.5629	18.5676
CONR	CP	ENSMUSG00000032477.13	Cdc25a	CP	1.88222	2.89231e-21	2.84624e-19	20.5388	18.5457
CONR	CP	ENSMUSG00000048424.15	Ranbp3l	CONR	5.04333	3.47394e-21	3.40108e-19	20.4592	18.4684
CONR	CP	ENSMUSG00000055538.7	Zcchc24	CP	1.75579	3.73639e-21	3.63935e-19	20.4275	18.439
CONR	CP	ENSMUSG00000033684.14	Qsox1	CP	2.38374	3.77752e-21	3.66075e-19	20.4228	18.4364
CONR	CP	ENSMUSG00000038312.10	Edem2	CP	2.11739	3.93406e-21	3.79319e-19	20.4052	18.421
CONR	CP	ENSMUSG00000087667.8	Gm13381	CONR	3.57946	4.03235e-21	3.86842e-19	20.3944	18.4125
CONR	CP	ENSMUSG00000022324.14	Matn2	CP	2.03553	4.07186e-21	3.88679e-19	20.3902	18.4104
CONR	CP	ENSMUSG00000036905.8	C1qb	CP	2.43538	4.72241e-21	4.48535e-19	20.3258	18.3482
CONR	CP	ENSMUSG00000022371.15	Col14a1	CP	1.94475	5.69867e-21	5.38581e-19	20.2442	18.2687
CONR	CP	ENSMUSG00000053398.11	Phgdh	CP	2.18821	6.25841e-21	5.86268e-19	20.2035	18.2319
CONR	CP	ENSMUSG00000003477.5	Inmt	CP	3.1682	6.26466e-21	5.86268e-19	20.2031	18.2319
CONR	CP	ENSMUSG00000089997.1	1810020O05Rik	CONR	4.69967	6.65103e-21	6.19389e-19	20.1771	18.208
CONR	CP	ENSMUSG00000027227.7	Sord	CP	2.31378	7.21178e-21	6.6835e-19	20.142	18.175
CONR	CP	ENSMUSG00000019539.11	Rcn3	CP	2.19682	7.36893e-21	6.79614e-19	20.1326	18.1677
CONR	CP	ENSMUSG00000045091.4	Aqp12	CP	2.15051	7.56975e-21	6.94779e-19	20.1209	18.1582
CONR	CP	ENSMUSG00000100277.6	1810053B23Rik	CP	1.94911	8.16388e-21	7.45726e-19	20.0881	18.1274
CONR	CP	ENSMUSG00000054106.7	Try4	CONR	2.43978	8.86024e-21	8.0548e-19	20.0526	18.0939
CONR	CP	ENSMUSG00000001506.10	Col1a1	CP	2.33032	9.1129e-21	8.24523e-19	20.0403	18.0838
CONR	CP	ENSMUSG00000036622.15	Atp13a2	CP	1.97584	9.23065e-21	8.31238e-19	20.0348	18.0803
CONR	CP	ENSMUSG00000001424.14	Snd1	CP	1.86707	1.04162e-20	9.33592e-19	19.9823	18.0298
CONR	CP	ENSMUSG00000028278.14	Rragd	CP	2.17685	1.04919e-20	9.35985e-19	19.9791	18.0287
CONR	CP	ENSMUSG00000071604.4	Fam189a2	CP	2.13769	1.06598e-20	9.46541e-19	19.9723	18.0239
CONR	CP	ENSMUSG00000024807.17	Syvn1	CP	1.62754	1.50236e-20	1.32195e-18	19.8232	17.8788
CONR	CP	ENSMUSG00000045636.16	Mtus1	CP	1.86142	1.50261e-20	1.32195e-18	19.8232	17.8788
CONR	CP	ENSMUSG00000031239.5	Itm2a	CP	2.99646	1.6185e-20	1.41738e-18	19.7909	17.8485
CONR	CP	ENSMUSG00000022408.6	Fam83f	CP	2.15887	1.69571e-20	1.47821e-18	19.7706	17.8303
CONR	CP	ENSMUSG00000025196.4	Cpn1	CONR	2.80846	1.87901e-20	1.63055e-18	19.7261	17.7877
CONR	CP	ENSMUSG00000086818.1	Ctrcos	CONR	2.77527	2.5441e-20	2.19771e-18	19.5945	17.658
CONR	CP	ENSMUSG00000026365.15	Cfh	CP	2.17988	2.607e-20	2.2419e-18	19.5839	17.6494
CONR	CP	ENSMUSG00000001229.7	Dpp9	CP	1.72157	2.63636e-20	2.25698e-18	19.579	17.6465
CONR	CP	ENSMUSG00000036327.18	Qsox2	CP	2.35482	3.9535e-20	3.35733e-18	19.403	17.474
CONR	CP	ENSMUSG00000045983.15	Eif4g1	CP	1.51151	3.95683e-20	3.35733e-18	19.4027	17.474
CONR	CP	ENSMUSG00000037331.15	Larp1	CP	2.07479	4.0247e-20	3.3998e-18	19.3953	17.4685
CONR	CP	ENSMUSG00000056978.8	Hamp2	CONR	4.61862	4.05738e-20	3.41231e-18	19.3918	17.467
CONR	CP	ENSMUSG00000030763.7	Lcmt1	CP	1.94114	4.61318e-20	3.86273e-18	19.336	17.4131
CONR	CP	ENSMUSG00000029661.16	Col1a2	CP	2.26231	5.08054e-20	4.23549e-18	19.2941	17.3731
CONR	CP	ENSMUSG00000096464.2	Ighv2-2	CP	6.33806	5.10775e-20	4.23966e-18	19.2918	17.3727
CONR	CP	ENSMUSG00000017754.13	Pltp	CP	2.08254	5.13207e-20	4.2414e-18	19.2897	17.3725
CONR	CP	ENSMUSG00000037349.9	Nudt22	CP	2.04676	6.1356e-20	5.04891e-18	19.2121	17.2968
CONR	CP	ENSMUSG00000069516.8	Lyz2	CP	2.45219	6.28048e-20	5.12593e-18	19.202	17.2902
CONR	CP	ENSMUSG00000028270.12	Gbp2	CP	2.0808	6.2829e-20	5.12593e-18	19.2018	17.2902
CONR	CP	ENSMUSG00000040354.14	Mars	CP	1.92592	6.32942e-20	5.14191e-18	19.1986	17.2889
CONR	CP	ENSMUSG00000034667.8	Xpot	CP	1.72998	6.54812e-20	5.29704e-18	19.1839	17.276
CONR	CP	ENSMUSG00000044221.14	Grsf1	CP	1.38771	7.04724e-20	5.67674e-18	19.152	17.2459
CONR	CP	ENSMUSG00000029211.11	Gabra4	CONR	2.888	7.39873e-20	5.93484e-18	19.1308	17.2266
CONR	CP	ENSMUSG00000021737.3	Psmd6	CP	1.57517	8.38209e-20	6.6955e-18	19.0766	17.1742
CONR	CP	ENSMUSG00000019737.14	Syne4	CP	2.23346	8.95508e-20	7.12339e-18	19.0479	17.1473
CONR	CP	ENSMUSG00000036687.13	Tmem184a	CONR	2.51595	9.53502e-20	7.55324e-18	19.0207	17.1219
CONR	CP	ENSMUSG00000003420.8	Fcgrt	CP	1.99049	9.69828e-20	7.65082e-18	19.0133	17.1163
CONR	CP	ENSMUSG00000022679.13	Mpv17l	CONR	2.65238	1.03111e-19	8.10079e-18	18.9867	17.0915
CONR	CP	ENSMUSG00000006378.13	Gcat	CP	2.41703	1.08011e-19	8.45101e-18	18.9665	17.0731
CONR	CP	ENSMUSG00000022136.7	Dnajc3	CP	2.15086	1.13178e-19	8.81908e-18	18.9462	17.0546
CONR	CP	ENSMUSG00000008682.13	Rpl10	CP	1.80576	1.22589e-19	9.51361e-18	18.9115	17.0217
CONR	CP	ENSMUSG00000032083.8	Apoa1	CONR	3.28716	1.41359e-19	1.09259e-17	18.8497	16.9615
CONR	CP	ENSMUSG00000014959.12	Gorasp2	CP	1.78692	1.45978e-19	1.12374e-17	18.8357	16.9493
CONR	CP	ENSMUSG00000002985.16	Apoe	CP	2.00052	1.58916e-19	1.21842e-17	18.7988	16.9142
CONR	CP	ENSMUSG00000027333.18	Smox	CP	1.82817	1.63391e-19	1.24772e-17	18.7868	16.9039
CONR	CP	ENSMUSG00000055239.10	Kcmf1	CP	1.52301	1.70668e-19	1.2981e-17	18.7678	16.8867
CONR	CP	ENSMUSG00000034586.14	Hid1	CP	1.97302	1.78996e-19	1.35604e-17	18.7472	16.8677
CONR	CP	ENSMUSG00000010064.15	Slc38a3	CONR	2.51326	1.85398e-19	1.39899e-17	18.7319	16.8542
CONR	CP	ENSMUSG00000028542.17	Slc6a9	CONR	2.73398	1.93016e-19	1.45074e-17	18.7144	16.8384
CONR	CP	ENSMUSG00000061959.13	Ces1e	CONR	2.544	2.19832e-19	1.64581e-17	18.6579	16.7836
CONR	CP	ENSMUSG00000071656.6	Lrrn4cl	CP	2.39924	2.43597e-19	1.81661e-17	18.6133	16.7407
CONR	CP	ENSMUSG00000009185.2	Ccl8	CP	4.28928	2.91469e-19	2.16515e-17	18.5354	16.6645
CONR	CP	ENSMUSG00000023259.16	Slc26a6	CP	2.13023	3.01956e-19	2.23436e-17	18.5201	16.6508
CONR	CP	ENSMUSG00000032359.14	Ctsh	CP	1.96797	3.47081e-19	2.55835e-17	18.4596	16.592
CONR	CP	ENSMUSG00000016028.9	Celsr1	CP	1.89281	3.73461e-19	2.74221e-17	18.4278	16.5619
CONR	CP	ENSMUSG00000039057.11	Myo16	CONR	3.10814	3.91049e-19	2.86035e-17	18.4078	16.5436
CONR	CP	ENSMUSG00000078963.2	Hsbp1l1	CP	2.14049	3.97535e-19	2.8967e-17	18.4006	16.5381
CONR	CP	ENSMUSG00000008999.7	Bmp7	CONR	2.68319	4.29147e-19	3.11515e-17	18.3674	16.5065
CONR	CP	ENSMUSG00000015869.16	Prpsap1	CP	1.58863	4.44489e-19	3.21429e-17	18.3521	16.4929
CONR	CP	ENSMUSG00000031505.11	Naxd	CP	1.72488	5.33897e-19	3.84628e-17	18.2725	16.415
CONR	CP	ENSMUSG00000045667.14	Smtnl2	CONR	2.49971	5.49488e-19	3.94371e-17	18.26	16.4041
CONR	CP	ENSMUSG00000018593.13	Sparc	CP	2.2036	5.97513e-19	4.27233e-17	18.2237	16.3693
CONR	CP	ENSMUSG00000032440.13	Tgfbr2	CP	1.90272	6.24882e-19	4.45135e-17	18.2042	16.3515
CONR	CP	ENSMUSG00000029061.2	Mmp23	CP	2.29698	8.27319e-19	5.87151e-17	18.0823	16.2313
CONR	CP	ENSMUSG00000017344.4	Vtn	CONR	3.45401	8.88048e-19	6.27916e-17	18.0516	16.2021
CONR	CP	ENSMUSG00000034416.18	Pkd1l2	CONR	2.59689	1.09778e-18	7.73349e-17	17.9595	16.1116
CONR	CP	ENSMUSG00000027808.8	Serp1	CP	2.06832	1.18451e-18	8.31376e-17	17.9265	16.0802
CONR	CP	ENSMUSG00000105208.1	Gm43525	CONR	2.78864	1.24714e-18	8.72131e-17	17.9041	16.0594
CONR	CP	ENSMUSG00000038527.9	C1rl	CP	2.35693	1.43434e-18	9.99376e-17	17.8433	16.0003
CONR	CP	ENSMUSG00000027495.4	Fam210b	CP	2.02682	1.46341e-18	1.01593e-16	17.8346	15.9931
CONR	CP	ENSMUSG00000100094.1	1810008I18Rik	CONR	2.41228	1.51199e-18	1.04585e-16	17.8205	15.9805
CONR	CP	ENSMUSG00000060803.5	Gstp1	CP	2.23517	1.57303e-18	1.08414e-16	17.8033	15.9649
CONR	CP	ENSMUSG00000050705.15	2310061I04Rik	CP	1.80118	1.72419e-18	1.18405e-16	17.7634	15.9266
CONR	CP	ENSMUSG00000020634.12	Ubxn2a	CP	1.74808	1.79736e-18	1.22987e-16	17.7454	15.9101
CONR	CP	ENSMUSG00000028307.9	Aldob	CONR	3.23302	1.8975e-18	1.29376e-16	17.7218	15.8881
CONR	CP	ENSMUSG00000056553.14	Ptprn2	CONR	3.09436	2.01062e-18	1.366e-16	17.6967	15.8645
CONR	CP	ENSMUSG00000018415.14	Gid4	CP	1.45792	2.15737e-18	1.46051e-16	17.6661	15.8355
CONR	CP	ENSMUSG00000026043.18	Col3a1	CP	2.23973	2.29339e-18	1.54711e-16	17.6395	15.8105
CONR	CP	ENSMUSG00000045975.7	C2cd2	CP	1.51347	2.36791e-18	1.58898e-16	17.6256	15.7989
CONR	CP	ENSMUSG00000038463.8	Olfml2b	CP	2.56994	2.37211e-18	1.58898e-16	17.6249	15.7989
CONR	CP	ENSMUSG00000026511.7	Srp9	CP	1.87025	2.58676e-18	1.72671e-16	17.5872	15.7628
CONR	CP	ENSMUSG00000075602.10	Ly6a	CP	2.41022	2.62991e-18	1.7494e-16	17.5801	15.7571
CONR	CP	ENSMUSG00000034343.14	Ube2f	CP	1.62569	2.76056e-18	1.82992e-16	17.559	15.7376
CONR	CP	ENSMUSG00000036825.12	Ssx2ip	CONR	2.44714	3.41903e-18	2.25857e-16	17.4661	15.6462
CONR	CP	ENSMUSG00000039943.16	Plcb4	CP	1.95628	4.20889e-18	2.77076e-16	17.3758	15.5574
CONR	CP	ENSMUSG00000006800.13	Sulf2	CP	2.01527	4.27003e-18	2.79989e-16	17.3696	15.5529
CONR	CP	ENSMUSG00000031919.6	Tmed6	CP	2.38015	4.28248e-18	2.79989e-16	17.3683	15.5529
CONR	CP	ENSMUSG00000073412.6	Lst1	CP	3.8399	4.43988e-18	2.89289e-16	17.3526	15.5387
CONR	CP	ENSMUSG00000043003.14	Rasef	CONR	2.72914	4.5965e-18	2.98475e-16	17.3376	15.5251
CONR	CP	ENSMUSG00000024672.11	Ms4a7	CP	3.39208	4.97772e-18	3.22134e-16	17.303	15.492
CONR	CP	ENSMUSG00000026177.11	Slc11a1	CP	2.3198	5.61124e-18	3.61906e-16	17.2509	15.4414
CONR	CP	ENSMUSG00000085189.1	Gm11963	CONR	2.8535	6.09438e-18	3.91744e-16	17.2151	15.407
CONR	CP	ENSMUSG00000032026.7	Rexo2	CP	1.89666	7.73693e-18	4.95657e-16	17.1114	15.3048
CONR	CP	ENSMUSG00000019066.13	Rab3d	CP	2.17827	8.06992e-18	5.1526e-16	17.0931	15.288
CONR	CP	ENSMUSG00000035637.14	Grhpr	CP	1.7005	8.32937e-18	5.30053e-16	17.0794	15.2757
CONR	CP	ENSMUSG00000020051.17	Pah	CONR	3.38056	9.06453e-18	5.7492e-16	17.0427	15.2404
CONR	CP	ENSMUSG00000027239.14	Mdk	CP	3.22598	9.24436e-18	5.84385e-16	17.0341	15.2333
CONR	CP	ENSMUSG00000053644.13	Aldh7a1	CP	2.36477	9.51386e-18	5.99436e-16	17.0216	15.2223
CONR	CP	ENSMUSG00000028111.4	Ctsk	CP	2.79857	9.88912e-18	6.2103e-16	17.0048	15.2069
CONR	CP	ENSMUSG00000006649.17	Nphs1	CONR	2.75875	1.43578e-17	8.98706e-16	16.8429	15.0464
CONR	CP	ENSMUSG00000059481.4	Plg	CONR	3.52007	1.4577e-17	9.09443e-16	16.8363	15.0412
CONR	CP	ENSMUSG00000022816.11	Fstl1	CP	1.94979	1.54771e-17	9.62452e-16	16.8103	15.0166
CONR	CP	ENSMUSG00000027293.13	Ehd4	CP	1.55492	1.61632e-17	1.00186e-15	16.7915	14.9992
CONR	CP	ENSMUSG00000050931.7	Sgms2	CP	2.1094	1.70312e-17	1.05224e-15	16.7688	14.9779
CONR	CP	ENSMUSG00000057286.6	St6galnac2	CP	1.75367	1.92032e-17	1.18261e-15	16.7166	14.9272
CONR	CP	ENSMUSG00000030688.15	Stard10	CP	1.87264	1.93958e-17	1.19063e-15	16.7123	14.9242
CONR	CP	ENSMUSG00000095127.2	Ighv1-82	CP	6.14657	2.18651e-17	1.33791e-15	16.6602	14.8736
CONR	CP	ENSMUSG00000034758.12	Tle6	CP	1.77864	2.20504e-17	1.34493e-15	16.6566	14.8713
CONR	CP	ENSMUSG00000029322.12	Plac8	CP	2.92923	2.35431e-17	1.43141e-15	16.6281	14.8442
CONR	CP	ENSMUSG00000019929.16	Dcn	CP	1.99358	2.63813e-17	1.59887e-15	16.5787	14.7962
CONR	CP	ENSMUSG00000069874.7	Irgm2	CP	2.02358	2.65368e-17	1.60321e-15	16.5762	14.795
CONR	CP	ENSMUSG00000058099.15	Nfam1	CP	2.38868	2.71016e-17	1.63217e-15	16.567	14.7872
CONR	CP	ENSMUSG00000040428.19	Plekha4	CP	2.65458	2.78598e-17	1.67255e-15	16.555	14.7766
CONR	CP	ENSMUSG00000031380.10	Vegfd	CP	3.08365	3.17715e-17	1.90141e-15	16.498	14.7209
CONR	CP	ENSMUSG00000022132.15	Cldn10	CP	1.88659	3.27157e-17	1.9518e-15	16.4852	14.7096
CONR	CP	ENSMUSG00000011179.8	Odc1	CP	1.98623	3.71094e-17	2.20703e-15	16.4305	14.6562
CONR	CP	ENSMUSG00000043019.12	Edem3	CP	2.03653	4.12504e-17	2.44568e-15	16.3846	14.6116
CONR	CP	ENSMUSG00000030218.2	Mgp	CP	2.4461	4.29845e-17	2.54061e-15	16.3667	14.5951
CONR	CP	ENSMUSG00000036256.13	Igfbp7	CP	1.83649	4.50637e-17	2.65528e-15	16.3462	14.5759
CONR	CP	ENSMUSG00000005667.8	Mthfd2	CP	2.05737	4.7438e-17	2.78658e-15	16.3239	14.5549
CONR	CP	ENSMUSG00000028518.8	Prkaa2	CP	2.26827	4.80791e-17	2.81558e-15	16.318	14.5504
CONR	CP	ENSMUSG00000055653.13	Gpc3	CP	2.00127	4.88237e-17	2.84982e-15	16.3114	14.5452
CONR	CP	ENSMUSG00000022462.6	Slc38a2	CP	1.37633	4.89624e-17	2.84982e-15	16.3101	14.5452
CONR	CP	ENSMUSG00000076934.2	Iglv1	CP	3.58269	5.11686e-17	2.96918e-15	16.291	14.5274
CONR	CP	ENSMUSG00000017493.12	Igfbp4	CP	1.91673	5.17622e-17	2.99452e-15	16.286	14.5237
CONR	CP	ENSMUSG00000055435.6	Maf	CP	2.20897	5.47198e-17	3.15606e-15	16.2619	14.5009
CONR	CP	ENSMUSG00000031548.7	Sfrp1	CP	2.7705	5.9948e-17	3.44719e-15	16.2222	14.4625
CONR	CP	ENSMUSG00000059498.13	Fcgr3	CP	2.37878	6.07605e-17	3.48342e-15	16.2164	14.458
CONR	CP	ENSMUSG00000052430.15	Bmpr1b	CONR	3.6565	6.20884e-17	3.54889e-15	16.207	14.4499
CONR	CP	ENSMUSG00000024143.14	Rhoq	CP	1.23348	6.368e-17	3.629e-15	16.196	14.4402
CONR	CP	ENSMUSG00000062012.13	Zfp13	CP	2.07437	6.42517e-17	3.65068e-15	16.1921	14.4376
CONR	CP	ENSMUSG00000032042.11	Srpr	CP	1.9495	6.45922e-17	3.65914e-15	16.1898	14.4366
CONR	CP	ENSMUSG00000022868.5	Ahsg	CONR	2.7219	6.48629e-17	3.6636e-15	16.188	14.4361
CONR	CP	ENSMUSG00000050721.9	Plekho2	CP	2.2616	6.92197e-17	3.89815e-15	16.1598	14.4091
CONR	CP	ENSMUSG00000030802.14	Bckdk	CP	1.93057	7.45544e-17	4.18623e-15	16.1275	14.3782
CONR	CP	ENSMUSG00000020629.12	Adi1	CP	1.73174	7.93054e-17	4.43994e-15	16.1007	14.3526
CONR	CP	ENSMUSG00000027750.16	Postn	CP	3.53136	8.6911e-17	4.85152e-15	16.0609	14.3141
CONR	CP	ENSMUSG00000021048.7	Mthfd1	CP	1.44029	9.07707e-17	5.05219e-15	16.0421	14.2965
CONR	CP	ENSMUSG00000004891.16	Nes	CP	1.89686	9.20252e-17	5.10713e-15	16.0361	14.2918
CONR	CP	ENSMUSG00000019978.16	Epb41l2	CP	1.45677	9.86191e-17	5.45721e-15	16.006	14.263
CONR	CP	ENSMUSG00000037638.5	Zbtb42	CP	2.0082	1.07417e-16	5.92686e-15	15.9689	14.2272
CONR	CP	ENSMUSG00000006369.14	Fbln1	CP	1.98903	1.1026e-16	6.06619e-15	15.9576	14.2171
CONR	CP	ENSMUSG00000001128.7	Cfp	CP	2.1773	1.14554e-16	6.28434e-15	15.941	14.2017
CONR	CP	ENSMUSG00000024679.10	Ms4a6d	CP	3.84617	1.16534e-16	6.37465e-15	15.9335	14.1955
CONR	CP	ENSMUSG00000062760.10	Shisal1	CP	2.31758	1.1691e-16	6.37692e-15	15.9321	14.1954
CONR	CP	ENSMUSG00000029407.10	Uso1	CP	1.53674	1.27491e-16	6.93428e-15	15.8945	14.159
CONR	CP	ENSMUSG00000021238.11	Aldh6a1	CP	1.60492	1.39649e-16	7.57397e-15	15.855	14.1207
CONR	CP	ENSMUSG00000028957.12	Per3	CP	2.98288	1.43278e-16	7.74877e-15	15.8438	14.1108
CONR	CP	ENSMUSG00000024085.13	Man2a1	CP	1.46945	1.54083e-16	8.30962e-15	15.8122	14.0804
CONR	CP	ENSMUSG00000037172.14	E330009J07Rik	CP	1.92025	1.59607e-16	8.58326e-15	15.7969	14.0663
CONR	CP	ENSMUSG00000021944.15	Gata4	CONR	2.56708	1.61816e-16	8.65453e-15	15.791	14.0628
CONR	CP	ENSMUSG00000040212.12	Emp3	CP	2.21714	1.61839e-16	8.65453e-15	15.7909	14.0628
CONR	CP	ENSMUSG00000079017.3	Ifi27l2a	CP	2.78707	1.77857e-16	9.48455e-15	15.7499	14.023
CONR	CP	ENSMUSG00000037703.14	Lzts3	CP	2.14002	1.86698e-16	9.92828e-15	15.7289	14.0031
CONR	CP	ENSMUSG00000050447.15	Lypd6	CONR	3.67238	1.99725e-16	1.05915e-14	15.6996	13.975
CONR	CP	ENSMUSG00000017664.16	Slc35c2	CP	1.78603	2.15919e-16	1.14186e-14	15.6657	13.9424
CONR	CP	ENSMUSG00000030579.10	Tyrobp	CP	3.09821	2.36453e-16	1.247e-14	15.6263	13.9041
CONR	CP	ENSMUSG00000024587.9	Nars	CP	1.60258	2.37307e-16	1.24805e-14	15.6247	13.9038
CONR	CP	ENSMUSG00000027315.13	Spint1	CP	2.06117	2.52175e-16	1.32261e-14	15.5983	13.8786
CONR	CP	ENSMUSG00000029368.10	Alb	CONR	3.07385	2.56451e-16	1.34135e-14	15.591	13.8725
CONR	CP	ENSMUSG00000073418.4	C4b	CP	2.32476	2.60125e-16	1.35685e-14	15.5848	13.8675
CONR	CP	ENSMUSG00000056050.12	Mia3	CP	1.52565	2.65162e-16	1.37935e-14	15.5765	13.8603
CONR	CP	ENSMUSG00000038459.10	Abhd17c	CP	1.37798	2.8203e-16	1.46311e-14	15.5497	13.8347
CONR	CP	ENSMUSG00000001123.15	Lgals9	CP	1.68106	3.05228e-16	1.57916e-14	15.5154	13.8016
CONR	CP	ENSMUSG00000085723.2	Gm15915	CONR	2.53547	3.26045e-16	1.6823e-14	15.4867	13.7741
CONR	CP	ENSMUSG00000095571.2	Ighv5-17	CP	4.19338	3.33215e-16	1.71466e-14	15.4773	13.7658
CONR	CP	ENSMUSG00000021994.14	Wnt5a	CP	2.0187	3.46937e-16	1.78048e-14	15.4597	13.7495
CONR	CP	ENSMUSG00000031770.16	Herpud1	CP	1.8422	3.61358e-16	1.84951e-14	15.4421	13.7329
CONR	CP	ENSMUSG00000025935.10	Tram1	CP	1.70981	3.82535e-16	1.95267e-14	15.4173	13.7094
CONR	CP	ENSMUSG00000028434.12	Epb41l4b	CP	1.7815	4.07694e-16	2.07554e-14	15.3897	13.6829
CONR	CP	ENSMUSG00000087141.1	Plcxd2	CP	1.81815	4.20552e-16	2.13531e-14	15.3762	13.6705
CONR	CP	ENSMUSG00000051285.17	Pcmtd1	CP	1.80655	4.28335e-16	2.16905e-14	15.3682	13.6637
CONR	CP	ENSMUSG00000025007.13	Aldh18a1	CP	2.03887	4.30005e-16	2.17175e-14	15.3665	13.6632
CONR	CP	ENSMUSG00000049577.15	Zfpm1	CP	1.72021	4.37617e-16	2.20437e-14	15.3589	13.6567
CONR	CP	ENSMUSG00000020814.13	Mxra7	CP	1.83418	4.82439e-16	2.42375e-14	15.3166	13.6155
CONR	CP	ENSMUSG00000020609.14	Apob	CONR	3.43152	5.35441e-16	2.68297e-14	15.2713	13.5714
CONR	CP	ENSMUSG00000034459.8	Ifit1	CP	2.97749	5.40157e-16	2.69951e-14	15.2675	13.5687
CONR	CP	ENSMUSG00000040205.8	Cuzd1	CP	2.40496	5.51709e-16	2.75005e-14	15.2583	13.5607
CONR	CP	ENSMUSG00000021943.6	Gdf10	CP	2.16917	5.64283e-16	2.8054e-14	15.2485	13.552
CONR	CP	ENSMUSG00000020902.12	Ntn1	CP	1.80799	6.27292e-16	3.11056e-14	15.2025	13.5072
CONR	CP	ENSMUSG00000021000.16	Mia2	CP	1.68002	6.29303e-16	3.11244e-14	15.2011	13.5069
CONR	CP	ENSMUSG00000024420.8	Zfp521	CP	2.68142	6.33764e-16	3.12641e-14	15.1981	13.505
CONR	CP	ENSMUSG00000021684.17	Pde8b	CONR	2.50778	6.56418e-16	3.22981e-14	15.1828	13.4908
CONR	CP	ENSMUSG00000024404.6	Riok3	CP	1.21833	6.59711e-16	3.23767e-14	15.1806	13.4898
CONR	CP	ENSMUSG00000029309.7	Sparcl1	CP	2.0574	6.76635e-16	3.31221e-14	15.1696	13.4799
CONR	CP	ENSMUSG00000039953.13	Clstn1	CP	1.74031	7.28398e-16	3.55648e-14	15.1376	13.449
CONR	CP	ENSMUSG00000093861.2	Igkv1-110	CP	3.41344	7.58921e-16	3.69606e-14	15.1198	13.4323
CONR	CP	ENSMUSG00000027742.13	Cog6	CP	1.71507	7.70599e-16	3.74338e-14	15.1132	13.4267
CONR	CP	ENSMUSG00000055782.8	Abcd2	CP	2.19526	9.07318e-16	4.39635e-14	15.0422	13.3569
CONR	CP	ENSMUSG00000028494.12	Plin2	CP	1.95969	9.10127e-16	4.3988e-14	15.0409	13.3567
CONR	CP	ENSMUSG00000023913.17	Pla2g7	CP	2.93609	9.51974e-16	4.58943e-14	15.0214	13.3382
CONR	CP	ENSMUSG00000044005.13	Gls2	CONR	2.52462	9.65267e-16	4.64179e-14	15.0154	13.3333
CONR	CP	ENSMUSG00000029413.14	Naaa	CP	2.19289	1.00743e-15	4.83237e-14	14.9968	13.3158
CONR	CP	ENSMUSG00000027236.8	Eif3j1	CP	1.30939	1.19637e-15	5.72428e-14	14.9221	13.2423
CONR	CP	ENSMUSG00000024501.19	Dpysl3	CP	1.67146	1.28529e-15	6.13436e-14	14.891	13.2122
CONR	CP	ENSMUSG00000041161.8	Otud3	CP	2.11813	1.35654e-15	6.45827e-14	14.8676	13.1899
CONR	CP	ENSMUSG00000007594.10	Hapln4	CP	2.33336	1.41154e-15	6.70342e-14	14.8503	13.1737
CONR	CP	ENSMUSG00000036817.14	Sun1	CP	1.34667	1.46059e-15	6.91915e-14	14.8355	13.1599
CONR	CP	ENSMUSG00000023367.14	Tmem176a	CP	1.38149	1.46864e-15	6.94003e-14	14.8331	13.1586
CONR	CP	ENSMUSG00000007041.9	Clic1	CP	1.70889	1.69428e-15	7.98655e-14	14.771	13.0976
CONR	CP	ENSMUSG00000085510.1	Gm12082	CONR	5.4529	1.7128e-15	8.05394e-14	14.7663	13.094
CONR	CP	ENSMUSG00000094787.2	Ighv1-54	CP	5.50271	1.78026e-15	8.35061e-14	14.7495	13.0783
CONR	CP	ENSMUSG00000029193.7	Cckar	CP	2.34283	1.80917e-15	8.46543e-14	14.7425	13.0724
CONR	CP	ENSMUSG00000025732.5	Mcrip2	CP	1.74885	1.92661e-15	8.99288e-14	14.7152	13.0461
CONR	CP	ENSMUSG00000036915.17	Kirrel2	CONR	2.4246	2.04559e-15	9.52498e-14	14.6892	13.0211
CONR	CP	ENSMUSG00000029186.12	Pi4k2b	CP	2.13201	2.10973e-15	9.79974e-14	14.6758	13.0088
CONR	CP	ENSMUSG00000030861.15	Acadsb	CP	1.73611	2.2928e-15	1.06242e-13	14.6396	12.9737
CONR	CP	ENSMUSG00000031875.7	Cmtm3	CP	1.74919	2.45111e-15	1.13303e-13	14.6106	12.9458
CONR	CP	ENSMUSG00000018774.13	Cd68	CP	2.40748	2.47699e-15	1.14223e-13	14.6061	12.9422
CONR	CP	ENSMUSG00000075705.12	Msrb1	CP	1.79131	2.5435e-15	1.17007e-13	14.5946	12.9318
CONR	CP	ENSMUSG00000054452.10	Aes	CP	1.55239	2.76543e-15	1.26911e-13	14.5582	12.8965
CONR	CP	ENSMUSG00000025736.14	Jmjd8	CP	1.79685	2.8838e-15	1.32025e-13	14.54	12.8793
CONR	CP	ENSMUSG00000019122.8	Ccl9	CP	2.36911	2.97024e-15	1.35658e-13	14.5272	12.8676
CONR	CP	ENSMUSG00000056329.3	1810010K12Rik	CP	2.06144	3.05609e-15	1.39245e-13	14.5148	12.8562
CONR	CP	ENSMUSG00000074272.10	Ceacam1	CP	1.64087	3.16022e-15	1.43647e-13	14.5003	12.8427
CONR	CP	ENSMUSG00000032500.10	Dclk3	CONR	3.5638	3.27529e-15	1.48524e-13	14.4848	12.8282
CONR	CP	ENSMUSG00000032122.15	Slc37a2	CP	2.43743	3.67235e-15	1.66135e-13	14.4351	12.7795
CONR	CP	ENSMUSG00000047921.15	Trappc9	CP	1.53728	3.68402e-15	1.66269e-13	14.4337	12.7792
CONR	CP	ENSMUSG00000075701.9	Selenos	CP	1.61213	3.94887e-15	1.77801e-13	14.4035	12.7501
CONR	CP	ENSMUSG00000031668.14	Eif2ak3	CP	1.90163	4.03809e-15	1.81391e-13	14.3938	12.7414
CONR	CP	ENSMUSG00000020516.15	Rps6kb1	CP	1.37957	4.50804e-15	2.02026e-13	14.346	12.6946
CONR	CP	ENSMUSG00000053158.10	Fes	CP	2.12408	4.62516e-15	2.06575e-13	14.3349	12.6849
CONR	CP	ENSMUSG00000046480.6	Scn4b	CONR	3.13497	4.64011e-15	2.06575e-13	14.3335	12.6849
CONR	CP	ENSMUSG00000026728.9	Vim	CP	1.66808	4.64201e-15	2.06575e-13	14.3333	12.6849
CONR	CP	ENSMUSG00000049327.17	Kmt5a	CP	1.28113	5.21997e-15	2.31755e-13	14.2823	12.635
CONR	CP	ENSMUSG00000002111.8	Spi1	CP	2.70554	5.23337e-15	2.31811e-13	14.2812	12.6349
CONR	CP	ENSMUSG00000045302.13	Preb	CP	1.21778	5.2968e-15	2.34077e-13	14.276	12.6306
CONR	CP	ENSMUSG00000027746.13	Ufm1	CP	1.77675	5.34217e-15	2.35537e-13	14.2723	12.6279
CONR	CP	ENSMUSG00000029397.15	Rchy1	CP	1.43834	5.65714e-15	2.48849e-13	14.2474	12.6041
CONR	CP	ENSMUSG00000000957.9	Mmp14	CP	1.98057	5.7572e-15	2.52668e-13	14.2398	12.5974
CONR	CP	ENSMUSG00000026480.12	Ncf2	CP	2.42477	6.24943e-15	2.73642e-13	14.2042	12.5628
CONR	CP	ENSMUSG00000029775.14	Klhdc10	CP	1.56485	6.37989e-15	2.78715e-13	14.1952	12.5548
CONR	CP	ENSMUSG00000053063.11	Clec12a	CP	2.74971	6.53433e-15	2.8481e-13	14.1848	12.5454
CONR	CP	ENSMUSG00000025036.6	Sfxn2	CP	1.73134	6.61947e-15	2.87864e-13	14.1792	12.5408
CONR	CP	ENSMUSG00000103912.1	Gm33819	CONR	5.72247	6.87569e-15	2.98327e-13	14.1627	12.5253
CONR	CP	ENSMUSG00000003949.16	Hlf	CP	3.06157	7.20814e-15	3.12042e-13	14.1422	12.5058
CONR	CP	ENSMUSG00000026042.16	Col5a2	CP	1.99339	7.32241e-15	3.16272e-13	14.1353	12.4999
CONR	CP	ENSMUSG00000030074.9	Gxylt2	CP	2.38898	7.41398e-15	3.19504e-13	14.1299	12.4955
CONR	CP	ENSMUSG00000032096.16	Arcn1	CP	1.47639	7.93785e-15	3.4131e-13	14.1003	12.4669
CONR	CP	ENSMUSG00000105906.1	Iglc1	CP	3.76585	8.38286e-15	3.59206e-13	14.0766	12.4447
CONR	CP	ENSMUSG00000041313.14	Slc7a1	CP	1.91171	8.3917e-15	3.59206e-13	14.0762	12.4447
CONR	CP	ENSMUSG00000037573.5	Tob1	CP	2.04897	8.91377e-15	3.807e-13	14.0499	12.4194
CONR	CP	ENSMUSG00000015357.10	Clpx	CP	1.56037	1.01278e-14	4.31587e-13	13.9945	12.3649
CONR	CP	ENSMUSG00000030844.11	Rgs10	CP	2.80639	1.02011e-14	4.33741e-13	13.9914	12.3628
CONR	CP	ENSMUSG00000042286.13	Stab1	CP	1.66009	1.0323e-14	4.37948e-13	13.9862	12.3586
CONR	CP	ENSMUSG00000022763.16	Aifm3	CP	1.96852	1.09449e-14	4.63302e-13	13.9608	12.3341
CONR	CP	ENSMUSG00000028132.15	Tmem56	CP	2.30153	1.14326e-14	4.82874e-13	13.9419	12.3162
CONR	CP	ENSMUSG00000079227.10	Ccr5	CP	2.86987	1.16984e-14	4.93011e-13	13.9319	12.3071
CONR	CP	ENSMUSG00000030048.5	Gkn3	CP	5.94676	1.21676e-14	5.11656e-13	13.9148	12.291
CONR	CP	ENSMUSG00000027422.15	Rrbp1	CP	2.07428	1.23172e-14	5.16807e-13	13.9095	12.2867
CONR	CP	ENSMUSG00000029287.14	Tgfbr3	CP	1.62039	1.29175e-14	5.40806e-13	13.8888	12.267
CONR	CP	ENSMUSG00000034652.12	Cd300a	CP	2.5968	1.30493e-14	5.45131e-13	13.8844	12.2635
CONR	CP	ENSMUSG00000027506.15	Tpd52	CP	1.54559	1.4103e-14	5.8786e-13	13.8507	12.2307
CONR	CP	ENSMUSG00000022419.15	Deptor	CP	1.75605	1.44315e-14	6.00243e-13	13.8407	12.2217
CONR	CP	ENSMUSG00000024782.7	Ak3	CP	1.55473	1.44751e-14	6.00747e-13	13.8394	12.2213
CONR	CP	ENSMUSG00000017007.9	Rbpjl	CP	1.98571	1.52322e-14	6.30799e-13	13.8172	12.2001
CONR	CP	ENSMUSG00000030327.8	Necap1	CP	1.69259	1.59979e-14	6.61072e-13	13.7959	12.1798
CONR	CP	ENSMUSG00000030530.15	Furin	CP	1.48873	1.64717e-14	6.7918e-13	13.7833	12.168
CONR	CP	ENSMUSG00000040016.16	Ptger3	CP	2.30125	1.67878e-14	6.90722e-13	13.775	12.1607
CONR	CP	ENSMUSG00000049288.4	Lix1l	CP	1.86764	1.7198e-14	7.05019e-13	13.7645	12.1518
CONR	CP	ENSMUSG00000010095.13	Slc3a2	CP	1.98719	1.72099e-14	7.05019e-13	13.7642	12.1518
CONR	CP	ENSMUSG00000026663.6	Atf6	CP	1.77123	1.7246e-14	7.05019e-13	13.7633	12.1518
CONR	CP	ENSMUSG00000027848.12	Olfml3	CP	2.60508	1.74311e-14	7.11061e-13	13.7587	12.1481
CONR	CP	ENSMUSG00000038156.16	Spon1	CP	2.31256	1.8633e-14	7.58469e-13	13.7297	12.1201
CONR	CP	ENSMUSG00000005873.5	Reep5	CP	1.74183	1.8955e-14	7.69935e-13	13.7223	12.1135
CONR	CP	ENSMUSG00000033530.8	Ttc7b	CP	1.64859	2.01593e-14	8.17113e-13	13.6955	12.0877
CONR	CP	ENSMUSG00000025255.18	Zfhx4	CP	2.47602	2.2293e-14	9.01684e-13	13.6518	12.0449
CONR	CP	ENSMUSG00000041891.15	Lman1	CP	1.8146	2.39404e-14	9.66272e-13	13.6209	12.0149
CONR	CP	ENSMUSG00000030659.14	Nucb2	CP	2.19438	2.43326e-14	9.80028e-13	13.6138	12.0088
CONR	CP	ENSMUSG00000035765.9	Dym	CP	1.39362	2.45732e-14	9.87636e-13	13.6095	12.0054
CONR	CP	ENSMUSG00000019977.16	Hbs1l	CP	1.46637	2.49064e-14	9.98924e-13	13.6037	12.0005
CONR	CP	ENSMUSG00000075232.5	Amd1	CP	1.50546	2.56815e-14	1.02785e-12	13.5904	11.9881
CONR	CP	ENSMUSG00000054263.11	Lifr	CP	1.42909	2.60818e-14	1.04169e-12	13.5837	11.9823
CONR	CP	ENSMUSG00000049103.14	Ccr2	CP	2.80479	2.61902e-14	1.04383e-12	13.5819	11.9814
CONR	CP	ENSMUSG00000035279.8	Ssc5d	CP	2.44955	2.73744e-14	1.08876e-12	13.5627	11.9631
CONR	CP	ENSMUSG00000024300.16	Myo1f	CP	2.31916	2.79984e-14	1.11126e-12	13.5529	11.9542
CONR	CP	ENSMUSG00000026437.11	Cdk18	CP	1.96581	3.34116e-14	1.32336e-12	13.4761	11.8783
CONR	CP	ENSMUSG00000089682.9	Bcl2l2	CP	1.56479	3.65359e-14	1.44411e-12	13.4373	11.8404
CONR	CP	ENSMUSG00000043252.8	Tmem64	CP	1.37389	3.67003e-14	1.44761e-12	13.4353	11.8393
CONR	CP	ENSMUSG00000032374.14	Plod2	CP	3.51948	4.02233e-14	1.5833e-12	13.3955	11.8004
CONR	CP	ENSMUSG00000001829.17	Clpb	CP	1.51861	4.05214e-14	1.59176e-12	13.3923	11.7981
CONR	CP	ENSMUSG00000032265.14	Tent5a	CP	2.06613	4.45313e-14	1.74568e-12	13.3513	11.758
CONR	CP	ENSMUSG00000027249.15	F2	CONR	2.93296	4.53299e-14	1.77335e-12	13.3436	11.7512
CONR	CP	ENSMUSG00000048332.13	Lhfp	CP	1.42991	4.68405e-14	1.8287e-12	13.3294	11.7379
CONR	CP	ENSMUSG00000076937.3	Iglc2	CP	3.30677	5.00454e-14	1.94983e-12	13.3006	11.71
CONR	CP	ENSMUSG00000027074.14	Slc43a3	CP	1.66764	5.16169e-14	2.00696e-12	13.2872	11.6975
CONR	CP	ENSMUSG00000040690.15	Col16a1	CP	1.96603	5.76212e-14	2.23587e-12	13.2394	11.6506
CONR	CP	ENSMUSG00000060572.17	Mfap2	CP	2.90614	5.96998e-14	2.31182e-12	13.224	11.636
CONR	CP	ENSMUSG00000031486.15	Adgra2	CP	1.75959	6.04088e-14	2.33454e-12	13.2189	11.6318
CONR	CP	ENSMUSG00000061013.5	Mkx	CONR	2.41466	6.41888e-14	2.47561e-12	13.1925	11.6063
CONR	CP	ENSMUSG00000090582.1	Gm17024	CONR	3.46951	6.44009e-14	2.47879e-12	13.1911	11.6058
CONR	CP	ENSMUSG00000038880.13	Mrps34	CP	1.42955	6.49415e-14	2.49456e-12	13.1875	11.603
CONR	CP	ENSMUSG00000025888.5	Casp1	CP	3.05893	6.53442e-14	2.50499e-12	13.1848	11.6012
CONR	CP	ENSMUSG00000001131.11	Timp1	CP	3.72948	6.63178e-14	2.53722e-12	13.1784	11.5956
CONR	CP	ENSMUSG00000039137.18	Whrn	CP	1.75032	6.69268e-14	2.5554e-12	13.1744	11.5925
CONR	CP	ENSMUSG00000030359.14	Pzp	CONR	3.21878	6.71666e-14	2.55944e-12	13.1728	11.5919
CONR	CP	ENSMUSG00000001555.10	Fkbp10	CP	2.24648	6.82475e-14	2.59545e-12	13.1659	11.5858
CONR	CP	ENSMUSG00000072115.10	Ang	CP	1.5251	6.91782e-14	2.62561e-12	13.16	11.5808
CONR	CP	ENSMUSG00000095105.2	Edaradd	CP	1.82892	6.96408e-14	2.63792e-12	13.1571	11.5787
CONR	CP	ENSMUSG00000017188.3	Coa3	CP	1.56865	6.99668e-14	2.64361e-12	13.1551	11.5778
CONR	CP	ENSMUSG00000040681.14	Hmgn1	CP	1.29925	7.0068e-14	2.64361e-12	13.1545	11.5778
CONR	CP	ENSMUSG00000024529.13	Lox	CP	2.21752	7.0928e-14	2.6701e-12	13.1492	11.5735
CONR	CP	ENSMUSG00000034088.15	Hdlbp	CP	1.81122	7.10498e-14	2.6701e-12	13.1484	11.5735
CONR	CP	ENSMUSG00000002944.15	Cd36	CP	1.7134	7.17182e-14	2.68992e-12	13.1444	11.5703
CONR	CP	ENSMUSG00000018927.3	Ccl6	CP	2.39815	7.51704e-14	2.81388e-12	13.124	11.5507
CONR	CP	ENSMUSG00000039330.4	Tsga10ip	CP	2.2095	8.02094e-14	2.99663e-12	13.0958	11.5234
CONR	CP	ENSMUSG00000021771.13	Vdac2	CP	1.19231	8.37343e-14	3.12221e-12	13.0771	11.5055
CONR	CP	ENSMUSG00000015290.15	Ubl4a	CP	1.61745	8.48473e-14	3.15754e-12	13.0714	11.5007
CONR	CP	ENSMUSG00000031387.14	Renbp	CP	2.86396	8.75051e-14	3.25011e-12	13.058	11.4881
CONR	CP	ENSMUSG00000001105.15	Ift20	CP	1.5061	8.99436e-14	3.3342e-12	13.046	11.477
CONR	CP	ENSMUSG00000029171.12	Pgm2	CP	1.48267	9.19498e-14	3.40197e-12	13.0364	11.4683
CONR	CP	ENSMUSG00000071230.6	Npw	CONR	3.10396	9.55435e-14	3.52809e-12	13.0198	11.4525
CONR	CP	ENSMUSG00000078520.3	Cela3a	CONR	2.74128	9.91454e-14	3.65403e-12	13.0037	11.4372
CONR	CP	ENSMUSG00000042305.12	Tmem183a	CP	1.4799	1.00074e-13	3.68115e-12	12.9997	11.434
CONR	CP	ENSMUSG00000054716.4	Zfp771	CP	1.79546	1.03062e-13	3.78376e-12	12.9869	11.4221
CONR	CP	ENSMUSG00000028392.15	Bspry	CP	2.24968	1.06893e-13	3.9169e-12	12.971	11.4071
CONR	CP	ENSMUSG00000054277.7	Arfgap3	CP	1.76793	1.07544e-13	3.93319e-12	12.9684	11.4053
CONR	CP	ENSMUSG00000033685.13	Ucp2	CP	1.97878	1.08701e-13	3.96789e-12	12.9638	11.4014
CONR	CP	ENSMUSG00000024063.12	Lbh	CP	1.43918	1.10706e-13	4.03336e-12	12.9558	11.3943
CONR	CP	ENSMUSG00000022216.16	Psme1	CP	1.93737	1.10973e-13	4.03541e-12	12.9548	11.3941
CONR	CP	ENSMUSG00000030835.6	Nomo1	CP	1.86155	1.11661e-13	4.05272e-12	12.9521	11.3923
CONR	CP	ENSMUSG00000084939.2	Gm830	CP	4.5018	1.12272e-13	4.06716e-12	12.9497	11.3907
CONR	CP	ENSMUSG00000037493.6	Cib2	CP	2.10183	1.12584e-13	4.07071e-12	12.9485	11.3903
CONR	CP	ENSMUSG00000060802.8	B2m	CP	2.08882	1.14193e-13	4.12109e-12	12.9424	11.385
CONR	CP	ENSMUSG00000024560.6	Cxxc1	CP	1.31544	1.14422e-13	4.12156e-12	12.9415	11.3849
CONR	CP	ENSMUSG00000024516.12	Sec11c	CP	1.6062	1.16976e-13	4.20565e-12	12.9319	11.3762
CONR	CP	ENSMUSG00000030800.10	Prss8	CP	2.00992	1.19007e-13	4.27059e-12	12.9244	11.3695
CONR	CP	ENSMUSG00000010755.17	Cars	CP	1.62945	1.21345e-13	4.34635e-12	12.916	11.3619
CONR	CP	ENSMUSG00000062488.9	Ifit3b	CP	3.03399	1.27361e-13	4.55329e-12	12.895	11.3417
CONR	CP	ENSMUSG00000018196.18	Glrx2	CP	1.30901	1.30595e-13	4.66015e-12	12.8841	11.3316
CONR	CP	ENSMUSG00000037278.9	Tmem97	CP	1.86129	1.32387e-13	4.71532e-12	12.8782	11.3265
CONR	CP	ENSMUSG00000057789.13	Bak1	CP	2.33569	1.39386e-13	4.95533e-12	12.8558	11.3049
CONR	CP	ENSMUSG00000021728.7	Emb	CP	2.04116	1.40512e-13	4.98607e-12	12.8523	11.3022
CONR	CP	ENSMUSG00000029772.17	Ahcyl2	CP	1.20044	1.53721e-13	5.4447e-12	12.8133	11.264
CONR	CP	ENSMUSG00000022629.16	Kif21a	CONR	2.37798	1.57354e-13	5.56305e-12	12.8031	11.2547
CONR	CP	ENSMUSG00000034435.6	Tmem30b	CP	2.30849	1.58817e-13	5.60437e-12	12.7991	11.2515
CONR	CP	ENSMUSG00000054404.13	Slfn5	CP	1.58386	1.62833e-13	5.7355e-12	12.7883	11.2414
CONR	CP	ENSMUSG00000026090.16	2010300C02Rik	CP	2.05845	1.65417e-13	5.81579e-12	12.7814	11.2354
CONR	CP	ENSMUSG00000033287.15	Kctd17	CP	1.60643	1.68355e-13	5.9082e-12	12.7738	11.2285
CONR	CP	ENSMUSG00000022241.5	Tars	CP	1.22209	1.73289e-13	6.07019e-12	12.7612	11.2168
CONR	CP	ENSMUSG00000029189.10	Sel1l3	CP	2.30129	1.7998e-13	6.29303e-12	12.7448	11.2011
CONR	CP	ENSMUSG00000025140.15	Pycr1	CP	2.24279	1.80754e-13	6.30854e-12	12.7429	11.2001
CONR	CP	ENSMUSG00000034353.14	Ramp1	CP	1.32204	1.84195e-13	6.41692e-12	12.7347	11.1927
CONR	CP	ENSMUSG00000023987.14	Pgc	CP	5.78602	1.87359e-13	6.51526e-12	12.7273	11.1861
CONR	CP	ENSMUSG00000040562.12	Gstm2	CP	1.80865	1.94857e-13	6.76366e-12	12.7103	11.1698
CONR	CP	ENSMUSG00000024503.2	Spink1	CP	1.68139	2.03548e-13	7.05253e-12	12.6913	11.1517
CONR	CP	ENSMUSG00000050335.16	Lgals3	CP	2.26665	2.14029e-13	7.40223e-12	12.6695	11.1306
CONR	CP	ENSMUSG00000019872.13	Smpdl3a	CP	1.66768	2.2423e-13	7.741e-12	12.6493	11.1112
CONR	CP	ENSMUSG00000005681.12	Apoa2	CONR	2.57881	2.25539e-13	7.77215e-12	12.6468	11.1095
CONR	CP	ENSMUSG00000035521.13	Gnptg	CP	1.41172	2.28959e-13	7.87579e-12	12.6402	11.1037
CONR	CP	ENSMUSG00000014599.10	Csf1	CP	1.81027	2.29406e-13	7.87697e-12	12.6394	11.1036
CONR	CP	ENSMUSG00000004730.14	Adgre1	CP	2.05698	2.3781e-13	8.15087e-12	12.6238	11.0888
CONR	CP	ENSMUSG00000032479.15	Map4	CP	1.28304	2.70942e-13	9.2698e-12	12.5671	11.0329
CONR	CP	ENSMUSG00000022090.10	Pdlim2	CP	2.27677	2.80612e-13	9.58347e-12	12.5519	11.0185
CONR	CP	ENSMUSG00000038650.15	Rnh1	CP	1.52407	2.85298e-13	9.72613e-12	12.5447	11.0121
CONR	CP	ENSMUSG00000056035.8	Cyp3a11	CONR	3.24893	2.9121e-13	9.90997e-12	12.5358	11.0039
CONR	CP	ENSMUSG00000007872.3	Id3	CP	1.89379	2.93843e-13	9.98178e-12	12.5319	11.0008
CONR	CP	ENSMUSG00000009614.16	Sardh	CP	2.1586	3.2058e-13	1.08536e-11	12.4941	10.9644
CONR	CP	ENSMUSG00000041426.12	Hibch	CP	1.41944	3.20644e-13	1.08536e-11	12.494	10.9644
CONR	CP	ENSMUSG00000028456.18	Unc13b	CP	1.84633	3.23403e-13	1.09276e-11	12.4903	10.9615
CONR	CP	ENSMUSG00000071176.10	Arhgef10	CP	1.66422	3.33499e-13	1.12488e-11	12.4769	10.9489
CONR	CP	ENSMUSG00000079547.3	H2-DMb1	CP	2.36779	3.37569e-13	1.1366e-11	12.4716	10.9444
CONR	CP	ENSMUSG00000022032.14	Scara5	CP	1.63676	3.50005e-13	1.17558e-11	12.4559	10.9297
CONR	CP	ENSMUSG00000032263.14	Bckdhb	CP	1.55843	3.50376e-13	1.17558e-11	12.4555	10.9297
CONR	CP	ENSMUSG00000018677.9	Slc25a39	CP	1.81331	3.73142e-13	1.24977e-11	12.4281	10.9032
CONR	CP	ENSMUSG00000053334.6	Ficd	CP	1.49158	3.92581e-13	1.31257e-11	12.4061	10.8819
CONR	CP	ENSMUSG00000037851.13	Iars	CP	1.49741	3.94409e-13	1.31638e-11	12.4041	10.8806
CONR	CP	ENSMUSG00000017929.13	B4galt5	CP	1.89677	3.96879e-13	1.32231e-11	12.4013	10.8787
CONR	CP	ENSMUSG00000056515.8	Rab31	CP	1.61608	4.00935e-13	1.33349e-11	12.3969	10.875
CONR	CP	ENSMUSG00000026816.14	Gtf3c5	CP	1.43296	4.02437e-13	1.33616e-11	12.3953	10.8741
CONR	CP	ENSMUSG00000060376.7	Bckdha	CP	1.69243	4.11347e-13	1.36337e-11	12.3858	10.8654
CONR	CP	ENSMUSG00000097908.7	4933404O12Rik	CP	1.73641	4.25995e-13	1.40947e-11	12.3706	10.8509
CONR	CP	ENSMUSG00000063903.5	Klk1	CONR	2.57285	4.43261e-13	1.46407e-11	12.3533	10.8344
CONR	CP	ENSMUSG00000020307.15	Cdc34	CP	1.57806	4.45056e-13	1.46746e-11	12.3516	10.8334
CONR	CP	ENSMUSG00000030772.6	Dkk3	CP	1.99579	4.57838e-13	1.507e-11	12.3393	10.8219
CONR	CP	ENSMUSG00000059327.9	Eda	CP	2.03188	4.65001e-13	1.52794e-11	12.3325	10.8159
CONR	CP	ENSMUSG00000036545.8	Adamts2	CP	2.20638	4.71329e-13	1.54607e-11	12.3267	10.8108
CONR	CP	ENSMUSG00000020044.13	Timp3	CP	1.24541	4.87779e-13	1.59729e-11	12.3118	10.7966
CONR	CP	ENSMUSG00000002393.14	Nr2f6	CP	1.31441	5.0579e-13	1.65343e-11	12.296	10.7816
CONR	CP	ENSMUSG00000068758.7	Il3ra	CP	1.99221	5.13479e-13	1.6757e-11	12.2895	10.7758
CONR	CP	ENSMUSG00000020477.10	Mrps24	CP	1.31745	5.18199e-13	1.68821e-11	12.2855	10.7726
CONR	CP	ENSMUSG00000040466.16	Blvrb	CP	1.7884	5.23369e-13	1.70159e-11	12.2812	10.7691
CONR	CP	ENSMUSG00000024769.7	Cdc42bpg	CP	1.69923	5.24087e-13	1.70159e-11	12.2806	10.7691
CONR	CP	ENSMUSG00000025154.14	Arhgap19	CP	2.47332	5.26917e-13	1.70787e-11	12.2783	10.7675
CONR	CP	ENSMUSG00000045679.14	Pqlc3	CP	2.28368	5.36224e-13	1.73509e-11	12.2707	10.7607
CONR	CP	ENSMUSG00000042616.8	Oscp1	CP	1.8412	5.43477e-13	1.75559e-11	12.2648	10.7556
CONR	CP	ENSMUSG00000048546.7	Tob2	CP	1.46285	5.65178e-13	1.8226e-11	12.2478	10.7393
CONR	CP	ENSMUSG00000034994.10	Eef2	CP	1.65512	5.80267e-13	1.86811e-11	12.2364	10.7286
CONR	CP	ENSMUSG00000036452.17	Arhgap26	CP	1.32831	5.83175e-13	1.87431e-11	12.2342	10.7272
CONR	CP	ENSMUSG00000023885.8	Thbs2	CP	2.14927	5.90358e-13	1.89421e-11	12.2289	10.7226
CONR	CP	ENSMUSG00000026536.9	Ifi211	CP	2.90892	6.02926e-13	1.93129e-11	12.2197	10.7142
CONR	CP	ENSMUSG00000021557.14	Agtpbp1	CP	1.68803	6.10844e-13	1.95337e-11	12.2141	10.7092
CONR	CP	ENSMUSG00000034112.9	Atp2c2	CP	2.25925	6.18046e-13	1.9731e-11	12.209	10.7049
CONR	CP	ENSMUSG00000001627.12	Ifrd1	CP	1.71576	6.44257e-13	2.05334e-11	12.1909	10.6875
CONR	CP	ENSMUSG00000071521.4	Try10	CP	2.06432	6.46121e-13	2.05585e-11	12.1897	10.687
CONR	CP	ENSMUSG00000044894.14	Uqcrq	CP	1.63829	6.71106e-13	2.13179e-11	12.1732	10.6713
CONR	CP	ENSMUSG00000004460.16	Dnajb11	CP	1.48273	6.77712e-13	2.1492e-11	12.169	10.6677
CONR	CP	ENSMUSG00000057969.15	Sema3b	CP	1.84515	6.90772e-13	2.18699e-11	12.1607	10.6602
CONR	CP	ENSMUSG00000049775.16	Tmsb4x	CP	2.21421	7.28001e-13	2.30104e-11	12.1379	10.6381
CONR	CP	ENSMUSG00000031608.13	Galnt7	CP	1.47212	7.30009e-13	2.30357e-11	12.1367	10.6376
CONR	CP	ENSMUSG00000039976.4	Tbc1d16	CP	1.45126	7.3498e-13	2.31543e-11	12.1337	10.6354
CONR	CP	ENSMUSG00000031782.15	Coq9	CP	1.38047	7.38475e-13	2.32261e-11	12.1317	10.634
CONR	CP	ENSMUSG00000041650.15	Pcca	CP	1.45116	8.35465e-13	2.62333e-11	12.0781	10.5811
CONR	CP	ENSMUSG00000084319.3	Tpt1-ps3	CP	1.49694	8.47845e-13	2.65784e-11	12.0717	10.5755
CONR	CP	ENSMUSG00000025743.14	Sdc3	CP	1.87487	8.65322e-13	2.70817e-11	12.0628	10.5673
CONR	CP	ENSMUSG00000079037.9	Prnp	CP	1.51491	8.71971e-13	2.72452e-11	12.0595	10.5647
CONR	CP	ENSMUSG00000028618.11	Tmem59	CP	1.52786	8.74123e-13	2.72678e-11	12.0584	10.5644
CONR	CP	ENSMUSG00000019368.13	Sec14l4	CP	2.16943	8.82448e-13	2.74826e-11	12.0543	10.5609
CONR	CP	ENSMUSG00000028001.16	Fga	CONR	3.24806	9.18128e-13	2.85472e-11	12.0371	10.5444
CONR	CP	ENSMUSG00000020263.14	Appl2	CP	1.77544	9.37955e-13	2.91163e-11	12.0278	10.5359
CONR	CP	ENSMUSG00000032399.8	Rpl4	CP	1.24525	9.7194e-13	3.01223e-11	12.0124	10.5211
CONR	CP	ENSMUSG00000006362.16	Cbfa2t3	CP	1.54643	9.94369e-13	3.07674e-11	12.0025	10.5119
CONR	CP	ENSMUSG00000024810.16	Il33	CP	2.80705	1.00225e-12	3.09612e-11	11.999	10.5092
CONR	CP	ENSMUSG00000035828.10	Pim3	CP	1.78771	1.04675e-12	3.22835e-11	11.9802	10.491
CONR	CP	ENSMUSG00000017119.19	Nbr1	CP	1.53603	1.05302e-12	3.24246e-11	11.9776	10.4891
CONR	CP	ENSMUSG00000047446.18	Arl4a	CP	1.15011	1.12044e-12	3.44449e-11	11.9506	10.4629
CONR	CP	ENSMUSG00000090523.2	Gypc	CP	2.54904	1.15273e-12	3.53566e-11	11.9383	10.4515
CONR	CP	ENSMUSG00000027834.15	Serpini1	CP	1.93196	1.1538e-12	3.53566e-11	11.9379	10.4515
CONR	CP	ENSMUSG00000031202.5	Rab39b	CONR	2.8415	1.16931e-12	3.57745e-11	11.9321	10.4464
CONR	CP	ENSMUSG00000031232.16	Magt1	CP	1.63379	1.17838e-12	3.59943e-11	11.9287	10.4438
CONR	CP	ENSMUSG00000040339.10	Fam102b	CP	1.66417	1.19608e-12	3.64765e-11	11.9222	10.438
CONR	CP	ENSMUSG00000017466.9	Timp2	CP	1.69514	1.2242e-12	3.72748e-11	11.9121	10.4286
CONR	CP	ENSMUSG00000057400.14	Ces1c	CONR	3.21077	1.25579e-12	3.81507e-11	11.9011	10.4185
CONR	CP	ENSMUSG00000033998.9	Kcnk1	CP	2.20365	1.25761e-12	3.81507e-11	11.9005	10.4185
CONR	CP	ENSMUSG00000006204.6	5430419D17Rik	CONR	3.36927	1.25897e-12	3.81507e-11	11.9	10.4185
CONR	CP	ENSMUSG00000030881.15	Arfip2	CP	1.64062	1.26758e-12	3.83508e-11	11.897	10.4162
CONR	CP	ENSMUSG00000049091.6	Sephs2	CP	1.58751	1.29207e-12	3.903e-11	11.8887	10.4086
CONR	CP	ENSMUSG00000008461.6	Fut1	CP	2.2942	1.30921e-12	3.94852e-11	11.883	10.4036
CONR	CP	ENSMUSG00000031903.7	Pla2g15	CP	1.41034	1.33983e-12	4.0345e-11	11.873	10.3942
CONR	CP	ENSMUSG00000028797.20	Tmem234	CP	1.1772	1.41772e-12	4.2623e-11	11.8484	10.3704
CONR	CP	ENSMUSG00000024480.7	Ap3s1	CP	1.5944	1.45622e-12	4.37118e-11	11.8368	10.3594
CONR	CP	ENSMUSG00000045790.10	Ccdc149	CP	1.83304	1.48233e-12	4.44256e-11	11.8291	10.3524
CONR	CP	ENSMUSG00000021779.16	Thrb	CP	1.88194	1.49751e-12	4.48103e-11	11.8246	10.3486
CONR	CP	ENSMUSG00000006611.14	Hfe	CP	1.65539	1.55498e-12	4.6457e-11	11.8083	10.3329
CONR	CP	ENSMUSG00000003380.11	Rabac1	CP	1.65585	1.58781e-12	4.73639e-11	11.7992	10.3246
CONR	CP	ENSMUSG00000000340.10	Dbt	CP	1.75487	1.59208e-12	4.74172e-11	11.798	10.3241
CONR	CP	ENSMUSG00000002602.16	Axl	CP	1.48157	1.6605e-12	4.93778e-11	11.7798	10.3065
CONR	CP	ENSMUSG00000039252.11	Lgi2	CP	2.0496	1.67491e-12	4.97288e-11	11.776	10.3034
CONR	CP	ENSMUSG00000018189.12	Uchl5	CP	1.47801	1.70373e-12	5.05061e-11	11.7686	10.2967
CONR	CP	ENSMUSG00000019894.14	Slc6a15	CONR	3.40444	1.7189e-12	5.08768e-11	11.7647	10.2935
CONR	CP	ENSMUSG00000062073.6	Gm10109	CP	2.24086	1.72858e-12	5.1084e-11	11.7623	10.2917
CONR	CP	ENSMUSG00000000296.8	Tpd52l1	CP	2.23352	1.81186e-12	5.34626e-11	11.7419	10.2719
CONR	CP	ENSMUSG00000052776.10	Oas1a	CP	2.9487	1.906e-12	5.61534e-11	11.7199	10.2506
CONR	CP	ENSMUSG00000000739.14	Sult5a1	CP	2.85547	1.95597e-12	5.7537e-11	11.7086	10.2401
CONR	CP	ENSMUSG00000041559.7	Fmod	CP	2.02502	1.96106e-12	5.75979e-11	11.7075	10.2396
CONR	CP	ENSMUSG00000056737.14	Capg	CP	1.90984	2.01289e-12	5.90292e-11	11.6962	10.2289
CONR	CP	ENSMUSG00000029705.17	Cux1	CP	1.39128	2.02638e-12	5.93338e-11	11.6933	10.2267
CONR	CP	ENSMUSG00000038400.15	Pmepa1	CP	1.69002	2.0711e-12	6.05503e-11	11.6838	10.2179
CONR	CP	ENSMUSG00000048578.11	Mlec	CP	1.50359	2.09594e-12	6.11829e-11	11.6786	10.2134
CONR	CP	ENSMUSG00000022440.8	C1qtnf6	CP	2.06763	2.10376e-12	6.13175e-11	11.677	10.2124
CONR	CP	ENSMUSG00000051403.9	Ppp1r37	CP	1.2507	2.14028e-12	6.22867e-11	11.6695	10.2056
CONR	CP	ENSMUSG00000034981.9	Parm1	CP	1.19634	2.2845e-12	6.63828e-11	11.6412	10.1779
CONR	CP	ENSMUSG00000040640.10	Erc2	CONR	2.74366	2.31571e-12	6.71874e-11	11.6353	10.1727
CONR	CP	ENSMUSG00000030732.13	Chrdl2	CONR	4.16767	2.32025e-12	6.72169e-11	11.6345	10.1725
CONR	CP	ENSMUSG00000013698.12	Pea15a	CP	1.37975	2.37723e-12	6.87632e-11	11.6239	10.1626
CONR	CP	ENSMUSG00000006205.13	Htra1	CP	1.54838	2.3955e-12	6.91867e-11	11.6206	10.16
CONR	CP	ENSMUSG00000030654.9	Arl6ip1	CP	1.53912	2.45393e-12	7.07673e-11	11.6101	10.1502
CONR	CP	ENSMUSG00000087014.1	Gm16364	CP	2.0498	2.45763e-12	7.07673e-11	11.6095	10.1502
CONR	CP	ENSMUSG00000028910.12	Mecr	CP	1.70482	2.48488e-12	7.14442e-11	11.6047	10.146
CONR	CP	ENSMUSG00000006494.11	Pdk1	CP	1.26056	2.55821e-12	7.34417e-11	11.5921	10.1341
CONR	CP	ENSMUSG00000048234.13	Rnf149	CP	1.43514	2.60337e-12	7.46261e-11	11.5845	10.1271
CONR	CP	ENSMUSG00000026482.13	Rgl1	CP	1.57229	2.66634e-12	7.63165e-11	11.5741	10.1174
CONR	CP	ENSMUSG00000037902.18	Sirpa	CP	1.78303	2.70084e-12	7.71882e-11	11.5685	10.1124
CONR	CP	ENSMUSG00000069917.7	Hba-a2	CP	2.97581	2.74759e-12	7.8407e-11	11.561	10.1056
CONR	CP	ENSMUSG00000041959.14	S100a10	CP	1.81608	2.7666e-12	7.88315e-11	11.5581	10.1033
CONR	CP	ENSMUSG00000028277.13	Ube2j1	CP	1.16833	2.88245e-12	8.20102e-11	11.5402	10.0861
CONR	CP	ENSMUSG00000033880.11	Lgals3bp	CP	1.46721	2.89395e-12	8.22149e-11	11.5385	10.085
CONR	CP	ENSMUSG00000035863.14	Palm	CP	1.61971	2.91752e-12	8.27612e-11	11.535	10.0822
CONR	CP	ENSMUSG00000029642.11	Polr1d	CP	1.07314	2.93201e-12	8.3049e-11	11.5328	10.0807
CONR	CP	ENSMUSG00000043631.8	Ecm2	CP	1.8341	2.96324e-12	8.38093e-11	11.5282	10.0767
CONR	CP	ENSMUSG00000036596.6	Cpz	CP	2.89906	2.98868e-12	8.44038e-11	11.5245	10.0736
CONR	CP	ENSMUSG00000031953.2	Tmem170	CP	1.79251	3.0905e-12	8.71502e-11	11.51	10.0597
CONR	CP	ENSMUSG00000038642.10	Ctss	CP	2.39636	3.13586e-12	8.82991e-11	11.5036	10.054
CONR	CP	ENSMUSG00000021339.3	Mrs2	CP	1.47415	3.18594e-12	8.9577e-11	11.4968	10.0478
CONR	CP	ENSMUSG00000028622.11	Mrpl37	CP	1.18306	3.25405e-12	9.13576e-11	11.4876	10.0393
CONR	CP	ENSMUSG00000035203.16	Epn1	CP	1.47605	3.29229e-12	9.22954e-11	11.4825	10.0348
CONR	CP	ENSMUSG00000047904.6	Sstr2	CP	2.19909	3.34621e-12	9.36694e-11	11.4754	10.0284
CONR	CP	ENSMUSG00000025369.15	Smarcc2	CP	1.02713	3.75569e-12	1.04978e-10	11.4253	9.9789
CONR	CP	ENSMUSG00000026715.12	Serpinc1	CONR	2.66504	4.25881e-12	1.18867e-10	11.3707	9.92494
CONR	CP	ENSMUSG00000044468.14	Tent5c	CP	2.01429	4.38242e-12	1.22138e-10	11.3583	9.91315
CONR	CP	ENSMUSG00000084883.2	Ccdc85c	CP	1.98103	4.41848e-12	1.22964e-10	11.3547	9.91022
CONR	CP	ENSMUSG00000072941.5	Sod3	CP	1.7764	4.50937e-12	1.25311e-10	11.3459	9.90201
CONR	CP	ENSMUSG00000029512.11	Ulk1	CP	1.19254	4.56028e-12	1.26541e-10	11.341	9.89777
CONR	CP	ENSMUSG00000039050.8	Osbpl2	CP	1.43407	4.62199e-12	1.28067e-10	11.3352	9.89256
CONR	CP	ENSMUSG00000022558.15	Mroh1	CP	1.25956	4.70606e-12	1.30208e-10	11.3273	9.88536
CONR	CP	ENSMUSG00000034118.15	Tpst1	CP	1.70348	4.72932e-12	1.30662e-10	11.3252	9.88385
CONR	CP	ENSMUSG00000091705.8	H2-Q2	CP	2.23696	4.93017e-12	1.36014e-10	11.3071	9.86642
CONR	CP	ENSMUSG00000022993.6	4930415O20Rik	CP	1.66192	5.16662e-12	1.42332e-10	11.2868	9.8467
CONR	CP	ENSMUSG00000056749.7	Nfil3	CONR	2.4336	5.22002e-12	1.43596e-10	11.2823	9.84286
CONR	CP	ENSMUSG00000029771.12	Irf5	CP	2.53483	5.26606e-12	1.44654e-10	11.2785	9.83967
CONR	CP	ENSMUSG00000031633.4	Slc25a4	CP	1.40464	5.28224e-12	1.4489e-10	11.2772	9.83896
CONR	CP	ENSMUSG00000023460.12	Rab12	CP	1.51343	5.29239e-12	1.4496e-10	11.2763	9.83875
CONR	CP	ENSMUSG00000033416.15	Gucd1	CP	1.42504	5.51115e-12	1.50735e-10	11.2588	9.82178
CONR	CP	ENSMUSG00000078853.8	Igtp	CP	2.01931	5.58216e-12	1.52459e-10	11.2532	9.81685
CONR	CP	ENSMUSG00000008540.11	Mgst1	CP	1.7701	5.59067e-12	1.52473e-10	11.2525	9.81681
CONR	CP	ENSMUSG00000076594.2	Igkv6-13	CP	5.47017	5.65705e-12	1.54064e-10	11.2474	9.8123
CONR	CP	ENSMUSG00000020101.14	Vsir	CP	2.11516	5.74127e-12	1.56135e-10	11.241	9.8065
CONR	CP	ENSMUSG00000068452.7	Duox2	CP	2.29258	5.76596e-12	1.56583e-10	11.2391	9.80526
CONR	CP	ENSMUSG00000037012.18	Hk1	CP	1.50861	5.82964e-12	1.57938e-10	11.2344	9.80151
CONR	CP	ENSMUSG00000037737.6	Actrt3	CONR	2.78388	5.83241e-12	1.57938e-10	11.2342	9.80151
CONR	CP	ENSMUSG00000028532.14	Cachd1	CP	1.76046	5.86873e-12	1.58697e-10	11.2315	9.79943
CONR	CP	ENSMUSG00000028268.14	Gbp3	CP	1.85185	5.98186e-12	1.61527e-10	11.2232	9.79175
CONR	CP	ENSMUSG00000089745.1	1810008B01Rik	CONR	3.26861	6.0224e-12	1.62392e-10	11.2202	9.78943
CONR	CP	ENSMUSG00000011958.17	Bnip2	CP	1.33899	6.14183e-12	1.65379e-10	11.2117	9.78152
CONR	CP	ENSMUSG00000026116.11	Tmem131	CP	1.20798	6.36092e-12	1.71037e-10	11.1965	9.76691
CONR	CP	ENSMUSG00000027332.11	Ivd	CP	1.42661	6.42939e-12	1.72635e-10	11.1918	9.76287
CONR	CP	ENSMUSG00000032411.15	Tfdp2	CP	1.88863	6.58346e-12	1.76524e-10	11.1815	9.7532
CONR	CP	ENSMUSG00000017446.14	C1qtnf1	CP	1.43506	6.77484e-12	1.814e-10	11.1691	9.74136
CONR	CP	ENSMUSG00000006342.15	Susd2	CP	2.08684	6.84959e-12	1.83145e-10	11.1643	9.73721
CONR	CP	ENSMUSG00000028811.11	Yars	CP	1.49087	7.15584e-12	1.91066e-10	11.1453	9.71882
CONR	CP	ENSMUSG00000020541.12	Tom1l1	CP	1.79874	7.38161e-12	1.96819e-10	11.1318	9.70593
CONR	CP	ENSMUSG00000020448.16	Rnf185	CP	1.18158	7.49568e-12	1.99582e-10	11.1252	9.69988
CONR	CP	ENSMUSG00000026674.9	Ddr2	CP	1.60586	7.69717e-12	2.04661e-10	11.1137	9.68896
CONR	CP	ENSMUSG00000027230.9	Creb3l1	CP	1.89601	7.86138e-12	2.08736e-10	11.1045	9.6804
CONR	CP	ENSMUSG00000036594.14	H2-Aa	CP	2.70469	7.93408e-12	2.10374e-10	11.1005	9.67701
CONR	CP	ENSMUSG00000027907.4	S100a11	CP	1.79742	7.94611e-12	2.10401e-10	11.0998	9.67695
CONR	CP	ENSMUSG00000070044.15	Fam149a	CP	1.77239	8.00828e-12	2.11754e-10	11.0965	9.67417
CONR	CP	ENSMUSG00000024360.7	Etf1	CP	1.12127	8.0268e-12	2.1195e-10	11.0955	9.67377
CONR	CP	ENSMUSG00000046718.8	Bst2	CP	1.5016	8.47595e-12	2.235e-10	11.0718	9.65072
CONR	CP	ENSMUSG00000025175.12	Fn3k	CP	2.20611	8.643e-12	2.27591e-10	11.0633	9.64284
CONR	CP	ENSMUSG00000073490.11	Ifi207	CP	2.18664	8.94612e-12	2.35248e-10	11.0484	9.62847
CONR	CP	ENSMUSG00000079419.4	Ms4a6c	CP	2.30253	9.2078e-12	2.41797e-10	11.0358	9.61655
CONR	CP	ENSMUSG00000054717.7	Hmgb2	CP	2.34278	9.32898e-12	2.44642e-10	11.0302	9.61147
CONR	CP	ENSMUSG00000029452.18	Tmem116	CONR	2.46471	9.47249e-12	2.48065e-10	11.0235	9.60543
CONR	CP	ENSMUSG00000060126.14	Tpt1	CP	1.47177	9.58098e-12	2.50562e-10	11.0186	9.60108
CONR	CP	ENSMUSG00000033487.14	Fndc3a	CP	1.48597	9.62752e-12	2.51435e-10	11.0165	9.59957
CONR	CP	ENSMUSG00000020869.8	Lrrc59	CP	1.6311	9.65045e-12	2.5169e-10	11.0155	9.59913
CONR	CP	ENSMUSG00000027996.13	Sfrp2	CP	3.18331	9.7633e-12	2.54285e-10	11.0104	9.59468
CONR	CP	ENSMUSG00000039197.9	Adk	CP	1.79362	9.78188e-12	2.54422e-10	11.0096	9.59445
CONR	CP	ENSMUSG00000040618.6	Pck2	CP	1.94288	1.01104e-11	2.62609e-10	10.9952	9.58069
CONR	CP	ENSMUSG00000029238.11	Clock	CP	1.51547	1.03772e-11	2.69173e-10	10.9839	9.56997
CONR	CP	ENSMUSG00000004788.11	Eif2b2	CP	1.18767	1.04953e-11	2.7162e-10	10.979	9.56604
CONR	CP	ENSMUSG00000015806.12	Qdpr	CP	1.4161	1.05e-11	2.7162e-10	10.9788	9.56604
CONR	CP	ENSMUSG00000025130.11	P4hb	CP	1.83632	1.09234e-11	2.8219e-10	10.9616	9.54946
CONR	CP	ENSMUSG00000039242.10	B3galnt2	CP	1.24126	1.09661e-11	2.82911e-10	10.9599	9.54835
CONR	CP	ENSMUSG00000041025.15	Iffo2	CP	1.41129	1.16008e-11	2.9888e-10	10.9355	9.5245
CONR	CP	ENSMUSG00000024781.15	Lipa	CP	1.94572	1.1794e-11	3.03449e-10	10.9283	9.51791
CONR	CP	ENSMUSG00000022102.13	Dok2	CP	2.03691	1.21102e-11	3.11105e-10	10.9168	9.50709
CONR	CP	ENSMUSG00000032060.10	Cryab	CP	2.02774	1.21242e-11	3.11105e-10	10.9163	9.50709
CONR	CP	ENSMUSG00000035493.9	Tgfbi	CP	2.07978	1.23512e-11	3.16506e-10	10.9083	9.49962
CONR	CP	ENSMUSG00000030431.8	Tmem238	CP	1.68454	1.26158e-11	3.22606e-10	10.8991	9.49133
CONR	CP	ENSMUSG00000047330.8	Kcne4	CP	2.41844	1.2623e-11	3.22606e-10	10.8988	9.49133
CONR	CP	ENSMUSG00000030017.2	Reg3g	CP	2.6263	1.26629e-11	3.23192e-10	10.8975	9.49054
CONR	CP	ENSMUSG00000022754.5	Tmem45a	CP	3.31596	1.2742e-11	3.24776e-10	10.8948	9.48842
CONR	CP	ENSMUSG00000006019.15	Dhx34	CP	1.6558	1.28278e-11	3.26527e-10	10.8918	9.48608
CONR	CP	ENSMUSG00000037820.15	Tgm2	CP	1.08646	1.28954e-11	3.27811e-10	10.8896	9.48438
CONR	CP	ENSMUSG00000079105.3	C7	CP	2.46987	1.30038e-11	3.30128e-10	10.8859	9.48132
CONR	CP	ENSMUSG00000035268.14	Pkig	CP	1.67662	1.30989e-11	3.321e-10	10.8828	9.47873
CONR	CP	ENSMUSG00000024621.15	Csf1r	CP	1.76054	1.31229e-11	3.32266e-10	10.882	9.47851
CONR	CP	ENSMUSG00000024158.17	Hagh	CP	1.34955	1.32321e-11	3.34587e-10	10.8784	9.47549
CONR	CP	ENSMUSG00000022790.14	Igsf11	CP	1.67894	1.3266e-11	3.35002e-10	10.8773	9.47495
CONR	CP	ENSMUSG00000021187.14	Tc2n	CONR	2.31902	1.33957e-11	3.37829e-10	10.873	9.4713
CONR	CP	ENSMUSG00000060586.10	H2-Eb1	CP	2.53502	1.4037e-11	3.53536e-10	10.8527	9.45157
CONR	CP	ENSMUSG00000038375.15	Trp53inp2	CP	1.28483	1.41403e-11	3.55668e-10	10.8495	9.44895
CONR	CP	ENSMUSG00000096188.1	Cmtm4	CP	1.91669	1.42631e-11	3.58284e-10	10.8458	9.44577
CONR	CP	ENSMUSG00000036908.16	Unc93b1	CP	1.94699	1.45945e-11	3.66129e-10	10.8358	9.43637
CONR	CP	ENSMUSG00000000278.10	Scpep1	CP	1.33139	1.48323e-11	3.71605e-10	10.8288	9.42992
CONR	CP	ENSMUSG00000070407.5	Hs3st3b1	CP	1.98621	1.5091e-11	3.77226e-10	10.8213	9.4234
CONR	CP	ENSMUSG00000073411.11	H2-D1	CP	1.57867	1.50961e-11	3.77226e-10	10.8211	9.4234
CONR	CP	ENSMUSG00000027288.16	Zfp106	CP	1.02133	1.53369e-11	3.82742e-10	10.8143	9.41709
CONR	CP	ENSMUSG00000033960.5	Jcad	CP	1.27215	1.55278e-11	3.86999e-10	10.8089	9.41229
CONR	CP	ENSMUSG00000040434.16	Large2	CP	2.05967	1.56425e-11	3.8935e-10	10.8057	9.40966
CONR	CP	ENSMUSG00000016128.14	Stard13	CP	1.36706	1.62268e-11	4.03367e-10	10.7898	9.3943
CONR	CP	ENSMUSG00000018008.7	Cyth4	CP	2.36226	1.65443e-11	4.10725e-10	10.7814	9.38645
CONR	CP	ENSMUSG00000008734.9	Gprc5b	CP	1.53137	1.71411e-11	4.24989e-10	10.766	9.37162
CONR	CP	ENSMUSG00000038209.12	Itln1	CP	5.32558	1.77045e-11	4.38387e-10	10.7519	9.35814
CONR	CP	ENSMUSG00000003809.14	Gcdh	CP	1.49632	1.78596e-11	4.41655e-10	10.7481	9.35492
CONR	CP	ENSMUSG00000024640.9	Psat1	CP	2.00218	1.78964e-11	4.41993e-10	10.7472	9.35458
CONR	CP	ENSMUSG00000016918.15	Sulf1	CP	1.61969	1.8047e-11	4.45137e-10	10.7436	9.35151
CONR	CP	ENSMUSG00000025804.5	Ccr1	CP	3.08883	1.81777e-11	4.47602e-10	10.7405	9.34911
CONR	CP	ENSMUSG00000073489.6	Ifi204	CP	2.53013	1.81939e-11	4.47602e-10	10.7401	9.34911
CONR	CP	ENSMUSG00000004207.14	Psap	CP	1.69131	1.85214e-11	4.55073e-10	10.7323	9.34192
CONR	CP	ENSMUSG00000064036.15	Mro	CONR	2.69122	1.85941e-11	4.56273e-10	10.7306	9.34078
CONR	CP	ENSMUSG00000066800.11	Rnasel	CP	2.35314	1.8921e-11	4.63699e-10	10.7231	9.33376
CONR	CP	ENSMUSG00000030304.11	Ergic2	CP	1.37202	1.93612e-11	4.73878e-10	10.7131	9.32433
CONR	CP	ENSMUSG00000050520.4	Cldn8	CONR	2.38734	1.95703e-11	4.78381e-10	10.7084	9.32023
CONR	CP	ENSMUSG00000022272.17	Myo10	CP	1.26695	2.00692e-11	4.89951e-10	10.6975	9.30985
CONR	CP	ENSMUSG00000006360.11	Crip1	CP	2.13499	2.01166e-11	4.9048e-10	10.6964	9.30938
CONR	CP	ENSMUSG00000031570.17	Plpp5	CP	1.50546	2.01723e-11	4.91211e-10	10.6952	9.30873
CONR	CP	ENSMUSG00000018841.17	Rad51d	CP	1.13812	2.10729e-11	5.12488e-10	10.6763	9.29032
CONR	CP	ENSMUSG00000028176.11	Lrrc7	CONR	2.54081	2.17925e-11	5.29314e-10	10.6617	9.27629
CONR	CP	ENSMUSG00000036560.14	Lgi4	CP	2.26409	2.20231e-11	5.34235e-10	10.6571	9.27227
CONR	CP	ENSMUSG00000030148.15	Clec4a2	CP	2.56494	2.26915e-11	5.49751e-10	10.6441	9.25983
CONR	CP	ENSMUSG00000061119.7	Prcp	CP	1.73362	2.27855e-11	5.50676e-10	10.6423	9.2591
CONR	CP	ENSMUSG00000025784.5	Clec3b	CP	1.79188	2.27874e-11	5.50676e-10	10.6423	9.2591
CONR	CP	ENSMUSG00000027078.14	Ube2l6	CP	2.0224	2.31694e-11	5.59199e-10	10.6351	9.25243
CONR	CP	ENSMUSG00000028572.13	Hook1	CP	2.02069	2.33496e-11	5.62838e-10	10.6317	9.24962
CONR	CP	ENSMUSG00000039357.1	Fut11	CP	1.5554	2.3416e-11	5.63726e-10	10.6305	9.24893
CONR	CP	ENSMUSG00000029718.14	Pcolce	CP	1.41497	2.37625e-11	5.71348e-10	10.6241	9.2431
CONR	CP	ENSMUSG00000000120.6	Ngfr	CP	3.04433	2.4291e-11	5.8332e-10	10.6146	9.23409
CONR	CP	ENSMUSG00000021242.9	Npc2	CP	1.26141	2.43267e-11	5.83444e-10	10.6139	9.234
CONR	CP	ENSMUSG00000034641.2	Cd300ld	CP	2.28994	2.45474e-11	5.87997e-10	10.61	9.23062
CONR	CP	ENSMUSG00000022747.16	St3gal6	CP	1.80355	2.5425e-11	6.08257e-10	10.5947	9.21591
CONR	CP	ENSMUSG00000037622.14	Wdtc1	CP	1.32034	2.54664e-11	6.08485e-10	10.594	9.21575
CONR	CP	ENSMUSG00000039349.5	C130074G19Rik	CP	1.34115	2.64585e-11	6.31399e-10	10.5774	9.1997
CONR	CP	ENSMUSG00000033831.5	Fgb	CONR	3.09223	2.65602e-11	6.33035e-10	10.5758	9.19857
CONR	CP	ENSMUSG00000030077.11	Chl1	CP	2.44373	2.75035e-11	6.54701e-10	10.5606	9.18396
CONR	CP	ENSMUSG00000023191.9	P3h3	CP	1.5031	2.814e-11	6.68925e-10	10.5507	9.17462
CONR	CP	ENSMUSG00000042797.9	Aqp11	CP	1.80053	2.81712e-11	6.68925e-10	10.5502	9.17462
CONR	CP	ENSMUSG00000073421.5	H2-Ab1	CP	2.39779	2.8451e-11	6.74731e-10	10.5459	9.17087
CONR	CP	ENSMUSG00000067212.8	H2-T23	CP	2.01834	2.86016e-11	6.77461e-10	10.5436	9.16912
CONR	CP	ENSMUSG00000053388.10	Trim50	CONR	2.66312	2.9471e-11	6.97188e-10	10.5306	9.15665
CONR	CP	ENSMUSG00000018672.15	Copz2	CP	1.73179	2.96023e-11	6.99428e-10	10.5287	9.15526
CONR	CP	ENSMUSG00000020758.15	Itgb4	CP	1.37955	3.04888e-11	7.19482e-10	10.5159	9.14298
CONR	CP	ENSMUSG00000032300.7	1700017B05Rik	CP	1.89421	3.08249e-11	7.26515e-10	10.5111	9.13876
CONR	CP	ENSMUSG00000004952.13	Rasa4	CP	2.38443	3.10215e-11	7.30248e-10	10.5083	9.13653
CONR	CP	ENSMUSG00000005397.8	Nid1	CP	1.5031	3.16401e-11	7.43894e-10	10.4998	9.12849
CONR	CP	ENSMUSG00000051346.9	Spryd4	CP	1.67136	3.18577e-11	7.48089e-10	10.4968	9.12605
CONR	CP	ENSMUSG00000039763.9	Dnajc28	CP	1.64973	3.26719e-11	7.66265e-10	10.4858	9.11562
CONR	CP	ENSMUSG00000025991.8	Cps1	CONR	2.94533	3.33374e-11	7.80913e-10	10.4771	9.1074
CONR	CP	ENSMUSG00000026712.3	Mrc1	CP	2.00792	3.33893e-11	7.8117e-10	10.4764	9.10725
CONR	CP	ENSMUSG00000066235.7	Pomgnt2	CP	1.88196	3.38829e-11	7.91749e-10	10.47	9.10141
CONR	CP	ENSMUSG00000020009.12	Ifngr1	CP	1.62837	3.40195e-11	7.93969e-10	10.4683	9.1002
CONR	CP	ENSMUSG00000029161.7	Cgref1	CP	2.14058	3.53747e-11	8.24588e-10	10.4513	9.08376
CONR	CP	ENSMUSG00000109780.1	Gm45447	CONR	2.34806	3.54727e-11	8.25864e-10	10.4501	9.08309
CONR	CP	ENSMUSG00000008604.11	Ubqln4	CP	1.13252	3.56929e-11	8.29979e-10	10.4474	9.08093
CONR	CP	ENSMUSG00000000318.16	Clec10a	CP	2.91414	3.6564e-11	8.49201e-10	10.4369	9.07099
CONR	CP	ENSMUSG00000029275.18	Gfi1	CP	1.6988	3.75779e-11	8.71688e-10	10.4251	9.05964
CONR	CP	ENSMUSG00000032557.12	Uba5	CP	1.56754	3.97578e-11	9.21137e-10	10.4006	9.03568
CONR	CP	ENSMUSG00000006221.7	Hspb7	CP	4.00597	3.99796e-11	9.25152e-10	10.3982	9.03379
CONR	CP	ENSMUSG00000064345.1	mt-Nd2	CP	1.31141	4.03584e-11	9.32787e-10	10.3941	9.03022
CONR	CP	ENSMUSG00000030731.13	Syt3	CP	2.12175	4.1008e-11	9.46656e-10	10.3871	9.02381
CONR	CP	ENSMUSG00000057191.13	AB124611	CP	2.83856	4.21607e-11	9.70979e-10	10.3751	9.01279
CONR	CP	ENSMUSG00000033420.12	Antxr1	CP	1.76431	4.21634e-11	9.70979e-10	10.3751	9.01279
CONR	CP	ENSMUSG00000060429.11	Sntb1	CP	1.5824	4.2349e-11	9.74077e-10	10.3732	9.01141
CONR	CP	ENSMUSG00000026638.15	Irf6	CP	2.14758	4.34596e-11	9.98421e-10	10.3619	9.00069
CONR	CP	ENSMUSG00000018623.9	Mmp7	CP	4.79411	4.35834e-11	1.00006e-09	10.3607	8.99997
CONR	CP	ENSMUSG00000032725.10	Folr2	CP	3.08567	4.40116e-11	1.00867e-09	10.3564	8.99625
CONR	CP	ENSMUSG00000025481.12	Urah	CP	2.36937	4.40665e-11	1.00872e-09	10.3559	8.99623
CONR	CP	ENSMUSG00000035757.16	Selenoo	CP	1.61523	4.43415e-11	1.0138e-09	10.3532	8.99405
CONR	CP	ENSMUSG00000039911.13	Spsb1	CP	2.06598	4.55529e-11	1.04025e-09	10.3415	8.98286
CONR	CP	ENSMUSG00000039145.16	Camk1d	CP	1.25743	4.56485e-11	1.04119e-09	10.3406	8.98247
CONR	CP	ENSMUSG00000002014.12	Ssr4	CP	1.5081	4.58329e-11	1.04415e-09	10.3388	8.98124
CONR	CP	ENSMUSG00000020658.10	Efr3b	CP	1.65973	4.60064e-11	1.04685e-09	10.3372	8.98011
CONR	CP	ENSMUSG00000024975.12	Pdcd4	CP	1.35336	4.64492e-11	1.05567e-09	10.333	8.97647
CONR	CP	ENSMUSG00000006315.9	Tmem147	CP	1.66977	4.79812e-11	1.08919e-09	10.3189	8.9629
CONR	CP	ENSMUSG00000019158.9	Tmem160	CP	1.70367	4.84295e-11	1.09806e-09	10.3149	8.95937
CONR	CP	ENSMUSG00000001729.14	Akt1	CP	1.0527	4.92168e-11	1.11459e-09	10.3079	8.95289
CONR	CP	ENSMUSG00000035325.16	Sec31a	CP	1.25375	4.97372e-11	1.12504e-09	10.3033	8.94883
CONR	CP	ENSMUSG00000060143.6	Gm10076	CP	1.89964	5.02039e-11	1.13425e-09	10.2993	8.94529
CONR	CP	ENSMUSG00000024682.3	Cblif	CP	5.06245	5.14749e-11	1.16022e-09	10.2884	8.93546
CONR	CP	ENSMUSG00000038264.8	Sema7a	CP	1.7443	5.26311e-11	1.18488e-09	10.2788	8.92632
CONR	CP	ENSMUSG00000038764.14	Ptpn3	CP	1.47049	5.43399e-11	1.22191e-09	10.2649	8.91296
CONR	CP	ENSMUSG00000045973.18	Slc25a51	CP	1.09651	5.44507e-11	1.22296e-09	10.264	8.91259
CONR	CP	ENSMUSG00000040234.16	Tm7sf3	CP	1.32779	5.53833e-11	1.24245e-09	10.2566	8.90572
CONR	CP	ENSMUSG00000023921.8	Mmut	CP	1.34841	5.68869e-11	1.27468e-09	10.245	8.8946
CONR	CP	ENSMUSG00000042759.12	Apobr	CP	2.22542	5.72081e-11	1.28038e-09	10.2425	8.89266
CONR	CP	ENSMUSG00000005672.12	Kit	CP	1.29939	5.80917e-11	1.29863e-09	10.2359	8.88651
CONR	CP	ENSMUSG00000028073.15	Pear1	CP	1.72409	5.82309e-11	1.30022e-09	10.2348	8.88598
CONR	CP	ENSMUSG00000016427.7	Ndufa1	CP	1.37976	5.84436e-11	1.30344e-09	10.2333	8.88491
CONR	CP	ENSMUSG00000001249.14	Hpn	CP	1.89624	5.93151e-11	1.32133e-09	10.2268	8.87899
CONR	CP	ENSMUSG00000024254.15	Abcg8	CONR	4.60948	6.00128e-11	1.33532e-09	10.2218	8.87441
CONR	CP	ENSMUSG00000042303.18	Sgsm3	CP	1.58713	6.03673e-11	1.34164e-09	10.2192	8.87236
CONR	CP	ENSMUSG00000026656.15	Fcgr2b	CP	2.0729	6.13647e-11	1.36222e-09	10.2121	8.86575
CONR	CP	ENSMUSG00000010517.7	Faf1	CP	1.29003	6.15385e-11	1.3645e-09	10.2109	8.86503
CONR	CP	ENSMUSG00000037410.13	Tbc1d2b	CP	1.30326	6.38706e-11	1.41456e-09	10.1947	8.84938
CONR	CP	ENSMUSG00000030980.17	Knop1	CP	1.15387	6.42905e-11	1.42221e-09	10.1919	8.84704
CONR	CP	ENSMUSG00000026278.14	Bok	CP	1.1467	6.51208e-11	1.43891e-09	10.1863	8.84197
CONR	CP	ENSMUSG00000039063.5	Echdc3	CP	1.78602	6.5339e-11	1.44131e-09	10.1848	8.84124
CONR	CP	ENSMUSG00000018507.16	Trpv2	CP	2.63061	6.53803e-11	1.44131e-09	10.1846	8.84124
CONR	CP	ENSMUSG00000010307.7	Tmem86a	CP	2.38639	6.60667e-11	1.45476e-09	10.18	8.83721
CONR	CP	ENSMUSG00000067149.6	Jchain	CP	3.05405	6.66673e-11	1.4663e-09	10.1761	8.83378
CONR	CP	ENSMUSG00000015087.14	Rabl6	CP	1.19993	6.71104e-11	1.47434e-09	10.1732	8.8314
CONR	CP	ENSMUSG00000034810.7	Scn7a	CP	1.74754	6.76139e-11	1.4837e-09	10.17	8.82865
CONR	CP	ENSMUSG00000038578.15	Susd1	CP	2.16935	7.01891e-11	1.53844e-09	10.1537	8.81292
CONR	CP	ENSMUSG00000030116.14	Mfap5	CP	2.19556	7.16648e-11	1.56898e-09	10.1447	8.80438
CONR	CP	ENSMUSG00000028926.15	Cdk14	CP	1.5682	7.1897e-11	1.57226e-09	10.1433	8.80347
CONR	CP	ENSMUSG00000041261.9	Car8	CP	1.9691	7.26961e-11	1.58792e-09	10.1385	8.79917
CONR	CP	ENSMUSG00000074093.4	Svip	CP	1.81113	7.47322e-11	1.63053e-09	10.1265	8.78767
CONR	CP	ENSMUSG00000026946.9	Nmi	CP	2.09314	7.74342e-11	1.68755e-09	10.1111	8.77274
CONR	CP	ENSMUSG00000036103.8	Colec12	CP	1.88184	7.98457e-11	1.73812e-09	10.0977	8.75992
CONR	CP	ENSMUSG00000075334.2	Rprm	CONR	3.20905	8.12392e-11	1.76644e-09	10.0902	8.7529
CONR	CP	ENSMUSG00000036323.14	Srp72	CP	1.03654	8.21648e-11	1.78454e-09	10.0853	8.74847
CONR	CP	ENSMUSG00000054072.11	Iigp1	CP	1.82505	8.25072e-11	1.78793e-09	10.0835	8.74765
CONR	CP	ENSMUSG00000009281.6	Rarres2	CP	2.00189	8.25083e-11	1.78793e-09	10.0835	8.74765
CONR	CP	ENSMUSG00000040852.5	Plekhh2	CP	2.26007	8.47525e-11	1.83448e-09	10.0718	8.73649
CONR	CP	ENSMUSG00000079469.10	Pigb	CP	1.45439	8.92108e-11	1.92879e-09	10.0496	8.71471
CONR	CP	ENSMUSG00000023074.11	Mospd1	CP	1.38543	9.01447e-11	1.94678e-09	10.0451	8.71068
CONR	CP	ENSMUSG00000009563.16	Tor2a	CP	1.23702	9.05417e-11	1.95314e-09	10.0432	8.70927
CONR	CP	ENSMUSG00000029838.11	Ptn	CP	2.68475	9.07044e-11	1.95444e-09	10.0424	8.70898
CONR	CP	ENSMUSG00000046727.12	Cystm1	CP	1.76542	9.34402e-11	2.01024e-09	10.0295	8.69675
CONR	CP	ENSMUSG00000020627.10	Klhl29	CP	3.05976	9.35045e-11	2.01024e-09	10.0292	8.69675
CONR	CP	ENSMUSG00000034041.4	Lyl1	CP	2.61142	9.39975e-11	2.01857e-09	10.0269	8.69496
CONR	CP	ENSMUSG00000078771.10	Evi2a	CP	2.84123	9.44108e-11	2.02517e-09	10.025	8.69354
CONR	CP	ENSMUSG00000068740.13	Celsr2	CP	2.03962	9.49332e-11	2.03409e-09	10.0226	8.69163
CONR	CP	ENSMUSG00000060519.11	Tor3a	CP	1.99523	9.51163e-11	2.03572e-09	10.0217	8.69128
CONR	CP	ENSMUSG00000038628.8	Polr3k	CP	1.24293	9.53047e-11	2.03747e-09	10.0209	8.69091
CONR	CP	ENSMUSG00000071540.3	3425401B19Rik	CP	2.14095	9.67611e-11	2.06629e-09	10.0143	8.68481
CONR	CP	ENSMUSG00000063681.14	Crb1	CONR	3.11685	9.74765e-11	2.07924e-09	10.0111	8.68209
CONR	CP	ENSMUSG00000063252.6	Gm4744	CP	3.35663	9.77014e-11	2.08172e-09	10.0101	8.68158
CONR	CP	ENSMUSG00000007415.15	Gatad1	CP	1.09327	1.04498e-10	2.22404e-09	9.98089	8.65286
CONR	CP	ENSMUSG00000028179.12	Cth	CP	2.31994	1.1124e-10	2.3649e-09	9.95374	8.62619
CONR	CP	ENSMUSG00000013236.16	Ptprs	CP	1.84808	1.1145e-10	2.36559e-09	9.95292	8.62606
CONR	CP	ENSMUSG00000027429.16	Sec23b	CP	1.34114	1.1152e-10	2.36559e-09	9.95265	8.62606
CONR	CP	ENSMUSG00000076655.2	Ighv4-1	CP	3.75407	1.14016e-10	2.41584e-09	9.94304	8.61693
CONR	CP	ENSMUSG00000026958.13	Dpp7	CP	1.48823	1.19554e-10	2.53039e-09	9.92244	8.59681
CONR	CP	ENSMUSG00000028889.17	Yrdc	CP	1.53172	1.22412e-10	2.58801e-09	9.91218	8.58703
CONR	CP	ENSMUSG00000038859.7	Baiap2l1	CP	2.15725	1.22657e-10	2.59031e-09	9.91131	8.58665
CONR	CP	ENSMUSG00000030105.8	Arl8b	CP	1.07157	1.23199e-10	2.59888e-09	9.90939	8.58521
CONR	CP	ENSMUSG00000028128.13	F3	CP	2.13252	1.30083e-10	2.74107e-09	9.88578	8.56208
CONR	CP	ENSMUSG00000004105.8	Angptl2	CP	1.64163	1.34952e-10	2.84055e-09	9.86982	8.5466
CONR	CP	ENSMUSG00000029090.12	Adgra3	CP	1.85078	1.39766e-10	2.93677e-09	9.8546	8.53213
CONR	CP	ENSMUSG00000001334.9	Fndc5	CP	2.64452	1.39832e-10	2.93677e-09	9.85439	8.53213
CONR	CP	ENSMUSG00000015852.13	Fcrls	CP	2.27311	1.41376e-10	2.96594e-09	9.84963	8.52784
CONR	CP	ENSMUSG00000078921.3	Tgtp2	CP	1.98131	1.43279e-10	3.00257e-09	9.84382	8.52251
CONR	CP	ENSMUSG00000002496.9	Tsc2	CP	1.27526	1.44394e-10	3.02261e-09	9.84045	8.51962
CONR	CP	ENSMUSG00000028161.17	Ppp3ca	CP	1.05877	1.47247e-10	3.07657e-09	9.83195	8.51193
CONR	CP	ENSMUSG00000023411.11	Nfatc4	CP	1.94911	1.47294e-10	3.07657e-09	9.83182	8.51193
CONR	CP	ENSMUSG00000038879.7	Nipal2	CP	2.08904	1.47471e-10	3.07692e-09	9.83129	8.51188
CONR	CP	ENSMUSG00000068739.13	Sars	CP	1.27847	1.4851e-10	3.0952e-09	9.82824	8.50931
CONR	CP	ENSMUSG00000025533.15	Asl	CP	1.31769	1.59039e-10	3.31102e-09	9.7985	8.48004
CONR	CP	ENSMUSG00000074768.6	Bhmt	CONR	3.26942	1.60148e-10	3.33048e-09	9.79548	8.47749
CONR	CP	ENSMUSG00000037053.6	Azgp1	CONR	2.57894	1.6505e-10	3.42869e-09	9.78238	8.46487
CONR	CP	ENSMUSG00000019852.7	Arfgef3	CP	2.26812	1.65373e-10	3.43166e-09	9.78154	8.4645
CONR	CP	ENSMUSG00000024659.14	Anxa1	CP	2.15423	1.65945e-10	3.4398e-09	9.78004	8.46347
CONR	CP	ENSMUSG00000027408.7	Cpxm1	CP	2.45794	1.67466e-10	3.46756e-09	9.77607	8.45998
CONR	CP	ENSMUSG00000020695.14	Mrc2	CP	1.76201	1.68898e-10	3.49342e-09	9.77238	8.45675
CONR	CP	ENSMUSG00000040462.13	Os9	CP	1.38941	1.71326e-10	3.53981e-09	9.76618	8.45102
CONR	CP	ENSMUSG00000028538.12	St3gal3	CP	1.30476	1.71967e-10	3.54921e-09	9.76456	8.44987
CONR	CP	ENSMUSG00000020303.2	Stc2	CP	1.38512	1.734e-10	3.57493e-09	9.76095	8.44673
CONR	CP	ENSMUSG00000006818.4	Sod2	CP	1.12409	1.78137e-10	3.66863e-09	9.74924	8.4355
CONR	CP	ENSMUSG00000025192.13	Entpd7	CP	1.9374	1.80058e-10	3.70419e-09	9.74459	8.43131
CONR	CP	ENSMUSG00000035934.16	Pknox2	CP	2.40742	1.82543e-10	3.75126e-09	9.73864	8.42582
CONR	CP	ENSMUSG00000035692.6	Isg15	CP	2.14399	1.83424e-10	3.76532e-09	9.73654	8.4242
CONR	CP	ENSMUSG00000024713.15	Pcsk5	CP	2.61022	1.83894e-10	3.77092e-09	9.73543	8.42355
CONR	CP	ENSMUSG00000020309.6	Chac2	CP	2.23421	1.84796e-10	3.78534e-09	9.73331	8.4219
CONR	CP	ENSMUSG00000057596.13	Trim30d	CP	1.72434	1.87657e-10	3.83818e-09	9.72663	8.41587
CONR	CP	ENSMUSG00000025224.14	Gbf1	CP	1.17238	1.87777e-10	3.83818e-09	9.72636	8.41587
CONR	CP	ENSMUSG00000098557.1	Kctd12	CP	1.84369	1.90911e-10	3.89805e-09	9.71917	8.40915
CONR	CP	ENSMUSG00000079497.4	Gm13420	CONR	2.6798	1.91894e-10	3.91393e-09	9.71694	8.40739
CONR	CP	ENSMUSG00000018339.11	Gpx3	CP	1.58307	1.94226e-10	3.95727e-09	9.71169	8.4026
CONR	CP	ENSMUSG00000052384.13	Nrros	CP	2.21552	1.95298e-10	3.97487e-09	9.7093	8.40068
CONR	CP	ENSMUSG00000030711.15	Sult1a1	CP	1.37774	1.99399e-10	4.05122e-09	9.70028	8.39241
CONR	CP	ENSMUSG00000061535.11	C1qtnf7	CP	2.40494	1.99473e-10	4.05122e-09	9.70012	8.39241
CONR	CP	ENSMUSG00000076617.9	Ighm	CP	2.53051	2.0089e-10	4.07566e-09	9.69704	8.3898
CONR	CP	ENSMUSG00000053647.4	Gper1	CONR	2.56888	2.02569e-10	4.10101e-09	9.69343	8.38711
CONR	CP	ENSMUSG00000071253.8	Slc25a16	CP	1.49334	2.14008e-10	4.32798e-09	9.66957	8.36371
CONR	CP	ENSMUSG00000027937.15	Jtb	CP	1.25809	2.1452e-10	4.33375e-09	9.66853	8.36314
CONR	CP	ENSMUSG00000027601.13	Mtfr1	CP	1.56606	2.18607e-10	4.41166e-09	9.66034	8.3554
CONR	CP	ENSMUSG00000052911.9	Lamb2	CP	1.34027	2.21421e-10	4.46374e-09	9.65478	8.3503
CONR	CP	ENSMUSG00000029860.16	Zyx	CP	1.37194	2.23477e-10	4.50042e-09	9.65077	8.34675
CONR	CP	ENSMUSG00000036885.14	Arhgef26	CP	1.88712	2.26187e-10	4.5502e-09	9.64553	8.34197
CONR	CP	ENSMUSG00000026519.16	Tmem63a	CP	1.25337	2.27556e-10	4.57293e-09	9.64291	8.33981
CONR	CP	ENSMUSG00000021186.9	Fbln5	CP	1.28173	2.30733e-10	4.63189e-09	9.63689	8.33424
CONR	CP	ENSMUSG00000051615.13	Rap2a	CP	1.26679	2.34803e-10	4.70864e-09	9.6293	8.3271
CONR	CP	ENSMUSG00000022875.17	Kng1	CONR	3.20651	2.38757e-10	4.7829e-09	9.62204	8.32031
CONR	CP	ENSMUSG00000020847.15	Rph3al	CP	1.75975	2.45258e-10	4.90798e-09	9.61038	8.3091
CONR	CP	ENSMUSG00000056529.7	Ptafr	CP	2.22374	2.45987e-10	4.91741e-09	9.60909	8.30826
CONR	CP	ENSMUSG00000036764.12	Dnajc12	CP	1.75996	2.53937e-10	5.07104e-09	9.59527	8.2949
CONR	CP	ENSMUSG00000027514.14	Zbp1	CP	2.46471	2.57126e-10	5.12936e-09	9.58985	8.28994
CONR	CP	ENSMUSG00000038668.14	Lpar1	CP	1.77222	2.5751e-10	5.13165e-09	9.58921	8.28974
CONR	CP	ENSMUSG00000021662.9	Arhgef28	CP	2.06312	2.68778e-10	5.35061e-09	9.57061	8.2716
CONR	CP	ENSMUSG00000046807.10	Lrrc75b	CP	1.87168	2.74795e-10	5.4647e-09	9.56099	8.26243
CONR	CP	ENSMUSG00000058558.12	Rpl5	CP	1.21048	2.79669e-10	5.55583e-09	9.55336	8.25525
CONR	CP	ENSMUSG00000051790.15	Nlgn2	CP	1.55257	2.82908e-10	5.61433e-09	9.54836	8.2507
CONR	CP	ENSMUSG00000029163.9	Emilin1	CP	1.28288	2.91139e-10	5.77168e-09	9.5359	8.2387
CONR	CP	ENSMUSG00000022957.19	Itsn1	CP	1.39139	2.92965e-10	5.79645e-09	9.53318	8.23684
CONR	CP	ENSMUSG00000020775.13	Mrpl38	CP	1.14064	2.92996e-10	5.79645e-09	9.53314	8.23684
CONR	CP	ENSMUSG00000031167.16	Rbm3	CP	1.49721	2.94084e-10	5.81197e-09	9.53153	8.23568
CONR	CP	ENSMUSG00000041654.15	Slc39a11	CP	1.75141	2.96203e-10	5.84779e-09	9.52841	8.23301
CONR	CP	ENSMUSG00000040010.10	Slc7a5	CP	1.57846	3.00533e-10	5.92714e-09	9.52211	8.22715
CONR	CP	ENSMUSG00000026837.15	Col5a1	CP	1.70857	3.04631e-10	6.00177e-09	9.51623	8.22172
CONR	CP	ENSMUSG00000011171.11	Vipr2	CP	1.81714	3.07e-10	6.0422e-09	9.51286	8.2188
CONR	CP	ENSMUSG00000031960.14	Aars	CP	1.21186	3.12891e-10	6.1518e-09	9.50461	8.211
CONR	CP	ENSMUSG00000068245.14	Phf11d	CP	2.11557	3.14431e-10	6.17571e-09	9.50248	8.20931
CONR	CP	ENSMUSG00000021390.6	Ogn	CP	2.51939	3.19652e-10	6.27181e-09	9.49532	8.20261
CONR	CP	ENSMUSG00000006930.15	Hap1	CP	1.58919	3.19984e-10	6.27188e-09	9.49487	8.2026
CONR	CP	ENSMUSG00000080115.3	Eef1akmt3	CP	2.08335	3.24117e-10	6.34637e-09	9.4893	8.19747
CONR	CP	ENSMUSG00000021556.11	Golm1	CP	2.00604	3.32519e-10	6.50423e-09	9.47818	8.1868
CONR	CP	ENSMUSG00000032353.9	Tmed3	CP	1.4298	3.3519e-10	6.54975e-09	9.47471	8.18378
CONR	CP	ENSMUSG00000022094.15	Slc39a14	CP	1.45003	3.44583e-10	6.72641e-09	9.46271	8.17222
CONR	CP	ENSMUSG00000066809.1	Gm10180	CONR	3.24247	3.47289e-10	6.77231e-09	9.45931	8.16926
CONR	CP	ENSMUSG00000021423.5	Ly86	CP	2.44482	3.50266e-10	6.8234e-09	9.4556	8.166
CONR	CP	ENSMUSG00000007039.12	Ddah2	CP	1.31917	3.52815e-10	6.86604e-09	9.45245	8.16329
CONR	CP	ENSMUSG00000018819.10	Lsp1	CP	2.35947	3.54416e-10	6.89019e-09	9.45049	8.16177
CONR	CP	ENSMUSG00000015202.13	Cnksr3	CP	1.30254	3.56367e-10	6.92107e-09	9.4481	8.15983
CONR	CP	ENSMUSG00000064127.13	Med14	CP	1.0577	3.58019e-10	6.94607e-09	9.44609	8.15826
CONR	CP	ENSMUSG00000090124.7	Ugt1a7c	CP	3.02355	3.58521e-10	6.94875e-09	9.44549	8.15809
CONR	CP	ENSMUSG00000110803.1	Gm20275	CONR	2.97165	3.7676e-10	7.29485e-09	9.42394	8.13698
CONR	CP	ENSMUSG00000001768.15	Rin2	CP	1.75844	3.91812e-10	7.5786e-09	9.40692	8.12041
CONR	CP	ENSMUSG00000032757.6	Bet1	CP	1.36953	4.0478e-10	7.82152e-09	9.39278	8.10671
CONR	CP	ENSMUSG00000031616.7	Ednra	CP	2.79129	4.08219e-10	7.87999e-09	9.38911	8.10347
CONR	CP	ENSMUSG00000030082.14	Sec61a1	CP	1.30025	4.2121e-10	8.12254e-09	9.3755	8.09031
CONR	CP	ENSMUSG00000020149.17	Rab1a	CP	1.25821	4.28022e-10	8.24559e-09	9.36853	8.08378
CONR	CP	ENSMUSG00000041268.17	Dmxl2	CP	1.78914	4.2898e-10	8.2557e-09	9.36756	8.08325
CONR	CP	ENSMUSG00000030397.10	Mark4	CP	1.15619	4.29741e-10	8.26203e-09	9.36679	8.08291
CONR	CP	ENSMUSG00000054942.13	Miga1	CP	1.34816	4.33418e-10	8.32432e-09	9.36309	8.07965
CONR	CP	ENSMUSG00000002250.15	Ppard	CP	1.23081	4.40497e-10	8.45178e-09	9.35606	8.07305
CONR	CP	ENSMUSG00000024087.3	Cyp1b1	CP	2.0648	4.4459e-10	8.52175e-09	9.35204	8.06947
CONR	CP	ENSMUSG00000049550.17	Clip1	CP	1.03635	4.50968e-10	8.63533e-09	9.34585	8.06372
CONR	CP	ENSMUSG00000021248.9	Tmed10	CP	1.52626	4.5292e-10	8.66402e-09	9.34398	8.06228
CONR	CP	ENSMUSG00000020142.12	Slc1a4	CP	2.08149	4.60625e-10	8.80259e-09	9.33665	8.05539
CONR	CP	ENSMUSG00000002279.18	Lmf1	CP	1.44748	4.67617e-10	8.92727e-09	9.33011	8.04928
CONR	CP	ENSMUSG00000048970.9	C1galt1c1	CP	1.4397	4.71673e-10	8.99104e-09	9.32636	8.04619
CONR	CP	ENSMUSG00000020988.9	L2hgdh	CP	1.56871	4.71899e-10	8.99104e-09	9.32615	8.04619
CONR	CP	ENSMUSG00000026556.15	Vangl2	CP	2.50557	4.73312e-10	9.00897e-09	9.32485	8.04532
CONR	CP	ENSMUSG00000038658.15	Ric1	CP	1.27099	4.81178e-10	9.14958e-09	9.31769	8.0386
CONR	CP	ENSMUSG00000056498.13	Tmem154	CP	2.3425	4.82757e-10	9.17045e-09	9.31627	8.03761
CONR	CP	ENSMUSG00000031958.16	Ldhd	CP	1.51298	4.89579e-10	9.29081e-09	9.31018	8.03195
CONR	CP	ENSMUSG00000015149.14	Sirt2	CP	1.16783	4.99914e-10	9.47752e-09	9.3011	8.02331
CONR	CP	ENSMUSG00000001700.9	Gramd3	CP	1.11383	5.13614e-10	9.72759e-09	9.28936	8.01199
CONR	CP	ENSMUSG00000059326.6	Csf2ra	CP	1.97428	5.39469e-10	1.02071e-08	9.26803	7.9911
CONR	CP	ENSMUSG00000040181.14	Fmo1	CP	1.90495	5.40336e-10	1.02134e-08	9.26734	7.99083
CONR	CP	ENSMUSG00000026342.10	Slc35f5	CP	1.49398	5.47068e-10	1.03304e-08	9.26196	7.98588
CONR	CP	ENSMUSG00000032186.15	Tmod2	CP	1.57641	5.5144e-10	1.04027e-08	9.2585	7.98285
CONR	CP	ENSMUSG00000026193.15	Fn1	CP	1.91287	5.5253e-10	1.0413e-08	9.25764	7.98242
CONR	CP	ENSMUSG00000019467.15	Arhgef25	CP	2.142	5.60832e-10	1.0559e-08	9.25117	7.97638
CONR	CP	ENSMUSG00000001604.14	Tcea3	CP	1.76615	5.71563e-10	1.07505e-08	9.24294	7.96857
CONR	CP	ENSMUSG00000026811.18	St6galnac6	CP	1.48154	5.89733e-10	1.10704e-08	9.22934	7.95584
CONR	CP	ENSMUSG00000002732.14	Fkbp7	CP	2.13224	5.90368e-10	1.10714e-08	9.22888	7.9558
CONR	CP	ENSMUSG00000030123.15	Plxnd1	CP	1.18814	6.06552e-10	1.13638e-08	9.21713	7.94448
CONR	CP	ENSMUSG00000041117.8	Ccdc8	CP	2.26276	6.09016e-10	1.13918e-08	9.21537	7.94341
CONR	CP	ENSMUSG00000027709.9	Mccc1	CP	1.31925	6.0924e-10	1.13918e-08	9.21521	7.94341
CONR	CP	ENSMUSG00000021610.8	Clptm1l	CP	1.1728	6.18802e-10	1.15593e-08	9.20845	7.93707
CONR	CP	ENSMUSG00000039997.16	Ifi203	CP	2.09731	6.21849e-10	1.16048e-08	9.20631	7.93536
CONR	CP	ENSMUSG00000026880.11	Stom	CP	1.6181	6.42503e-10	1.1971e-08	9.19213	7.92187
CONR	CP	ENSMUSG00000035506.16	Slc12a8	CP	1.78784	6.42725e-10	1.1971e-08	9.19197	7.92187
CONR	CP	ENSMUSG00000015745.9	Plekho1	CP	2.10274	6.4656e-10	1.20307e-08	9.18939	7.91971
CONR	CP	ENSMUSG00000017639.13	Rab11fip4	CP	1.46336	6.48287e-10	1.20511e-08	9.18823	7.91897
CONR	CP	ENSMUSG00000046062.5	Ppp1r15b	CP	1.23185	6.6905e-10	1.24249e-08	9.17454	7.90571
CONR	CP	ENSMUSG00000041308.6	Sntb2	CP	1.39293	6.77185e-10	1.25638e-08	9.16929	7.90088
CONR	CP	ENSMUSG00000044674.6	Fzd1	CP	2.0968	6.82661e-10	1.26531e-08	9.1658	7.8978
CONR	CP	ENSMUSG00000019810.15	Fuca2	CP	1.58883	6.91684e-10	1.28079e-08	9.16009	7.89252
CONR	CP	ENSMUSG00000018920.11	Cxcl16	CP	2.26858	6.94032e-10	1.28345e-08	9.15862	7.89162
CONR	CP	ENSMUSG00000074238.6	Ap1ar	CP	1.15497	6.94463e-10	1.28345e-08	9.15835	7.89162
CONR	CP	ENSMUSG00000045817.8	Zfp36l2	CP	1.12588	7.05238e-10	1.3021e-08	9.15166	7.88536
CONR	CP	ENSMUSG00000037300.18	Ttc13	CP	1.1868	7.16789e-10	1.32215e-08	9.14461	7.87872
CONR	CP	ENSMUSG00000027244.14	Atg13	CP	1.00422	7.33705e-10	1.35204e-08	9.13448	7.86901
CONR	CP	ENSMUSG00000054342.8	Kcnn4	CP	2.08266	7.71809e-10	1.41952e-08	9.11249	7.84786
CONR	CP	ENSMUSG00000042747.12	Krtcap2	CP	1.42878	7.81902e-10	1.4367e-08	9.10685	7.84263
CONR	CP	ENSMUSG00000013150.15	Gfod2	CP	1.4477	7.93434e-10	1.45649e-08	9.10049	7.83669
CONR	CP	ENSMUSG00000027313.3	Chac1	CONR	2.63518	8.05374e-10	1.47698e-08	9.094	7.83062
CONR	CP	ENSMUSG00000022306.8	Zfpm2	CP	2.92521	8.13198e-10	1.4899e-08	9.0898	7.82684
CONR	CP	ENSMUSG00000020363.6	Gfpt2	CP	1.59289	8.46623e-10	1.54965e-08	9.07231	7.80977
CONR	CP	ENSMUSG00000025204.10	Ndufb8	CP	1.47243	8.49776e-10	1.55393e-08	9.0707	7.80857
CONR	CP	ENSMUSG00000032334.10	Loxl1	CP	1.83725	8.57415e-10	1.56618e-08	9.06681	7.80516
CONR	CP	ENSMUSG00000026110.15	Mgat4a	CP	1.18409	8.58112e-10	1.56618e-08	9.06646	7.80516
CONR	CP	ENSMUSG00000028859.14	Csf3r	CP	2.90735	8.64239e-10	1.57585e-08	9.06337	7.80248
CONR	CP	ENSMUSG00000021319.7	Sfrp4	CP	1.90462	8.68286e-10	1.58172e-08	9.06134	7.80087
CONR	CP	ENSMUSG00000024610.14	Cd74	CP	2.35139	8.81672e-10	1.60458e-08	9.05469	7.79464
CONR	CP	ENSMUSG00000029196.9	Tada2b	CP	1.14856	9.00796e-10	1.63713e-08	9.04537	7.78592
CONR	CP	ENSMUSG00000025780.7	Itih5	CP	1.59335	9.01273e-10	1.63713e-08	9.04514	7.78592
CONR	CP	ENSMUSG00000024164.15	C3	CP	1.83442	9.02197e-10	1.63725e-08	9.0447	7.78589
CONR	CP	ENSMUSG00000031343.13	Gabra3	CP	2.05891	9.12176e-10	1.65378e-08	9.03992	7.78152
CONR	CP	ENSMUSG00000061838.7	Suclg2	CP	1.21283	9.36908e-10	1.69701e-08	9.0283	7.77032
CONR	CP	ENSMUSG00000062054.7	Iah1	CP	1.11745	9.42185e-10	1.70495e-08	9.02586	7.76829
CONR	CP	ENSMUSG00000082292.3	Gm12250	CP	2.95075	9.80492e-10	1.77259e-08	9.00856	7.75139
CONR	CP	ENSMUSG00000042406.7	Atf4	CP	1.28834	9.91024e-10	1.78994e-08	9.00392	7.74716
CONR	CP	ENSMUSG00000020918.14	Kat2a	CP	1.01853	1.00574e-09	1.8148e-08	8.99751	7.74117
CONR	CP	ENSMUSG00000023030.16	Slc11a2	CP	1.20528	1.00964e-09	1.82012e-08	8.99583	7.7399
CONR	CP	ENSMUSG00000002325.14	Irf9	CP	1.57286	1.01161e-09	1.82195e-08	8.99499	7.73946
CONR	CP	ENSMUSG00000068290.11	Ddrgk1	CP	1.12533	1.02136e-09	1.83778e-08	8.99082	7.73571
CONR	CP	ENSMUSG00000031595.9	Pdgfrl	CP	3.62286	1.03059e-09	1.85264e-08	8.98691	7.73221
CONR	CP	ENSMUSG00000026131.18	Dst	CP	1.58545	1.03365e-09	1.85638e-08	8.98563	7.73133
CONR	CP	ENSMUSG00000060671.12	Atp8b2	CP	1.52558	1.05165e-09	1.88694e-08	8.97813	7.72424
CONR	CP	ENSMUSG00000038844.9	Kif16b	CP	1.40341	1.06046e-09	1.89792e-08	8.97451	7.72172
CONR	CP	ENSMUSG00000040747.9	Cd53	CP	2.67388	1.06075e-09	1.89792e-08	8.97439	7.72172
CONR	CP	ENSMUSG00000024712.9	Rfk	CP	1.00247	1.06308e-09	1.90031e-08	8.97343	7.72118
CONR	CP	ENSMUSG00000056427.10	Slit3	CP	1.65793	1.07109e-09	1.91283e-08	8.97018	7.71832
CONR	CP	ENSMUSG00000042726.14	Trafd1	CP	1.35748	1.1328e-09	2.02114e-08	8.94585	7.6944
CONR	CP	ENSMUSG00000036136.9	Fam110c	CP	1.88955	1.15301e-09	2.05528e-08	8.93817	7.68713
CONR	CP	ENSMUSG00000045680.8	Tcf21	CP	2.42715	1.17102e-09	2.08544e-08	8.93144	7.6808
CONR	CP	ENSMUSG00000025650.12	Col7a1	CP	1.93853	1.1989e-09	2.13311e-08	8.92122	7.67099
CONR	CP	ENSMUSG00000031827.13	Cotl1	CP	2.39349	1.24195e-09	2.20764e-08	8.9059	7.65607
CONR	CP	ENSMUSG00000020198.8	Ap3d1	CP	1.00507	1.24546e-09	2.21182e-08	8.90467	7.65525
CONR	CP	ENSMUSG00000009092.5	Derl3	CP	1.66346	1.25543e-09	2.22746e-08	8.90121	7.65219
CONR	CP	ENSMUSG00000026170.6	Cyp27a1	CP	1.75233	1.27928e-09	2.26766e-08	8.89304	7.64442
CONR	CP	ENSMUSG00000022761.10	Lztr1	CP	1.17047	1.2868e-09	2.27888e-08	8.89049	7.64228
CONR	CP	ENSMUSG00000032470.16	Mras	CP	1.66535	1.29367e-09	2.28771e-08	8.88818	7.6406
CONR	CP	ENSMUSG00000013707.3	Tnfaip8l2	CP	2.61397	1.30736e-09	2.30886e-08	8.88361	7.6366
CONR	CP	ENSMUSG00000025156.17	Gps1	CP	1.31426	1.34128e-09	2.36658e-08	8.87248	7.62588
CONR	CP	ENSMUSG00000025283.15	Sat1	CP	1.15781	1.36247e-09	2.40174e-08	8.86567	7.61947
CONR	CP	ENSMUSG00000036026.15	Tmem63b	CP	1.51427	1.36865e-09	2.41042e-08	8.86371	7.61791
CONR	CP	ENSMUSG00000027111.15	Itga6	CP	1.25917	1.38931e-09	2.44454e-08	8.8572	7.6118
CONR	CP	ENSMUSG00000027931.12	Npr1	CP	1.21819	1.39989e-09	2.46089e-08	8.85391	7.60891
CONR	CP	ENSMUSG00000038828.13	Tmem214	CP	1.22792	1.40854e-09	2.47383e-08	8.85123	7.60663
CONR	CP	ENSMUSG00000059173.19	Pde1a	CP	2.31376	1.42046e-09	2.49246e-08	8.84757	7.60337
CONR	CP	ENSMUSG00000020577.17	Tspan13	CP	1.18477	1.47072e-09	2.57829e-08	8.83247	7.58867
CONR	CP	ENSMUSG00000020570.15	Sypl	CP	1.1368	1.4766e-09	2.5841e-08	8.83074	7.58769
CONR	CP	ENSMUSG00000063564.13	Col23a1	CP	3.06039	1.47674e-09	2.5841e-08	8.8307	7.58769
CONR	CP	ENSMUSG00000019846.11	Lama4	CP	1.29884	1.48064e-09	2.58855e-08	8.82955	7.58694
CONR	CP	ENSMUSG00000022570.5	Tsta3	CP	1.24645	1.48599e-09	2.59551e-08	8.82799	7.58578
CONR	CP	ENSMUSG00000045932.12	Ifit2	CP	2.00834	1.51076e-09	2.63636e-08	8.82081	7.57899
CONR	CP	ENSMUSG00000015947.10	Fcgr1	CP	2.60275	1.53201e-09	2.67101e-08	8.81474	7.57332
CONR	CP	ENSMUSG00000030786.18	Itgam	CP	2.32063	1.56039e-09	2.71802e-08	8.80677	7.56575
CONR	CP	ENSMUSG00000003038.15	Hmgn2	CP	1.25973	1.5724e-09	2.73644e-08	8.80344	7.56281
CONR	CP	ENSMUSG00000066842.18	Hmcn1	CP	2.60691	1.59577e-09	2.77293e-08	8.79703	7.55706
CONR	CP	ENSMUSG00000019806.13	Aig1	CP	1.32851	1.59628e-09	2.77293e-08	8.79689	7.55706
CONR	CP	ENSMUSG00000022389.14	Tef	CP	1.21188	1.61757e-09	2.80508e-08	8.79114	7.55205
CONR	CP	ENSMUSG00000095630.2	Igkv6-23	CP	4.13523	1.61772e-09	2.80508e-08	8.7911	7.55205
CONR	CP	ENSMUSG00000079523.8	Tmsb10	CP	2.195	1.6198e-09	2.80613e-08	8.79054	7.55189
CONR	CP	ENSMUSG00000037742.14	Eef1a1	CP	1.12865	1.62817e-09	2.81809e-08	8.7883	7.55005
CONR	CP	ENSMUSG00000015340.10	Cybb	CP	2.04422	1.63026e-09	2.81913e-08	8.78774	7.54988
CONR	CP	ENSMUSG00000031328.15	Flna	CP	1.98095	1.63483e-09	2.82449e-08	8.78653	7.54906
CONR	CP	ENSMUSG00000004319.15	Clcn3	CP	1.24376	1.64746e-09	2.84372e-08	8.78319	7.54611
CONR	CP	ENSMUSG00000056204.8	Pgpep1	CP	1.31304	1.65633e-09	2.85645e-08	8.78085	7.54417
CONR	CP	ENSMUSG00000029910.14	Mad2l1	CP	1.91716	1.68793e-09	2.90832e-08	8.77265	7.53636
CONR	CP	ENSMUSG00000028600.15	Podn	CP	1.87872	1.72564e-09	2.97062e-08	8.76305	7.52715
CONR	CP	ENSMUSG00000038732.15	Mboat1	CP	2.50091	1.74235e-09	2.99398e-08	8.75887	7.52375
CONR	CP	ENSMUSG00000024867.14	Pip5k1b	CP	2.12021	1.74531e-09	2.99638e-08	8.75813	7.5234
CONR	CP	ENSMUSG00000026269.14	Rnpepl1	CP	1.07951	1.74797e-09	2.99824e-08	8.75747	7.52313
CONR	CP	ENSMUSG00000028664.14	Ephb2	CP	2.26596	1.75685e-09	3.00848e-08	8.75527	7.52165
CONR	CP	ENSMUSG00000040447.15	Spns2	CP	1.05517	1.75709e-09	3.00848e-08	8.75521	7.52165
CONR	CP	ENSMUSG00000030357.10	Fkbp4	CP	1.20253	1.77457e-09	3.03569e-08	8.75091	7.51774
CONR	CP	ENSMUSG00000036968.15	Cnpy4	CP	1.86556	1.77798e-09	3.03881e-08	8.75007	7.5173
CONR	CP	ENSMUSG00000055681.14	Cope	CP	1.22375	1.79698e-09	3.06853e-08	8.74546	7.51307
CONR	CP	ENSMUSG00000030096.8	Slc6a6	CP	1.18329	1.84904e-09	3.1546e-08	8.73305	7.50106
CONR	CP	ENSMUSG00000023307.13	March5	CP	1.23208	1.87138e-09	3.18987e-08	8.72784	7.49623
CONR	CP	ENSMUSG00000019478.16	Rab4a	CP	1.73804	1.90619e-09	3.2463e-08	8.71983	7.48861
CONR	CP	ENSMUSG00000033124.15	Atg9a	CP	1.48957	1.91058e-09	3.25088e-08	8.71884	7.488
CONR	CP	ENSMUSG00000039578.16	Ccser1	CP	1.8492	1.93898e-09	3.29547e-08	8.71243	7.48208
CONR	CP	ENSMUSG00000022472.16	Desi1	CP	1.3403	1.94024e-09	3.29547e-08	8.71214	7.48208
CONR	CP	ENSMUSG00000051177.16	Plcb1	CP	1.404	1.9459e-09	3.30214e-08	8.71088	7.4812
CONR	CP	ENSMUSG00000032690.16	Oas2	CP	2.55052	1.94908e-09	3.30416e-08	8.71017	7.48094
CONR	CP	ENSMUSG00000029925.13	Tbxas1	CP	1.92455	1.95055e-09	3.30416e-08	8.70984	7.48094
CONR	CP	ENSMUSG00000009863.14	Sdhb	CP	1.1472	1.96439e-09	3.32466e-08	8.70677	7.47825
CONR	CP	ENSMUSG00000044308.17	Ubr3	CP	1.02756	1.97147e-09	3.33368e-08	8.70521	7.47708
CONR	CP	ENSMUSG00000036570.14	Fxyd1	CP	1.78877	1.99195e-09	3.36534e-08	8.70072	7.47297
CONR	CP	ENSMUSG00000049037.8	Clec4a1	CP	2.44366	2.01422e-09	3.39996e-08	8.69589	7.46853
CONR	CP	ENSMUSG00000045763.7	Basp1	CP	2.25312	2.02314e-09	3.41199e-08	8.69397	7.46699
CONR	CP	ENSMUSG00000029106.14	Add1	CP	1.19108	2.06136e-09	3.47338e-08	8.68585	7.45925
CONR	CP	ENSMUSG00000032271.13	Nnmt	CP	2.24664	2.07164e-09	3.48763e-08	8.68369	7.45747
CONR	CP	ENSMUSG00000030701.17	Plekhb1	CP	1.4285	2.09445e-09	3.52292e-08	8.67893	7.4531
CONR	CP	ENSMUSG00000029622.16	Arpc1b	CP	1.31725	2.11661e-09	3.55392e-08	8.67436	7.44929
CONR	CP	ENSMUSG00000003355.6	Fkbp11	CP	1.4585	2.19297e-09	3.67569e-08	8.65897	7.43466
CONR	CP	ENSMUSG00000028555.15	Ttc39a	CP	1.40914	2.20226e-09	3.68619e-08	8.65713	7.43342
CONR	CP	ENSMUSG00000086390.7	1810019D21Rik	CONR	2.52793	2.2031e-09	3.68619e-08	8.65697	7.43342
CONR	CP	ENSMUSG00000021385.10	Ippk	CP	1.59135	2.2339e-09	3.73445e-08	8.65094	7.42777
CONR	CP	ENSMUSG00000026748.13	Plxdc2	CP	1.50181	2.23717e-09	3.73665e-08	8.6503	7.42752
CONR	CP	ENSMUSG00000023004.8	Tuba1b	CP	1.38889	2.27219e-09	3.79182e-08	8.64355	7.42115
CONR	CP	ENSMUSG00000001270.9	Ckb	CP	2.1438	2.28244e-09	3.80559e-08	8.6416	7.41958
CONR	CP	ENSMUSG00000056071.12	S100a9	CP	4.0566	2.33168e-09	3.88429e-08	8.63233	7.41069
CONR	CP	ENSMUSG00000017950.16	Hnf4a	CP	2.13215	2.36113e-09	3.92994e-08	8.62688	7.40561
CONR	CP	ENSMUSG00000005125.12	Ndrg1	CP	1.28553	2.42695e-09	4.03597e-08	8.61494	7.39405
CONR	CP	ENSMUSG00000030103.11	Bhlhe40	CP	1.41612	2.44299e-09	4.05911e-08	8.61208	7.39157
CONR	CP	ENSMUSG00000021196.14	Pfkp	CP	1.33675	2.45952e-09	4.07977e-08	8.60915	7.38936
CONR	CP	ENSMUSG00000052302.6	Tbc1d30	CP	1.5901	2.4597e-09	4.07977e-08	8.60912	7.38936
CONR	CP	ENSMUSG00000024357.9	Sil1	CP	1.47371	2.48688e-09	4.12127e-08	8.60434	7.38497
CONR	CP	ENSMUSG00000024991.7	Eif3a	CP	1.00265	2.49892e-09	4.13763e-08	8.60225	7.38325
CONR	CP	ENSMUSG00000031924.4	Cyb5b	CP	1.21649	2.56569e-09	4.2445e-08	8.5908	7.37217
CONR	CP	ENSMUSG00000030774.13	Pak1	CP	1.83222	2.61597e-09	4.32394e-08	8.58237	7.36412
CONR	CP	ENSMUSG00000026938.10	Fcna	CP	1.91248	2.62536e-09	4.3357e-08	8.58081	7.36294
CONR	CP	ENSMUSG00000062785.14	Kcnc3	CP	2.00611	2.69102e-09	4.4403e-08	8.57008	7.35259
CONR	CP	ENSMUSG00000044026.2	Slc35g1	CP	1.64894	2.74046e-09	4.51798e-08	8.56218	7.34506
CONR	CP	ENSMUSG00000023249.15	Parp3	CP	1.8788	2.75992e-09	4.54613e-08	8.5591	7.34236
CONR	CP	ENSMUSG00000043629.12	1700019D03Rik	CP	1.7985	2.79374e-09	4.59787e-08	8.55381	7.33744
CONR	CP	ENSMUSG00000019790.17	Stxbp5	CP	1.11987	2.82691e-09	4.64846e-08	8.54869	7.33269
CONR	CP	ENSMUSG00000020782.18	Llgl2	CP	1.65823	2.85713e-09	4.69411e-08	8.54407	7.32845
CONR	CP	ENSMUSG00000024066.8	Xdh	CP	1.64276	2.89093e-09	4.74556e-08	8.53896	7.32371
CONR	CP	ENSMUSG00000063077.14	Kif1b	CP	1.16195	2.90538e-09	4.76518e-08	8.5368	7.32192
CONR	CP	ENSMUSG00000021760.3	Gpx8	CP	1.75585	2.95146e-09	4.83659e-08	8.52996	7.31546
CONR	CP	ENSMUSG00000052160.7	Pld4	CP	2.30623	2.95526e-09	4.83866e-08	8.5294	7.31527
CONR	CP	ENSMUSG00000039109.15	F13a1	CP	2.06413	2.99413e-09	4.89811e-08	8.52373	7.30997
CONR	CP	ENSMUSG00000028108.15	Ecm1	CP	1.83324	3.01707e-09	4.93141e-08	8.52042	7.30703
CONR	CP	ENSMUSG00000022312.10	Eif3h	CP	1.22198	3.05559e-09	4.9901e-08	8.51491	7.30189
CONR	CP	ENSMUSG00000024165.8	Jpt2	CP	1.25523	3.10372e-09	5.06437e-08	8.50812	7.29547
CONR	CP	ENSMUSG00000003363.15	Pld3	CP	1.2531	3.11517e-09	5.07871e-08	8.50652	7.29425
CONR	CP	ENSMUSG00000061904.12	Slc25a3	CP	1.05097	3.14209e-09	5.11823e-08	8.50278	7.29088
CONR	CP	ENSMUSG00000046314.16	Stxbp6	CP	1.46506	3.201e-09	5.20974e-08	8.49471	7.28318
CONR	CP	ENSMUSG00000076677.1	Ighv6-3	CP	2.69085	3.20971e-09	5.21947e-08	8.49353	7.28237
CONR	CP	ENSMUSG00000040093.15	Bmf	CP	1.31801	3.26292e-09	5.30149e-08	8.48639	7.2756
CONR	CP	ENSMUSG00000031494.7	Cd209a	CP	2.5514	3.28335e-09	5.33013e-08	8.48368	7.27326
CONR	CP	ENSMUSG00000040134.8	Rdh7	CONR	3.47029	3.2942e-09	5.3432e-08	8.48225	7.2722
CONR	CP	ENSMUSG00000047694.12	Yipf6	CP	1.3018	3.29756e-09	5.34412e-08	8.48181	7.27212
CONR	CP	ENSMUSG00000062963.10	Ufc1	CP	1.13043	3.31837e-09	5.37328e-08	8.47908	7.26976
CONR	CP	ENSMUSG00000039234.11	Sec24d	CP	1.27122	3.32371e-09	5.37737e-08	8.47838	7.26943
CONR	CP	ENSMUSG00000024697.3	Gna14	CP	1.70839	3.3297e-09	5.3825e-08	8.47759	7.26902
CONR	CP	ENSMUSG00000032067.6	Pts	CP	1.199	3.35546e-09	5.41954e-08	8.47425	7.26604
CONR	CP	ENSMUSG00000028743.7	Akr7a5	CP	1.24471	3.48803e-09	5.62891e-08	8.45742	7.24958
CONR	CP	ENSMUSG00000024747.3	Aldh1a7	CP	1.76011	3.51011e-09	5.65976e-08	8.45468	7.2472
CONR	CP	ENSMUSG00000050440.8	Hamp	CONR	2.89429	3.56514e-09	5.73879e-08	8.44792	7.24118
CONR	CP	ENSMUSG00000033355.6	Rtp4	CP	2.88291	3.62352e-09	5.82676e-08	8.44087	7.23457
CONR	CP	ENSMUSG00000015134.15	Aldh1a3	CP	2.54809	3.62589e-09	5.82676e-08	8.44058	7.23457
CONR	CP	ENSMUSG00000034645.14	Zyg11a	CONR	2.47254	3.63523e-09	5.83686e-08	8.43947	7.23382
CONR	CP	ENSMUSG00000022594.14	Lynx1	CP	1.24346	3.65859e-09	5.86943e-08	8.43669	7.2314
CONR	CP	ENSMUSG00000052369.7	Tmem106c	CP	1.29845	3.67046e-09	5.88353e-08	8.43528	7.23036
CONR	CP	ENSMUSG00000026223.15	Itm2c	CP	1.11422	3.68779e-09	5.90634e-08	8.43323	7.22868
CONR	CP	ENSMUSG00000032776.9	Mctp2	CP	1.65523	3.72397e-09	5.95928e-08	8.42899	7.22481
CONR	CP	ENSMUSG00000042388.14	Dlgap3	CP	2.27061	3.73303e-09	5.96878e-08	8.42794	7.22411
CONR	CP	ENSMUSG00000022359.9	Wdyhv1	CP	1.29356	3.76674e-09	6.01601e-08	8.42403	7.22069
CONR	CP	ENSMUSG00000042198.12	Chchd7	CP	1.27661	3.76887e-09	6.01601e-08	8.42379	7.22069
CONR	CP	ENSMUSG00000031283.16	Chrdl1	CP	2.35256	3.79152e-09	6.04711e-08	8.42119	7.21845
CONR	CP	ENSMUSG00000031467.10	Agpat5	CP	1.08607	3.80371e-09	6.06148e-08	8.41979	7.21742
CONR	CP	ENSMUSG00000029032.12	Arhgef16	CP	2.01647	3.8134e-09	6.07186e-08	8.41869	7.21668
CONR	CP	ENSMUSG00000031532.6	Saraf	CP	1.10176	3.82225e-09	6.08088e-08	8.41768	7.21603
CONR	CP	ENSMUSG00000002475.15	Abhd3	CONR	2.3176	3.89983e-09	6.19914e-08	8.40895	7.20767
CONR	CP	ENSMUSG00000045319.13	Proser2	CP	1.30944	3.9482e-09	6.27081e-08	8.4036	7.20268
CONR	CP	ENSMUSG00000033149.16	Phldb2	CP	1.77083	3.95252e-09	6.27244e-08	8.40313	7.20256
CONR	CP	ENSMUSG00000020473.13	Aebp1	CP	1.90595	3.96812e-09	6.29198e-08	8.40141	7.20121
CONR	CP	ENSMUSG00000044792.6	Isca1	CP	1.16977	4.04545e-09	6.40926e-08	8.39303	7.19319
CONR	CP	ENSMUSG00000062609.13	Kcnj15	CP	3.21771	4.05693e-09	6.42212e-08	8.3918	7.19232
CONR	CP	ENSMUSG00000027376.15	Prom2	CONR	2.32711	4.07092e-09	6.43893e-08	8.39031	7.19119
CONR	CP	ENSMUSG00000059182.7	Skap2	CP	1.10164	4.0813e-09	6.45e-08	8.3892	7.19044
CONR	CP	ENSMUSG00000028289.12	Epha7	CP	2.06713	4.25516e-09	6.71921e-08	8.37108	7.17268
CONR	CP	ENSMUSG00000046668.8	Cxxc5	CP	1.17192	4.29418e-09	6.77046e-08	8.36712	7.16938
CONR	CP	ENSMUSG00000054312.6	Mrps21	CP	1.46384	4.29471e-09	6.77046e-08	8.36707	7.16938
CONR	CP	ENSMUSG00000034602.15	Mon2	CP	1.00408	4.39077e-09	6.91619e-08	8.35746	7.16013
CONR	CP	ENSMUSG00000043998.10	Mgat2	CP	1.0811	4.45579e-09	7.01281e-08	8.35108	7.15411
CONR	CP	ENSMUSG00000070003.7	Ssbp4	CP	1.21283	4.46866e-09	7.02729e-08	8.34982	7.15321
CONR	CP	ENSMUSG00000095642.3	Ighv14-3	CP	4.84957	4.65887e-09	7.32036e-08	8.33172	7.13547
CONR	CP	ENSMUSG00000027217.13	Tspan18	CP	1.68776	4.69146e-09	7.36551e-08	8.32869	7.1328
CONR	CP	ENSMUSG00000022661.14	Cd200	CP	1.5433	4.73327e-09	7.42506e-08	8.32484	7.1293
CONR	CP	ENSMUSG00000034768.4	Asb16	CP	1.87382	4.7478e-09	7.44173e-08	8.32351	7.12833
CONR	CP	ENSMUSG00000026457.14	Adipor1	CP	1.10769	4.82076e-09	7.54229e-08	8.31688	7.1225
CONR	CP	ENSMUSG00000028700.14	Pomgnt1	CP	1.15071	4.82519e-09	7.54229e-08	8.31649	7.1225
CONR	CP	ENSMUSG00000044433.16	Camsap3	CP	1.82907	4.8291e-09	7.54229e-08	8.31613	7.1225
CONR	CP	ENSMUSG00000021009.15	Ptpn21	CP	1.14559	4.83146e-09	7.54229e-08	8.31592	7.1225
CONR	CP	ENSMUSG00000038515.10	Grtp1	CP	1.68811	4.83171e-09	7.54229e-08	8.3159	7.1225
CONR	CP	ENSMUSG00000007655.16	Cav1	CP	1.63203	4.92007e-09	7.67394e-08	8.30803	7.11498
CONR	CP	ENSMUSG00000051906.15	Cd209f	CP	1.94154	4.95126e-09	7.71629e-08	8.30528	7.11259
CONR	CP	ENSMUSG00000025289.15	Prdx4	CP	1.60236	4.98262e-09	7.75882e-08	8.30254	7.1102
CONR	CP	ENSMUSG00000053746.8	Ptrh1	CP	1.9018	5.00844e-09	7.78922e-08	8.3003	7.10851
CONR	CP	ENSMUSG00000038712.16	Mindy1	CP	1.10423	5.0103e-09	7.78922e-08	8.30014	7.10851
CONR	CP	ENSMUSG00000053094.15	Tmem248	CP	1.04642	5.03853e-09	7.82674e-08	8.2977	7.10642
CONR	CP	ENSMUSG00000026896.14	Ifih1	CP	1.69779	5.05527e-09	7.84635e-08	8.29626	7.10533
CONR	CP	ENSMUSG00000029561.17	Oasl2	CP	2.03261	5.0655e-09	7.85584e-08	8.29538	7.10481
CONR	CP	ENSMUSG00000028914.13	Casp9	CP	1.86794	5.0764e-09	7.86636e-08	8.29444	7.10423
CONR	CP	ENSMUSG00000034614.14	Pik3ip1	CP	1.69031	5.14683e-09	7.96904e-08	8.28846	7.09859
CONR	CP	ENSMUSG00000031877.9	Ces2g	CP	1.43014	5.16794e-09	7.99295e-08	8.28668	7.09729
CONR	CP	ENSMUSG00000031364.2	Grpr	CONR	2.80605	5.17066e-09	7.99295e-08	8.28645	7.09729
CONR	CP	ENSMUSG00000022667.17	Cd200r1	CP	3.54806	5.1941e-09	8.0227e-08	8.28449	7.09568
CONR	CP	ENSMUSG00000071644.10	Eef1g	CP	1.18942	5.2059e-09	8.03442e-08	8.2835	7.09505
CONR	CP	ENSMUSG00000028945.9	Rheb	CP	1.05692	5.22165e-09	8.05223e-08	8.28219	7.09408
CONR	CP	ENSMUSG00000034570.12	Inpp5j	CP	1.94975	5.24023e-09	8.07436e-08	8.28065	7.09289
CONR	CP	ENSMUSG00000016206.6	H2-M3	CP	2.48494	5.26883e-09	8.11187e-08	8.27829	7.09088
CONR	CP	ENSMUSG00000046329.14	Slc25a23	CP	1.19263	5.3774e-09	8.26167e-08	8.26943	7.08293
CONR	CP	ENSMUSG00000040018.9	Cox15	CP	1.20847	5.38157e-09	8.26167e-08	8.26909	7.08293
CONR	CP	ENSMUSG00000054641.10	Mmrn1	CP	1.69207	5.38232e-09	8.26167e-08	8.26903	7.08293
CONR	CP	ENSMUSG00000109957.1	Gm45353	CONR	3.14373	5.38344e-09	8.26167e-08	8.26894	7.08293
CONR	CP	ENSMUSG00000062515.3	Fabp4	CP	2.26316	5.44658e-09	8.35186e-08	8.26388	7.07822
CONR	CP	ENSMUSG00000023122.6	Sult1c2	CP	1.81004	5.49105e-09	8.41329e-08	8.26034	7.07503
CONR	CP	ENSMUSG00000024353.4	Mzb1	CP	2.72742	5.49858e-09	8.41807e-08	8.25975	7.07479
CONR	CP	ENSMUSG00000058886.9	Deaf1	CP	1.05402	5.51089e-09	8.43017e-08	8.25878	7.07416
CONR	CP	ENSMUSG00000032383.7	Ppib	CP	1.29613	5.55175e-09	8.48587e-08	8.25557	7.0713
CONR	CP	ENSMUSG00000011306.7	Sugp1	CP	1.4326	5.55651e-09	8.48635e-08	8.2552	7.07128
CONR	CP	ENSMUSG00000062098.11	Btbd3	CP	1.32984	5.57828e-09	8.51279e-08	8.2535	7.06993
CONR	CP	ENSMUSG00000027296.7	Itpka	CP	1.96141	5.65279e-09	8.6196e-08	8.24774	7.06451
CONR	CP	ENSMUSG00000003500.13	Impdh1	CP	1.27299	5.73464e-09	8.73744e-08	8.24149	7.05862
CONR	CP	ENSMUSG00000022425.15	Enpp2	CP	1.87143	5.76644e-09	8.77888e-08	8.23909	7.05656
CONR	CP	ENSMUSG00000024013.14	Fgd2	CP	2.04221	5.79881e-09	8.82112e-08	8.23666	7.05448
CONR	CP	ENSMUSG00000031558.15	Slit2	CP	1.78297	5.87256e-09	8.9262e-08	8.23117	7.04933
CONR	CP	ENSMUSG00000027803.14	Wwtr1	CP	1.32367	6.01916e-09	9.14175e-08	8.22046	7.03897
CONR	CP	ENSMUSG00000020388.12	Pdlim4	CP	1.7609	6.02793e-09	9.14778e-08	8.21983	7.03868
CONR	CP	ENSMUSG00000000915.15	Hip1r	CP	1.03114	6.04494e-09	9.16633e-08	8.21861	7.0378
CONR	CP	ENSMUSG00000066113.16	Adamtsl1	CP	2.24146	6.08509e-09	9.21809e-08	8.21573	7.03536
CONR	CP	ENSMUSG00000003948.17	Mmd	CP	1.88677	6.08926e-09	9.21809e-08	8.21544	7.03536
CONR	CP	ENSMUSG00000036438.12	Calm2	CP	1.12216	6.09356e-09	9.21809e-08	8.21513	7.03536
CONR	CP	ENSMUSG00000024338.14	Psmb8	CP	2.53666	6.12537e-09	9.25887e-08	8.21287	7.03344
CONR	CP	ENSMUSG00000013419.7	Zfp651	CP	1.42671	6.1375e-09	9.26987e-08	8.21201	7.03293
CONR	CP	ENSMUSG00000006219.12	Fblim1	CP	1.34448	6.15802e-09	9.29351e-08	8.21056	7.03182
CONR	CP	ENSMUSG00000001576.14	Ergic1	CP	1.36241	6.22023e-09	9.37997e-08	8.20619	7.0278
CONR	CP	ENSMUSG00000033538.13	Casp4	CP	2.71229	6.24279e-09	9.40656e-08	8.20462	7.02657
CONR	CP	ENSMUSG00000070730.11	Rmdn3	CP	1.29614	6.30157e-09	9.48763e-08	8.20055	7.02284
CONR	CP	ENSMUSG00000050192.8	Eif5a2	CP	2.61427	6.3456e-09	9.54641e-08	8.19753	7.02016
CONR	CP	ENSMUSG00000052688.12	Rab7b	CP	1.91054	6.38973e-09	9.60522e-08	8.19452	7.01749
CONR	CP	ENSMUSG00000040552.8	C3ar1	CP	2.45096	6.43294e-09	9.66257e-08	8.19159	7.01491
CONR	CP	ENSMUSG00000029594.12	Rbm19	CP	1.21285	6.4648e-09	9.70279e-08	8.18944	7.0131
CONR	CP	ENSMUSG00000031635.14	Anxa10	CP	4.64509	6.85958e-09	1.02872e-07	8.1637	6.9877
CONR	CP	ENSMUSG00000025815.13	Dhtkd1	CP	1.76561	6.88003e-09	1.03098e-07	8.16241	6.98675
CONR	CP	ENSMUSG00000024998.17	Plce1	CP	1.93005	6.95283e-09	1.04107e-07	8.15784	6.98252
CONR	CP	ENSMUSG00000005534.10	Insr	CP	1.35624	7.05473e-09	1.0555e-07	8.15152	6.97654
CONR	CP	ENSMUSG00000030382.15	Slc27a5	CONR	3.05948	7.06058e-09	1.05555e-07	8.15116	6.97652
CONR	CP	ENSMUSG00000058056.16	Palld	CP	1.70971	7.21129e-09	1.07724e-07	8.14199	6.96769
CONR	CP	ENSMUSG00000040412.16	5330417C22Rik	CP	2.01043	7.22637e-09	1.07865e-07	8.14108	6.96712
CONR	CP	ENSMUSG00000026617.16	Bpnt1	CP	1.37502	7.2785e-09	1.08475e-07	8.13796	6.96467
CONR	CP	ENSMUSG00000032902.1	Slc16a1	CP	1.65737	7.27866e-09	1.08475e-07	8.13795	6.96467
CONR	CP	ENSMUSG00000024308.14	Tapbp	CP	1.19867	7.3016e-09	1.08732e-07	8.13658	6.96364
CONR	CP	ENSMUSG00000042613.9	Pbxip1	CP	1.11459	7.50631e-09	1.11694e-07	8.12457	6.95197
CONR	CP	ENSMUSG00000052456.9	Asna1	CP	1.13092	7.63354e-09	1.13498e-07	8.11727	6.94501
CONR	CP	ENSMUSG00000052305.6	Hbb-bs	CP	2.34626	7.70692e-09	1.145e-07	8.11312	6.94119
CONR	CP	ENSMUSG00000027994.14	Mcub	CP	2.36437	7.75101e-09	1.15048e-07	8.11064	6.93912
CONR	CP	ENSMUSG00000031024.13	St5	CP	1.1789	7.75586e-09	1.15048e-07	8.11037	6.93912
CONR	CP	ENSMUSG00000035772.11	Mrps2	CP	1.11239	7.85526e-09	1.16432e-07	8.10484	6.93393
CONR	CP	ENSMUSG00000068328.9	Aup1	CP	1.30259	8.02325e-09	1.1883e-07	8.09565	6.92507
CONR	CP	ENSMUSG00000039501.14	Znfx1	CP	1.39846	8.03783e-09	1.18954e-07	8.09486	6.92462
CONR	CP	ENSMUSG00000046006.5	Gapt	CP	3.77136	8.04858e-09	1.19021e-07	8.09428	6.92438
CONR	CP	ENSMUSG00000032698.15	Lmo2	CP	2.02564	8.09238e-09	1.19508e-07	8.09192	6.9226
CONR	CP	ENSMUSG00000038224.12	Serpinf2	CONR	3.09647	8.09408e-09	1.19508e-07	8.09183	6.9226
CONR	CP	ENSMUSG00000036285.10	Noa1	CP	1.26963	8.20227e-09	1.21012e-07	8.08607	6.91717
CONR	CP	ENSMUSG00000018849.6	Wwc1	CP	1.94507	8.31974e-09	1.2265e-07	8.07989	6.91133
CONR	CP	ENSMUSG00000071074.9	Yipf3	CP	1.28264	8.4051e-09	1.23813e-07	8.07546	6.90723
CONR	CP	ENSMUSG00000022533.13	Atp13a3	CP	1.22401	8.50578e-09	1.252e-07	8.07029	6.9024
CONR	CP	ENSMUSG00000005413.8	Hmox1	CP	1.96033	8.82128e-09	1.29657e-07	8.05447	6.8872
CONR	CP	ENSMUSG00000037025.11	Foxa2	CP	2.03958	8.82221e-09	1.29657e-07	8.05442	6.8872
CONR	CP	ENSMUSG00000020818.16	Mfsd11	CP	1.01492	8.83743e-09	1.29781e-07	8.05367	6.88679
CONR	CP	ENSMUSG00000066150.12	Slc31a1	CP	1.32446	8.93196e-09	1.31068e-07	8.04905	6.8825
CONR	CP	ENSMUSG00000001119.7	Col6a1	CP	1.46605	8.96695e-09	1.31481e-07	8.04736	6.88114
CONR	CP	ENSMUSG00000038811.13	Gngt2	CP	2.24415	9.04495e-09	1.32523e-07	8.04359	6.87771
CONR	CP	ENSMUSG00000043795.9	Prr33	CP	2.17519	9.62157e-09	1.40863e-07	8.01675	6.8512
CONR	CP	ENSMUSG00000076672.7	Ighv3-6	CP	3.19173	9.76104e-09	1.42795e-07	8.0105	6.84529
CONR	CP	ENSMUSG00000021665.8	Hexb	CP	1.79592	9.80664e-09	1.43353e-07	8.00848	6.84359
CONR	CP	ENSMUSG00000021895.9	Arhgef3	CP	1.61906	9.92378e-09	1.44954e-07	8.00332	6.83877
CONR	CP	ENSMUSG00000052698.15	Tln2	CP	1.39128	9.94679e-09	1.45179e-07	8.00232	6.8381
CONR	CP	ENSMUSG00000000631.20	Myo18a	CP	1.0444	1.00231e-08	1.46182e-07	7.999	6.83511
CONR	CP	ENSMUSG00000104597.1	B230334C09Rik	CONR	2.96943	1.00876e-08	1.4701e-07	7.99621	6.83265
CONR	CP	ENSMUSG00000026473.15	Glul	CP	1.30616	1.02428e-08	1.49157e-07	7.98958	6.82636
CONR	CP	ENSMUSG00000053080.10	2700081O15Rik	CP	1.13826	1.02898e-08	1.49727e-07	7.98759	6.8247
CONR	CP	ENSMUSG00000036459.15	Wtip	CP	1.8863	1.03901e-08	1.51072e-07	7.98338	6.82082
CONR	CP	ENSMUSG00000038831.16	Ralgps1	CP	1.4569	1.04195e-08	1.51383e-07	7.98215	6.81992
CONR	CP	ENSMUSG00000016921.14	Srsf6	CP	1.49434	1.06069e-08	1.5399e-07	7.97441	6.81251
CONR	CP	ENSMUSG00000025393.12	Atp5b	CP	1.11467	1.06564e-08	1.54591e-07	7.97239	6.81082
CONR	CP	ENSMUSG00000035000.8	Dpp4	CP	1.38516	1.06835e-08	1.54866e-07	7.97129	6.81005
CONR	CP	ENSMUSG00000020241.13	Col6a2	CP	1.42426	1.07529e-08	1.55754e-07	7.96847	6.80756
CONR	CP	ENSMUSG00000025937.6	Lactb2	CP	1.1596	1.10039e-08	1.59269e-07	7.95845	6.79787
CONR	CP	ENSMUSG00000023992.14	Trem2	CP	3.55232	1.10855e-08	1.60328e-07	7.95525	6.79499
CONR	CP	ENSMUSG00000007097.14	Atp1a2	CP	1.75257	1.11119e-08	1.60588e-07	7.95421	6.79429
CONR	CP	ENSMUSG00000063193.8	Cd300lb	CP	2.78765	1.12727e-08	1.62789e-07	7.94797	6.78837
CONR	CP	ENSMUSG00000037916.13	Ndufv1	CP	1.1729	1.13065e-08	1.63106e-07	7.94667	6.78753
CONR	CP	ENSMUSG00000043017.9	Ptgir	CP	1.95215	1.13117e-08	1.63106e-07	7.94647	6.78753
CONR	CP	ENSMUSG00000000049.11	Apoh	CONR	3.08169	1.1336e-08	1.63332e-07	7.94554	6.78693
CONR	CP	ENSMUSG00000036580.15	Spg20	CP	1.38361	1.14196e-08	1.64293e-07	7.94235	6.78438
CONR	CP	ENSMUSG00000030165.16	Klrd1	CP	4.17085	1.14199e-08	1.64293e-07	7.94234	6.78438
CONR	CP	ENSMUSG00000062078.14	Qk	CP	1.13606	1.1446e-08	1.64425e-07	7.94135	6.78403
CONR	CP	ENSMUSG00000032925.16	Itgbl1	CP	1.95527	1.15049e-08	1.65143e-07	7.93912	6.78214
CONR	CP	ENSMUSG00000040522.5	Tlr8	CP	3.076	1.15758e-08	1.66036e-07	7.93645	6.7798
CONR	CP	ENSMUSG00000056629.15	Fkbp2	CP	1.37657	1.17745e-08	1.68759e-07	7.92906	6.77273
CONR	CP	ENSMUSG00000022214.14	Dcaf11	CP	1.04187	1.18983e-08	1.70406e-07	7.92451	6.76852
CONR	CP	ENSMUSG00000052504.6	Epha3	CP	2.43147	1.19298e-08	1.70728e-07	7.92337	6.76769
CONR	CP	ENSMUSG00000029869.7	Ephb6	CP	2.12761	1.23687e-08	1.76798e-07	7.90768	6.75252
CONR	CP	ENSMUSG00000032231.14	Anxa2	CP	1.50769	1.23725e-08	1.76798e-07	7.90754	6.75252
CONR	CP	ENSMUSG00000005547.14	Cyp2a5	CONR	3.05784	1.23924e-08	1.76951e-07	7.90685	6.75215
CONR	CP	ENSMUSG00000040204.6	Pclaf	CP	3.0624	1.24471e-08	1.77599e-07	7.90493	6.75056
CONR	CP	ENSMUSG00000006057.15	Atp5g1	CP	1.3438	1.25767e-08	1.79315e-07	7.90043	6.74638
CONR	CP	ENSMUSG00000038387.9	Rras	CP	1.45108	1.26009e-08	1.79525e-07	7.8996	6.74588
CONR	CP	ENSMUSG00000056220.14	Pla2g4a	CP	2.09893	1.26424e-08	1.79982e-07	7.89817	6.74477
CONR	CP	ENSMUSG00000058997.7	Vwa8	CP	1.1785	1.27137e-08	1.80862e-07	7.89573	6.74265
CONR	CP	ENSMUSG00000029053.16	Prkcz	CP	1.28991	1.28594e-08	1.82799e-07	7.89078	6.73803
CONR	CP	ENSMUSG00000037254.18	Itih2	CP	2.03879	1.3361e-08	1.89788e-07	7.87416	6.72173
CONR	CP	ENSMUSG00000027030.15	Stk39	CP	1.35619	1.34574e-08	1.91015e-07	7.87104	6.71893
CONR	CP	ENSMUSG00000040891.6	Foxa3	CP	1.49253	1.34891e-08	1.91322e-07	7.87002	6.71823
CONR	CP	ENSMUSG00000030751.18	Psma1	CP	1.07381	1.35541e-08	1.92101e-07	7.86793	6.71647
CONR	CP	ENSMUSG00000030862.13	Cpxm2	CP	2.23916	1.38717e-08	1.96457e-07	7.85787	6.70673
CONR	CP	ENSMUSG00000052738.14	Suclg1	CP	1.0611	1.40132e-08	1.98315e-07	7.85346	6.70264
CONR	CP	ENSMUSG00000038489.8	Polr2l	CP	1.31462	1.41604e-08	2.00249e-07	7.84892	6.69843
CONR	CP	ENSMUSG00000040896.16	Kcnd3	CONR	2.48564	1.41974e-08	2.00623e-07	7.84779	6.69762
CONR	CP	ENSMUSG00000030236.10	Slco1b2	CONR	3.3342	1.43214e-08	2.02226e-07	7.84401	6.69416
CONR	CP	ENSMUSG00000040888.9	Gfer	CP	1.42832	1.45016e-08	2.04619e-07	7.83858	6.68905
CONR	CP	ENSMUSG00000030795.18	Fus	CP	1.09331	1.45787e-08	2.05556e-07	7.83628	6.68707
CONR	CP	ENSMUSG00000053963.7	Stum	CP	3.15613	1.53649e-08	2.16321e-07	7.81347	6.6649
CONR	CP	ENSMUSG00000035027.18	Map2k2	CP	1.0694	1.5612e-08	2.19637e-07	7.80654	6.65829
CONR	CP	ENSMUSG00000025616.14	Usp16	CP	1.12944	1.5739e-08	2.21262e-07	7.80302	6.65509
CONR	CP	ENSMUSG00000073433.10	Arhgdig	CP	1.51728	1.59308e-08	2.23793e-07	7.79776	6.65015
CONR	CP	ENSMUSG00000038462.3	Uqcrfs1	CP	1.13155	1.61105e-08	2.26151e-07	7.79289	6.6456
CONR	CP	ENSMUSG00000033777.3	Tlr13	CP	2.42631	1.61974e-08	2.27204e-07	7.79056	6.64358
CONR	CP	ENSMUSG00000028076.12	Cd1d1	CP	2.24385	1.63037e-08	2.28528e-07	7.78771	6.64106
CONR	CP	ENSMUSG00000021281.15	Tnfaip2	CP	1.38952	1.64794e-08	2.3082e-07	7.78306	6.63673
CONR	CP	ENSMUSG00000019917.10	Sept10	CP	1.64325	1.68096e-08	2.35273e-07	7.77444	6.62843
CONR	CP	ENSMUSG00000020576.10	Nbas	CP	1.30669	1.69097e-08	2.365e-07	7.77186	6.62617
CONR	CP	ENSMUSG00000084989.3	Crocc2	CP	4.61936	1.69685e-08	2.37149e-07	7.77036	6.62498
CONR	CP	ENSMUSG00000026520.8	Pycr2	CP	1.33316	1.70788e-08	2.38516e-07	7.76754	6.62248
CONR	CP	ENSMUSG00000031482.9	Slc25a15	CP	1.48813	1.71493e-08	2.39326e-07	7.76575	6.62101
CONR	CP	ENSMUSG00000074582.10	Arfgef2	CP	1.03598	1.72737e-08	2.40885e-07	7.76262	6.61819
CONR	CP	ENSMUSG00000059908.9	Mug1	CONR	3.03327	1.73109e-08	2.41228e-07	7.76168	6.61757
CONR	CP	ENSMUSG00000032369.13	Plscr1	CP	1.55286	1.73364e-08	2.4132e-07	7.76104	6.61741
CONR	CP	ENSMUSG00000041841.7	Rpl37	CP	1.21602	1.73428e-08	2.4132e-07	7.76088	6.61741
CONR	CP	ENSMUSG00000002007.5	Srpk3	CP	4.12877	1.74236e-08	2.42268e-07	7.75886	6.6157
CONR	CP	ENSMUSG00000022200.7	Golph3	CP	1.08999	1.7687e-08	2.45751e-07	7.75235	6.60951
CONR	CP	ENSMUSG00000032115.14	Hyou1	CP	1.54025	1.77201e-08	2.46033e-07	7.75153	6.60901
CONR	CP	ENSMUSG00000037649.9	H2-DMa	CP	2.41979	1.77418e-08	2.46155e-07	7.751	6.60879
CONR	CP	ENSMUSG00000049624.14	Slc17a5	CP	1.42682	1.79327e-08	2.48623e-07	7.74635	6.60446
CONR	CP	ENSMUSG00000058571.10	Gpc6	CP	1.81071	1.80989e-08	2.50745e-07	7.74235	6.60077
CONR	CP	ENSMUSG00000034675.17	Dbn1	CP	1.55935	1.81521e-08	2.51299e-07	7.74107	6.59981
CONR	CP	ENSMUSG00000032079.12	Apoa5	CONR	3.03573	1.82974e-08	2.53127e-07	7.73761	6.59666
CONR	CP	ENSMUSG00000022895.14	Ets2	CP	1.05227	1.84786e-08	2.55265e-07	7.73333	6.59301
CONR	CP	ENSMUSG00000024726.9	Carnmt1	CP	1.3555	1.88868e-08	2.60714e-07	7.72384	6.58384
CONR	CP	ENSMUSG00000026924.17	Sec16a	CP	1.1942	1.94858e-08	2.68595e-07	7.71028	6.5709
CONR	CP	ENSMUSG00000020519.5	Sap30l	CP	1.05431	1.95122e-08	2.68764e-07	7.70969	6.57063
CONR	CP	ENSMUSG00000034427.17	Myo15b	CP	1.85466	1.95843e-08	2.69563e-07	7.70809	6.56934
CONR	CP	ENSMUSG00000023495.13	Pcbp4	CP	1.19233	1.995e-08	2.74399e-07	7.70006	6.56162
CONR	CP	ENSMUSG00000039126.9	Prune2	CP	2.05711	2.00619e-08	2.7574e-07	7.69763	6.5595
CONR	CP	ENSMUSG00000013846.9	St3gal1	CP	1.31577	2.02712e-08	2.78415e-07	7.69312	6.55531
CONR	CP	ENSMUSG00000037465.9	Klf10	CP	1.43974	2.02862e-08	2.78421e-07	7.6928	6.5553
CONR	CP	ENSMUSG00000053886.4	Sh2d4a	CP	1.51794	2.03081e-08	2.78522e-07	7.69233	6.55514
CONR	CP	ENSMUSG00000047187.9	Rab2a	CP	1.09662	2.05208e-08	2.81237e-07	7.68781	6.55093
CONR	CP	ENSMUSG00000030256.11	Bhlhe41	CP	1.98327	2.05929e-08	2.82023e-07	7.68628	6.54972
CONR	CP	ENSMUSG00000032773.9	Chrm1	CONR	2.5021	2.06095e-08	2.82048e-07	7.68593	6.54968
CONR	CP	ENSMUSG00000025969.15	Nrp2	CP	1.72666	2.09868e-08	2.87005e-07	7.67805	6.54211
CONR	CP	ENSMUSG00000041012.4	Cmtm8	CP	1.4247	2.11117e-08	2.88365e-07	7.67548	6.54006
CONR	CP	ENSMUSG00000070436.12	Serpinh1	CP	1.33303	2.11165e-08	2.88365e-07	7.67538	6.54006
CONR	CP	ENSMUSG00000073599.9	Ecscr	CP	2.10955	2.13877e-08	2.91737e-07	7.66984	6.53501
CONR	CP	ENSMUSG00000066361.3	Serpina3c	CP	2.66676	2.1394e-08	2.91737e-07	7.66971	6.53501
CONR	CP	ENSMUSG00000034456.15	Uroc1	CONR	3.77805	2.14859e-08	2.92781e-07	7.66785	6.53346
CONR	CP	ENSMUSG00000050989.9	Selenon	CP	1.3707	2.15197e-08	2.93033e-07	7.66716	6.53308
CONR	CP	ENSMUSG00000026970.16	Rbms1	CP	1.04796	2.18213e-08	2.96928e-07	7.66112	6.52735
CONR	CP	ENSMUSG00000022793.16	B4galt4	CP	1.58728	2.19596e-08	2.98597e-07	7.65838	6.52491
CONR	CP	ENSMUSG00000039960.5	Rhou	CP	1.44941	2.20525e-08	2.99648e-07	7.65654	6.52339
CONR	CP	ENSMUSG00000020253.15	Ppm1m	CP	1.71143	2.21841e-08	3.01221e-07	7.65396	6.52111
CONR	CP	ENSMUSG00000034245.10	Hdac11	CP	1.63634	2.24218e-08	3.04232e-07	7.64933	6.5168
CONR	CP	ENSMUSG00000079144.7	A130010J15Rik	CP	1.29394	2.25106e-08	3.0522e-07	7.64761	6.51539
CONR	CP	ENSMUSG00000069792.5	Wfdc17	CP	2.68829	2.30682e-08	3.12559e-07	7.63699	6.50507
CONR	CP	ENSMUSG00000002808.7	Epdr1	CP	1.82969	2.31697e-08	3.13711e-07	7.63508	6.50347
CONR	CP	ENSMUSG00000036845.12	Lin37	CP	1.16025	2.32732e-08	3.14889e-07	7.63314	6.50184
CONR	CP	ENSMUSG00000097789.2	Gm2115	CP	4.54806	2.33901e-08	3.16148e-07	7.63097	6.50011
CONR	CP	ENSMUSG00000030107.10	Usp18	CP	2.53905	2.35062e-08	3.17367e-07	7.62882	6.49844
CONR	CP	ENSMUSG00000024487.4	Yipf5	CP	1.24726	2.37874e-08	3.20936e-07	7.62365	6.49358
CONR	CP	ENSMUSG00000023827.8	Agpat4	CP	1.57055	2.3805e-08	3.20947e-07	7.62333	6.49357
CONR	CP	ENSMUSG00000030036.8	Mogs	CP	1.09071	2.44616e-08	3.29567e-07	7.61151	6.48206
CONR	CP	ENSMUSG00000010048.10	Ifrd2	CP	1.29642	2.45102e-08	3.29988e-07	7.61065	6.4815
CONR	CP	ENSMUSG00000025465.13	Echs1	CP	1.12552	2.48861e-08	3.34616e-07	7.60404	6.47545
CONR	CP	ENSMUSG00000026398.14	Nr5a2	CP	1.59485	2.48889e-08	3.34616e-07	7.60399	6.47545
CONR	CP	ENSMUSG00000028214.13	Gem	CP	2.22566	2.57579e-08	3.46055e-07	7.58909	6.46086
CONR	CP	ENSMUSG00000029868.13	Trpv6	CP	1.8568	2.60349e-08	3.49531e-07	7.58444	6.45651
CONR	CP	ENSMUSG00000021795.9	Sftpd	CP	3.05801	2.62533e-08	3.52215e-07	7.58082	6.45319
CONR	CP	ENSMUSG00000024397.14	Aif1	CP	2.55635	2.62741e-08	3.52247e-07	7.58047	6.45315
CONR	CP	ENSMUSG00000040127.13	Sdr9c7	CONR	2.67959	2.62935e-08	3.52258e-07	7.58015	6.45314
CONR	CP	ENSMUSG00000031824.15	6430548M08Rik	CP	1.41297	2.63873e-08	3.53268e-07	7.5786	6.4519
CONR	CP	ENSMUSG00000032583.7	Mon1a	CP	1.18877	2.64892e-08	3.54365e-07	7.57693	6.45055
CONR	CP	ENSMUSG00000049690.15	Nckap5	CP	1.61913	2.65063e-08	3.54365e-07	7.57665	6.45055
CONR	CP	ENSMUSG00000017969.13	Ptgis	CP	2.16185	2.67169e-08	3.5693e-07	7.57321	6.44742
CONR	CP	ENSMUSG00000022840.8	Adcy5	CP	1.97014	2.69605e-08	3.59933e-07	7.56927	6.44378
CONR	CP	ENSMUSG00000042439.12	Zfp532	CP	1.71964	2.70417e-08	3.60764e-07	7.56797	6.44278
CONR	CP	ENSMUSG00000025967.16	Eef1b2	CP	1.15493	2.71009e-08	3.61301e-07	7.56702	6.44213
CONR	CP	ENSMUSG00000028047.11	Thbs3	CP	1.81968	2.75399e-08	3.66898e-07	7.56004	6.43545
CONR	CP	ENSMUSG00000061815.11	Rufy4	CP	2.08629	2.77774e-08	3.69803e-07	7.55631	6.43203
CONR	CP	ENSMUSG00000060180.12	Myh13	CONR	4.07663	2.7809e-08	3.69967e-07	7.55581	6.43184
CONR	CP	ENSMUSG00000026201.12	Stk16	CP	1.08336	2.78639e-08	3.70439e-07	7.55496	6.43128
CONR	CP	ENSMUSG00000051041.7	Olfml1	CP	1.6811	2.80136e-08	3.72169e-07	7.55263	6.42926
CONR	CP	ENSMUSG00000055148.7	Klf2	CP	2.04398	2.80402e-08	3.72263e-07	7.55222	6.42915
CONR	CP	ENSMUSG00000005611.15	Mrvi1	CP	2.3474	2.84759e-08	3.77785e-07	7.54552	6.42276
CONR	CP	ENSMUSG00000040548.16	Tex2	CP	1.24172	2.86784e-08	3.80208e-07	7.54244	6.41998
CONR	CP	ENSMUSG00000021624.9	Cd180	CP	2.38699	2.9316e-08	3.88132e-07	7.5329	6.41102
CONR	CP	ENSMUSG00000058248.12	Kcnh1	CP	2.01402	2.93167e-08	3.88132e-07	7.53288	6.41102
CONR	CP	ENSMUSG00000036882.7	Arhgap33	CP	4.18828	2.95798e-08	3.91342e-07	7.52901	6.40744
CONR	CP	ENSMUSG00000078794.4	Dact3	CP	2.22143	3.00563e-08	3.97372e-07	7.52206	6.4008
CONR	CP	ENSMUSG00000031833.10	Mast3	CP	1.01599	3.00883e-08	3.9752e-07	7.5216	6.40064
CONR	CP	ENSMUSG00000009927.9	Rps25	CP	1.19931	3.01375e-08	3.97895e-07	7.52089	6.40023
CONR	CP	ENSMUSG00000044279.15	Crb3	CP	1.44827	3.10051e-08	4.08501e-07	7.50857	6.38881
CONR	CP	ENSMUSG00000030657.11	Xylt1	CP	1.57426	3.14079e-08	4.13524e-07	7.50296	6.3835
CONR	CP	ENSMUSG00000027082.15	Tfpi	CP	1.57698	3.15885e-08	4.15615e-07	7.50047	6.38131
CONR	CP	ENSMUSG00000039682.12	Lap3	CP	1.05423	3.16591e-08	4.16256e-07	7.4995	6.38064
CONR	CP	ENSMUSG00000025512.15	Chid1	CP	1.36834	3.1851e-08	4.18491e-07	7.49688	6.37831
CONR	CP	ENSMUSG00000060407.6	Cyp2a12	CONR	2.94924	3.22027e-08	4.22821e-07	7.49211	6.37384
CONR	CP	ENSMUSG00000057841.5	Rpl32	CP	1.26741	3.2532e-08	4.26851e-07	7.48769	6.36972
CONR	CP	ENSMUSG00000073988.13	Ttpa	CP	1.96724	3.2574e-08	4.27109e-07	7.48713	6.36946
CONR	CP	ENSMUSG00000036067.12	Slc2a6	CP	3.4968	3.27013e-08	4.28484e-07	7.48543	6.36807
CONR	CP	ENSMUSG00000034786.17	Gpsm3	CP	2.35097	3.28087e-08	4.29596e-07	7.48401	6.36694
CONR	CP	ENSMUSG00000029404.15	Arl6ip4	CP	1.18107	3.29641e-08	4.31335e-07	7.48196	6.36519
CONR	CP	ENSMUSG00000028849.17	Map7d1	CP	1.04894	3.34479e-08	4.37366e-07	7.47563	6.35916
CONR	CP	ENSMUSG00000038884.14	A230050P20Rik	CP	2.1728	3.39984e-08	4.4426e-07	7.46854	6.35236
CONR	CP	ENSMUSG00000028843.8	Sh3bgrl3	CP	1.65261	3.43926e-08	4.49103e-07	7.46353	6.34765
CONR	CP	ENSMUSG00000030559.8	Rab38	CP	4.29941	3.45995e-08	4.51496e-07	7.46093	6.34535
CONR	CP	ENSMUSG00000038260.10	Trpm4	CP	1.29404	3.47099e-08	4.52627e-07	7.45955	6.34426
CONR	CP	ENSMUSG00000096210.1	H1f0	CP	1.33183	3.49575e-08	4.55545e-07	7.45646	6.34147
CONR	CP	ENSMUSG00000056602.11	Fry	CP	1.19552	3.51433e-08	4.57654e-07	7.45416	6.33946
CONR	CP	ENSMUSG00000032666.16	1700025G04Rik	CP	1.45826	3.52004e-08	4.58085e-07	7.45345	6.33905
CONR	CP	ENSMUSG00000027889.17	Ampd2	CP	1.11671	3.52295e-08	4.58152e-07	7.45309	6.33899
CONR	CP	ENSMUSG00000027099.9	Mtx2	CP	1.30061	3.57231e-08	4.63939e-07	7.44705	6.33354
CONR	CP	ENSMUSG00000037731.5	Themis2	CP	2.21032	3.63024e-08	4.71142e-07	7.44006	6.32685
CONR	CP	ENSMUSG00000022871.12	Fetub	CP	2.6995	3.67456e-08	4.76569e-07	7.43479	6.32187
CONR	CP	ENSMUSG00000025986.6	Slc39a10	CP	1.50445	3.68083e-08	4.77059e-07	7.43405	6.32143
CONR	CP	ENSMUSG00000045672.15	Col27a1	CP	1.46254	3.69429e-08	4.78478e-07	7.43247	6.32014
CONR	CP	ENSMUSG00000029776.11	Hibadh	CP	1.17643	3.72589e-08	4.82244e-07	7.42877	6.31673
CONR	CP	ENSMUSG00000044583.13	Tlr7	CP	2.52846	3.73797e-08	4.8348e-07	7.42736	6.31562
CONR	CP	ENSMUSG00000031967.15	Afg3l1	CP	1.08743	3.74203e-08	4.83677e-07	7.42689	6.31544
CONR	CP	ENSMUSG00000072235.5	Tuba1a	CP	1.28694	3.75625e-08	4.85186e-07	7.42525	6.31409
CONR	CP	ENSMUSG00000021877.11	Arf4	CP	1.03603	3.77897e-08	4.87791e-07	7.42263	6.31177
CONR	CP	ENSMUSG00000039883.5	Lrrc17	CP	2.58255	3.79085e-08	4.88994e-07	7.42126	6.3107
CONR	CP	ENSMUSG00000043943.14	Naalad2	CP	1.5679	3.86283e-08	4.97942e-07	7.41309	6.30282
CONR	CP	ENSMUSG00000063659.11	Zbtb18	CP	1.29955	3.88732e-08	5.00761e-07	7.41035	6.30037
CONR	CP	ENSMUSG00000041740.16	Rnf10	CP	1.04582	3.90599e-08	5.02827e-07	7.40827	6.29858
CONR	CP	ENSMUSG00000070284.10	Gmppb	CP	1.42224	3.92044e-08	5.04347e-07	7.40667	6.29727
CONR	CP	ENSMUSG00000044350.14	Lacc1	CP	2.22529	3.93621e-08	5.06035e-07	7.40492	6.29582
CONR	CP	ENSMUSG00000016319.3	Slc25a5	CP	1.05647	3.95543e-08	5.08163e-07	7.40281	6.294
CONR	CP	ENSMUSG00000028597.11	Gpx7	CP	2.08054	4.0359e-08	5.18153e-07	7.39406	6.28554
CONR	CP	ENSMUSG00000074656.12	Eif2s2	CP	1.09772	4.04755e-08	5.19299e-07	7.39281	6.28458
CONR	CP	ENSMUSG00000032527.13	Pccb	CP	1.27385	4.07612e-08	5.22613e-07	7.38975	6.28182
CONR	CP	ENSMUSG00000040033.16	Stat2	CP	1.22351	4.12366e-08	5.28355e-07	7.38472	6.27707
CONR	CP	ENSMUSG00000027562.12	Car2	CP	2.48028	4.18159e-08	5.35417e-07	7.37866	6.27131
CONR	CP	ENSMUSG00000026443.3	Lrrn2	CP	2.65387	4.1966e-08	5.36979e-07	7.3771	6.27004
CONR	CP	ENSMUSG00000015222.17	Map2	CP	1.85196	4.2154e-08	5.39024e-07	7.37516	6.26839
CONR	CP	ENSMUSG00000048758.14	Rpl29	CP	1.16362	4.26663e-08	5.45209e-07	7.36992	6.26344
CONR	CP	ENSMUSG00000009687.14	Fxyd5	CP	2.21219	4.27253e-08	5.45598e-07	7.36931	6.26313
CONR	CP	ENSMUSG00000001366.14	Fbxo9	CP	1.17789	4.28712e-08	5.46953e-07	7.36783	6.26205
CONR	CP	ENSMUSG00000037892.13	Pcdh18	CP	2.15284	4.28887e-08	5.46953e-07	7.36766	6.26205
CONR	CP	ENSMUSG00000032562.13	Gnai2	CP	1.26151	4.39144e-08	5.59659e-07	7.35739	6.25208
CONR	CP	ENSMUSG00000066861.14	Oas1g	CP	4.05884	4.4085e-08	5.61458e-07	7.35571	6.25068
CONR	CP	ENSMUSG00000031158.11	Timm17b	CP	1.03377	4.41623e-08	5.62069e-07	7.35495	6.25021
CONR	CP	ENSMUSG00000081406.4	Rps6-ps4	CP	1.79467	4.42543e-08	5.62864e-07	7.35404	6.2496
CONR	CP	ENSMUSG00000020766.4	Galk1	CP	1.22823	4.43468e-08	5.63665e-07	7.35314	6.24898
CONR	CP	ENSMUSG00000022150.16	Dab2	CP	1.62166	4.50474e-08	5.72189e-07	7.34633	6.24246
CONR	CP	ENSMUSG00000006442.10	Srm	CP	1.33412	4.56516e-08	5.79478e-07	7.34054	6.23696
CONR	CP	ENSMUSG00000063160.12	Numbl	CP	1.96471	4.57238e-08	5.80009e-07	7.33986	6.23657
CONR	CP	ENSMUSG00000037600.16	Kdf1	CP	1.88145	4.59969e-08	5.83086e-07	7.33727	6.23427
CONR	CP	ENSMUSG00000078570.10	1110065P20Rik	CP	1.26949	4.66877e-08	5.9145e-07	7.3308	6.22808
CONR	CP	ENSMUSG00000044258.9	Ctla2a	CP	2.04941	4.727e-08	5.9843e-07	7.32541	6.22299
CONR	CP	ENSMUSG00000027875.12	Hmgcs2	CP	1.54133	4.7494e-08	6.00867e-07	7.32336	6.22122
CONR	CP	ENSMUSG00000019997.11	Ccn2	CP	2.02425	4.76421e-08	6.02341e-07	7.32201	6.22016
CONR	CP	ENSMUSG00000034648.9	Lrrn1	CP	2.10878	4.77212e-08	6.02942e-07	7.32129	6.21972
CONR	CP	ENSMUSG00000029388.14	Eif2b1	CP	1.24093	4.84311e-08	6.10914e-07	7.31488	6.21402
CONR	CP	ENSMUSG00000031634.13	Ufsp2	CP	1.24281	4.84346e-08	6.10914e-07	7.31484	6.21402
CONR	CP	ENSMUSG00000033544.6	Angptl1	CP	1.90142	4.84481e-08	6.10914e-07	7.31472	6.21402
CONR	CP	ENSMUSG00000042485.6	Mustn1	CP	2.35726	4.89084e-08	6.1631e-07	7.31062	6.2102
CONR	CP	ENSMUSG00000032513.8	Gorasp1	CP	1.03207	4.93098e-08	6.20958e-07	7.30707	6.20694
CONR	CP	ENSMUSG00000047454.12	Gphn	CP	1.02792	4.94297e-08	6.22058e-07	7.30601	6.20617
CONR	CP	ENSMUSG00000095285.2	Ighv5-9	CP	4.60736	5.04581e-08	6.34583e-07	7.29707	6.19751
CONR	CP	ENSMUSG00000024215.13	Spdef	CP	2.12027	5.11639e-08	6.43035e-07	7.29104	6.19177
CONR	CP	ENSMUSG00000022742.5	Cpox	CP	1.35535	5.13207e-08	6.44581e-07	7.28971	6.19072
CONR	CP	ENSMUSG00000032177.17	Pde4a	CP	1.49362	5.15301e-08	6.46786e-07	7.28794	6.18924
CONR	CP	ENSMUSG00000021492.15	F12	CONR	3.16801	5.16856e-08	6.48311e-07	7.28663	6.18822
CONR	CP	ENSMUSG00000027774.16	Gfm1	CP	1.10894	5.24533e-08	6.57509e-07	7.28023	6.1821
CONR	CP	ENSMUSG00000048120.16	Entpd1	CP	1.11756	5.2634e-08	6.59341e-07	7.27873	6.18089
CONR	CP	ENSMUSG00000022474.14	Pmm1	CP	1.3948	5.42891e-08	6.79213e-07	7.26529	6.16799
CONR	CP	ENSMUSG00000061414.8	Cracr2a	CP	1.55019	5.42915e-08	6.79213e-07	7.26527	6.16799
CONR	CP	ENSMUSG00000040957.14	Cables1	CP	1.22905	5.44979e-08	6.81128e-07	7.26362	6.16677
CONR	CP	ENSMUSG00000023571.4	C1qtnf12	CP	1.3338	5.4516e-08	6.81128e-07	7.26348	6.16677
CONR	CP	ENSMUSG00000024181.8	Mrpl28	CP	1.23813	5.49785e-08	6.86009e-07	7.25981	6.16367
CONR	CP	ENSMUSG00000027194.16	Ttc17	CP	1.06659	5.50209e-08	6.8609e-07	7.25947	6.16362
CONR	CP	ENSMUSG00000025702.15	March8	CP	1.15612	5.58305e-08	6.95277e-07	7.25313	6.15784
CONR	CP	ENSMUSG00000033860.13	Fgg	CONR	2.62164	5.66974e-08	7.05613e-07	7.24644	6.15143
CONR	CP	ENSMUSG00000047181.12	Samd14	CP	1.5662	5.67864e-08	7.0626e-07	7.24576	6.15104
CONR	CP	ENSMUSG00000047180.8	Neurl3	CP	2.12912	5.70145e-08	7.08636e-07	7.24401	6.14958
CONR	CP	ENSMUSG00000043832.13	Clec4a3	CP	2.71199	5.71012e-08	7.09252e-07	7.24335	6.1492
CONR	CP	ENSMUSG00000019326.14	Aoc3	CP	1.70943	5.71442e-08	7.09324e-07	7.24303	6.14916
CONR	CP	ENSMUSG00000002908.17	Kcnn1	CP	1.87559	5.76289e-08	7.14876e-07	7.23936	6.14577
CONR	CP	ENSMUSG00000046805.9	Mpeg1	CP	2.42724	5.80807e-08	7.20012e-07	7.23597	6.14266
CONR	CP	ENSMUSG00000018411.17	Mapt	CP	1.68131	5.82332e-08	7.21104e-07	7.23483	6.142
CONR	CP	ENSMUSG00000030748.9	Il4ra	CP	2.25235	5.82444e-08	7.21104e-07	7.23475	6.142
CONR	CP	ENSMUSG00000022651.5	Retnlg	CP	3.13608	5.8768e-08	7.26664e-07	7.23086	6.13867
CONR	CP	ENSMUSG00000021567.15	Nkd2	CP	2.75911	5.87695e-08	7.26664e-07	7.23085	6.13867
CONR	CP	ENSMUSG00000006024.13	Napa	CP	1.08529	5.90207e-08	7.29297e-07	7.229	6.1371
CONR	CP	ENSMUSG00000075486.9	Commd6	CP	1.02231	5.92757e-08	7.31974e-07	7.22712	6.1355
CONR	CP	ENSMUSG00000003199.16	Mpnd	CP	1.17917	5.93245e-08	7.32103e-07	7.22677	6.13543
CONR	CP	ENSMUSG00000021210.16	Akr1c6	CONR	3.25756	5.94355e-08	7.32898e-07	7.22595	6.13496
CONR	CP	ENSMUSG00000034311.3	Kif4	CP	3.37908	5.94656e-08	7.32898e-07	7.22573	6.13496
CONR	CP	ENSMUSG00000032081.10	Apoc3	CONR	2.63248	5.97592e-08	7.35566e-07	7.2236	6.13338
CONR	CP	ENSMUSG00000030737.17	Slco2b1	CP	1.89534	5.99516e-08	7.37459e-07	7.2222	6.13226
CONR	CP	ENSMUSG00000037816.10	Fbxw17	CP	2.23374	6.04047e-08	7.42554e-07	7.21893	6.12927
CONR	CP	ENSMUSG00000032661.9	Oas3	CP	2.5292	6.08083e-08	7.47034e-07	7.21604	6.12666
CONR	CP	ENSMUSG00000026360.9	Rgs2	CP	2.15533	6.1072e-08	7.49792e-07	7.21416	6.12506
CONR	CP	ENSMUSG00000051242.1	Pcdhb9	CP	3.86691	6.14642e-08	7.54121e-07	7.21138	6.12256
CONR	CP	ENSMUSG00000029802.13	Abcg2	CP	1.90133	6.17037e-08	7.56088e-07	7.20969	6.12143
CONR	CP	ENSMUSG00000021770.10	Samd8	CP	1.11787	6.3284e-08	7.74955e-07	7.19871	6.11072
CONR	CP	ENSMUSG00000035441.14	Myo1d	CP	1.5323	6.34815e-08	7.76875e-07	7.19735	6.10965
CONR	CP	ENSMUSG00000073910.10	Mob3b	CP	1.33532	6.35549e-08	7.77275e-07	7.19685	6.10943
CONR	CP	ENSMUSG00000002847.6	Pla1a	CP	2.24731	6.38253e-08	7.80082e-07	7.19501	6.10786
CONR	CP	ENSMUSG00000032915.6	Adgre4	CP	2.33389	6.40323e-08	7.82111e-07	7.1936	6.10673
CONR	CP	ENSMUSG00000038967.13	Pdk2	CP	1.18189	6.48767e-08	7.91919e-07	7.18791	6.10132
CONR	CP	ENSMUSG00000001403.13	Ube2c	CP	1.89189	6.49666e-08	7.92509e-07	7.18731	6.101
CONR	CP	ENSMUSG00000097310.1	A930038B10Rik	CONR	2.75795	6.8248e-08	8.31475e-07	7.16591	6.08015
CONR	CP	ENSMUSG00000043079.17	Synpo	CP	1.22867	6.83511e-08	8.32201e-07	7.16525	6.07977
CONR	CP	ENSMUSG00000022098.9	Bmp1	CP	1.3622	6.85812e-08	8.3447e-07	7.1638	6.07859
CONR	CP	ENSMUSG00000026389.16	Steap3	CP	1.5317	6.94525e-08	8.44533e-07	7.15831	6.07338
CONR	CP	ENSMUSG00000002820.6	Atg4d	CP	1.29618	6.99575e-08	8.49592e-07	7.15517	6.07079
CONR	CP	ENSMUSG00000059479.7	B3gnt8	CP	1.80155	7.04892e-08	8.55505e-07	7.15188	6.06778
CONR	CP	ENSMUSG00000031765.8	Mt1	CP	1.81197	7.07321e-08	8.57908e-07	7.15038	6.06656
CONR	CP	ENSMUSG00000026383.14	Epb41l5	CP	1.58756	7.16801e-08	8.68854e-07	7.1446	6.06105
CONR	CP	ENSMUSG00000027955.16	Gask1b	CP	1.42116	7.23042e-08	8.75863e-07	7.14084	6.05756
CONR	CP	ENSMUSG00000023175.15	Bsg	CP	1.25061	7.26073e-08	8.78976e-07	7.13902	6.05602
CONR	CP	ENSMUSG00000017897.18	Eya2	CP	1.7884	7.26996e-08	8.79537e-07	7.13847	6.05575
CONR	CP	ENSMUSG00000030515.9	Tarsl2	CP	1.45093	7.28644e-08	8.80971e-07	7.13748	6.05504
CONR	CP	ENSMUSG00000030826.19	Bcat2	CP	1.35604	7.38577e-08	8.91884e-07	7.1316	6.04969
CONR	CP	ENSMUSG00000020496.9	Rnf187	CP	1.04983	7.38603e-08	8.91884e-07	7.13159	6.04969
CONR	CP	ENSMUSG00000039497.8	Dse	CP	1.67322	7.39629e-08	8.92557e-07	7.13099	6.04936
CONR	CP	ENSMUSG00000022253.14	Nadk2	CP	1.24623	7.49165e-08	9.03494e-07	7.12542	6.04407
CONR	CP	ENSMUSG00000028369.15	Svep1	CP	1.46392	7.57285e-08	9.1271e-07	7.12074	6.03967
CONR	CP	ENSMUSG00000029311.16	Hsd17b11	CP	1.02749	7.57959e-08	9.12947e-07	7.12035	6.03955
CONR	CP	ENSMUSG00000021486.6	Prelid1	CP	1.02199	7.62797e-08	9.18194e-07	7.11759	6.03707
CONR	CP	ENSMUSG00000015342.6	Xk	CP	1.4409	7.69084e-08	9.25179e-07	7.11403	6.03377
CONR	CP	ENSMUSG00000027715.9	Ccna2	CP	2.33997	7.72695e-08	9.28937e-07	7.11199	6.03201
CONR	CP	ENSMUSG00000001930.17	Vwf	CP	1.06486	7.73744e-08	9.29613e-07	7.1114	6.0317
CONR	CP	ENSMUSG00000000374.8	Trappc10	CP	1.06105	7.74837e-08	9.30341e-07	7.11079	6.03136
CONR	CP	ENSMUSG00000072620.3	Slfn2	CP	2.58345	7.89512e-08	9.47364e-07	7.10264	6.02348
CONR	CP	ENSMUSG00000037458.14	Azin1	CP	1.15604	7.91158e-08	9.48743e-07	7.10174	6.02285
CONR	CP	ENSMUSG00000015970.18	Chdh	CP	1.59489	7.94978e-08	9.52726e-07	7.09965	6.02103
CONR	CP	ENSMUSG00000022952.16	Runx1	CP	1.94443	8.06714e-08	9.66184e-07	7.09328	6.01494
CONR	CP	ENSMUSG00000062981.5	Mrpl42	CP	1.1766	8.07526e-08	9.66551e-07	7.09284	6.01478
CONR	CP	ENSMUSG00000022665.14	Ccdc80	CP	2.06601	8.09915e-08	9.68802e-07	7.09156	6.01377
CONR	CP	ENSMUSG00000034220.7	Gpc1	CP	1.0794	8.14725e-08	9.73946e-07	7.08899	6.01147
CONR	CP	ENSMUSG00000022912.8	Pros1	CP	1.62161	8.16482e-08	9.75436e-07	7.08805	6.0108
CONR	CP	ENSMUSG00000031671.11	Setd6	CP	1.38281	8.1792e-08	9.76542e-07	7.08729	6.01031
CONR	CP	ENSMUSG00000000753.15	Serpinf1	CP	1.56572	8.2121e-08	9.7955e-07	7.08555	6.00897
CONR	CP	ENSMUSG00000064339.1	mt-Rnr2	CP	1.30882	8.21465e-08	9.7955e-07	7.08541	6.00897
CONR	CP	ENSMUSG00000039865.8	Slc44a3	CP	1.60598	8.22255e-08	9.79879e-07	7.08499	6.00883
CONR	CP	ENSMUSG00000050288.6	Fzd2	CP	2.0175	8.33672e-08	9.92247e-07	7.079	6.00338
CONR	CP	ENSMUSG00000044811.13	Cd300c2	CP	2.56717	8.36382e-08	9.94851e-07	7.0776	6.00224
CONR	CP	ENSMUSG00000026786.14	Apbb1ip	CP	2.33718	8.40881e-08	9.98958e-07	7.07527	6.00045
CONR	CP	ENSMUSG00000062995.12	Ica1	CP	1.334	8.49502e-08	1.00793e-06	7.07084	5.99657
CONR	CP	ENSMUSG00000054203.7	Ifi205	CP	2.30222	8.49767e-08	1.00793e-06	7.0707	5.99657
CONR	CP	ENSMUSG00000047878.12	A4galt	CP	2.08935	8.50013e-08	1.00793e-06	7.07057	5.99657
CONR	CP	ENSMUSG00000018217.12	Pmp22	CP	1.60994	8.59777e-08	1.01887e-06	7.06561	5.99188
CONR	CP	ENSMUSG00000020715.9	Ern1	CP	1.35058	8.69615e-08	1.02989e-06	7.06067	5.98721
CONR	CP	ENSMUSG00000076695.7	Ighv1-18	CP	3.5551	8.76719e-08	1.03766e-06	7.05714	5.98395
CONR	CP	ENSMUSG00000063268.12	Parp10	CP	1.55155	8.81342e-08	1.04248e-06	7.05486	5.98193
CONR	CP	ENSMUSG00000055235.11	Wdr86	CP	2.90582	8.90291e-08	1.05242e-06	7.05047	5.97781
CONR	CP	ENSMUSG00000067279.2	Ppp1r3c	CP	2.33837	8.94432e-08	1.05666e-06	7.04845	5.97607
CONR	CP	ENSMUSG00000041798.15	Gck	CP	2.11979	9.05586e-08	1.06917e-06	7.04307	5.97095
CONR	CP	ENSMUSG00000035944.17	Ttc38	CP	1.02779	9.3228e-08	1.10001e-06	7.03045	5.9586
CONR	CP	ENSMUSG00000031826.20	Usp10	CP	1.15448	9.34194e-08	1.10105e-06	7.02956	5.95819
CONR	CP	ENSMUSG00000040850.17	Psme4	CP	1.11225	9.37416e-08	1.10402e-06	7.02807	5.95702
CONR	CP	ENSMUSG00000032718.4	Mansc1	CP	1.54594	9.51907e-08	1.11971e-06	7.02141	5.9509
CONR	CP	ENSMUSG00000022323.11	Rida	CP	1.16192	9.67024e-08	1.13679e-06	7.01456	5.94432
CONR	CP	ENSMUSG00000017801.15	Mlx	CP	1.00383	9.68943e-08	1.13824e-06	7.0137	5.94377
CONR	CP	ENSMUSG00000021785.7	Ngly1	CP	1.0894	9.69448e-08	1.13824e-06	7.01348	5.94377
CONR	CP	ENSMUSG00000040229.11	Gpr34	CP	2.29726	9.74588e-08	1.14357e-06	7.01118	5.94174
CONR	CP	ENSMUSG00000042251.12	Pm20d1	CP	1.75848	9.92559e-08	1.16394e-06	7.00324	5.93407
CONR	CP	ENSMUSG00000020102.15	Slc16a7	CP	1.55523	9.95334e-08	1.16648e-06	7.00203	5.93312
CONR	CP	ENSMUSG00000023806.9	Rsph3b	CP	1.27484	9.98319e-08	1.16926e-06	7.00073	5.93209
CONR	CP	ENSMUSG00000027999.15	Pla2g12a	CP	1.48572	1.00164e-07	1.17242e-06	6.99929	5.93092
CONR	CP	ENSMUSG00000048126.16	Col6a3	CP	1.38187	1.00531e-07	1.176e-06	6.9977	5.92959
CONR	CP	ENSMUSG00000028495.14	Rps6	CP	1.11305	1.00688e-07	1.17711e-06	6.99702	5.92918
CONR	CP	ENSMUSG00000040711.7	Sh3pxd2b	CP	1.33724	1.01073e-07	1.1809e-06	6.99536	5.92779
CONR	CP	ENSMUSG00000040213.13	Kyat3	CP	1.46878	1.01411e-07	1.18412e-06	6.99391	5.9266
CONR	CP	ENSMUSG00000028553.12	Angptl3	CONR	2.87393	1.01663e-07	1.18634e-06	6.99284	5.92579
CONR	CP	ENSMUSG00000021069.17	Pygl	CP	1.78833	1.02173e-07	1.19156e-06	6.99067	5.92389
CONR	CP	ENSMUSG00000024897.8	Apba1	CP	1.26649	1.0378e-07	1.20956e-06	6.98389	5.91737
CONR	CP	ENSMUSG00000028999.15	Rint1	CP	1.15014	1.04357e-07	1.21554e-06	6.98148	5.91523
CONR	CP	ENSMUSG00000039787.13	Cercam	CP	1.77345	1.08434e-07	1.26073e-06	6.96483	5.89938
CONR	CP	ENSMUSG00000029727.7	Cyp3a13	CONR	3.10978	1.08985e-07	1.26636e-06	6.96263	5.89744
CONR	CP	ENSMUSG00000061232.15	H2-K1	CP	1.51928	1.09859e-07	1.27574e-06	6.95916	5.89424
CONR	CP	ENSMUSG00000028557.10	Rnf11	CP	1.20221	1.10062e-07	1.27732e-06	6.95836	5.8937
CONR	CP	ENSMUSG00000027447.6	Cst3	CP	1.17889	1.10964e-07	1.287e-06	6.95482	5.89042
CONR	CP	ENSMUSG00000062647.16	Rpl7a	CP	1.08818	1.11917e-07	1.29727e-06	6.9511	5.88697
CONR	CP	ENSMUSG00000069833.12	Ahnak	CP	1.53638	1.12072e-07	1.29829e-06	6.9505	5.88663
CONR	CP	ENSMUSG00000045392.8	Olfr1033	CP	2.05901	1.14904e-07	1.3298e-06	6.93967	5.87621
CONR	CP	ENSMUSG00000026123.11	Plekhb2	CP	1.03766	1.14932e-07	1.3298e-06	6.93956	5.87621
CONR	CP	ENSMUSG00000002831.13	Plin4	CP	2.06707	1.16256e-07	1.3443e-06	6.93458	5.8715
CONR	CP	ENSMUSG00000070942.8	Il1rl2	CP	2.01636	1.16874e-07	1.35063e-06	6.93228	5.86946
CONR	CP	ENSMUSG00000097730.3	Gm26588	CP	1.89793	1.17852e-07	1.36111e-06	6.92866	5.86611
CONR	CP	ENSMUSG00000034792.8	Gna15	CP	2.68085	1.18766e-07	1.37083e-06	6.92531	5.86302
CONR	CP	ENSMUSG00000025877.14	Hk3	CP	2.38935	1.19396e-07	1.37669e-06	6.92301	5.86116
CONR	CP	ENSMUSG00000090084.7	Srpx	CP	1.80458	1.19417e-07	1.37669e-06	6.92293	5.86116
CONR	CP	ENSMUSG00000028261.13	Ndufaf4	CP	1.11301	1.20166e-07	1.38448e-06	6.92022	5.85871
CONR	CP	ENSMUSG00000003235.12	Eif2b5	CP	1.06922	1.21972e-07	1.40444e-06	6.91374	5.8525
CONR	CP	ENSMUSG00000019194.15	Scn1b	CP	1.45705	1.22416e-07	1.40871e-06	6.91216	5.85118
CONR	CP	ENSMUSG00000003484.4	Cyp4f18	CP	2.335	1.22813e-07	1.41243e-06	6.91075	5.85003
CONR	CP	ENSMUSG00000044224.16	Dnajc21	CP	1.26839	1.22904e-07	1.41262e-06	6.91043	5.84997
CONR	CP	ENSMUSG00000048833.9	Slc39a9	CP	1.12062	1.2316e-07	1.41471e-06	6.90953	5.84933
CONR	CP	ENSMUSG00000015950.13	Ncf1	CP	2.49876	1.25662e-07	1.44171e-06	6.9008	5.84112
CONR	CP	ENSMUSG00000020848.7	Doc2b	CP	2.82478	1.26758e-07	1.45342e-06	6.89702	5.83761
CONR	CP	ENSMUSG00000018102.4	Hist1h2bc	CP	1.24062	1.27703e-07	1.4625e-06	6.8938	5.83491
CONR	CP	ENSMUSG00000110018.1	5430437J10Rik	CONR	2.30402	1.28124e-07	1.46643e-06	6.89237	5.83374
CONR	CP	ENSMUSG00000012443.3	Kif11	CP	1.8782	1.29007e-07	1.47566e-06	6.88939	5.83102
CONR	CP	ENSMUSG00000025058.4	5430427O19Rik	CP	2.95336	1.29963e-07	1.4857e-06	6.88618	5.82807
CONR	CP	ENSMUSG00000039959.13	Hip1	CP	1.15606	1.33091e-07	1.52041e-06	6.87585	5.81804
CONR	CP	ENSMUSG00000041734.15	Kirrel	CP	1.53779	1.33159e-07	1.52041e-06	6.87563	5.81804
CONR	CP	ENSMUSG00000003746.16	Man1a	CP	1.03814	1.33843e-07	1.52732e-06	6.8734	5.81607
CONR	CP	ENSMUSG00000038068.14	Rnf144b	CP	1.8577	1.34529e-07	1.53423e-06	6.87118	5.81411
CONR	CP	ENSMUSG00000040359.14	Ufl1	CP	1.26188	1.35459e-07	1.54391e-06	6.86819	5.81138
CONR	CP	ENSMUSG00000000386.14	Mx1	CP	2.76315	1.35821e-07	1.54711e-06	6.86703	5.81048
CONR	CP	ENSMUSG00000071014.10	Ndufb6	CP	1.17014	1.36866e-07	1.55809e-06	6.8637	5.80741
CONR	CP	ENSMUSG00000027822.16	Slc33a1	CP	1.41643	1.37941e-07	1.56938e-06	6.86031	5.80427
CONR	CP	ENSMUSG00000019891.15	Dcbld1	CP	1.44738	1.38876e-07	1.57909e-06	6.85737	5.80159
CONR	CP	ENSMUSG00000045005.9	Fzd5	CP	1.38228	1.39152e-07	1.58041e-06	6.85651	5.80123
CONR	CP	ENSMUSG00000024238.13	Zeb1	CP	1.69813	1.39159e-07	1.58041e-06	6.85649	5.80123
CONR	CP	ENSMUSG00000030255.13	Sspn	CP	1.89318	1.39375e-07	1.58193e-06	6.85581	5.80081
CONR	CP	ENSMUSG00000021493.15	Pdlim7	CP	2.01021	1.40362e-07	1.59219e-06	6.85275	5.79801
CONR	CP	ENSMUSG00000039529.8	Atp8b1	CP	1.60183	1.41302e-07	1.6019e-06	6.84985	5.79537
CONR	CP	ENSMUSG00000036938.17	Try5	CP	1.40923	1.41854e-07	1.60721e-06	6.84816	5.79393
CONR	CP	ENSMUSG00000023707.13	Ogfod2	CP	1.16594	1.45205e-07	1.64419e-06	6.83802	5.78405
CONR	CP	ENSMUSG00000025887.10	Casp12	CP	1.94289	1.48449e-07	1.67893e-06	6.82842	5.77497
CONR	CP	ENSMUSG00000026825.17	Dnm1	CP	1.86077	1.48874e-07	1.68274e-06	6.82718	5.77398
CONR	CP	ENSMUSG00000026202.13	Tuba4a	CP	1.56478	1.49459e-07	1.68836e-06	6.82548	5.77254
CONR	CP	ENSMUSG00000026839.16	Upp2	CP	1.65782	1.50941e-07	1.70308e-06	6.82119	5.76877
CONR	CP	ENSMUSG00000030805.14	Stx4a	CP	1.1917	1.52005e-07	1.71408e-06	6.81814	5.76597
CONR	CP	ENSMUSG00000074622.4	Mafb	CP	1.25094	1.53196e-07	1.72648e-06	6.81475	5.76284
CONR	CP	ENSMUSG00000096971.1	4930556M19Rik	CP	1.70792	1.53323e-07	1.7269e-06	6.81439	5.76273
CONR	CP	ENSMUSG00000038150.7	Ormdl3	CP	1.2181	1.54922e-07	1.74388e-06	6.80989	5.75848
CONR	CP	ENSMUSG00000074634.11	Tmem267	CP	2.20024	1.55144e-07	1.74535e-06	6.80927	5.75812
CONR	CP	ENSMUSG00000036469.16	March1	CP	2.33381	1.56695e-07	1.76176e-06	6.80495	5.75405
CONR	CP	ENSMUSG00000079197.10	Psme2	CP	1.41957	1.59139e-07	1.78819e-06	6.79822	5.74759
CONR	CP	ENSMUSG00000032051.9	Fdx1	CP	1.2661	1.61193e-07	1.80913e-06	6.79265	5.74253
CONR	CP	ENSMUSG00000017400.10	Stac2	CP	2.96125	1.61597e-07	1.81153e-06	6.79157	5.74195
CONR	CP	ENSMUSG00000020689.4	Itgb3	CP	1.78347	1.62082e-07	1.81591e-06	6.79026	5.74091
CONR	CP	ENSMUSG00000022354.3	Ndufb9	CP	1.24691	1.62736e-07	1.82216e-06	6.78852	5.73941
CONR	CP	ENSMUSG00000031490.6	Eif4ebp1	CP	1.40354	1.6527e-07	1.84946e-06	6.78181	5.73296
CONR	CP	ENSMUSG00000031790.8	Mmp15	CP	1.14267	1.66146e-07	1.85816e-06	6.77951	5.73092
CONR	CP	ENSMUSG00000035258.14	Abi3bp	CP	1.83259	1.6663e-07	1.86249e-06	6.77825	5.72991
CONR	CP	ENSMUSG00000052684.4	Jun	CP	1.13148	1.67286e-07	1.86873e-06	6.77654	5.72845
CONR	CP	ENSMUSG00000066232.4	Ipo7	CP	1.18299	1.69478e-07	1.891e-06	6.77089	5.72331
CONR	CP	ENSMUSG00000063089.4	Klk1b8	CP	1.80596	1.75384e-07	1.95349e-06	6.75601	5.70919
CONR	CP	ENSMUSG00000028980.14	H6pd	CP	1.20123	1.75386e-07	1.95349e-06	6.75601	5.70919
CONR	CP	ENSMUSG00000022956.10	Atp5o	CP	1.30239	1.77239e-07	1.97298e-06	6.75144	5.70488
CONR	CP	ENSMUSG00000019832.5	Rab32	CP	1.76892	1.77735e-07	1.97736e-06	6.75023	5.70391
CONR	CP	ENSMUSG00000034593.16	Myo5a	CP	1.90821	1.78618e-07	1.98602e-06	6.74808	5.70202
CONR	CP	ENSMUSG00000009633.3	G0s2	CP	1.74438	1.80403e-07	2.0047e-06	6.74376	5.69795
CONR	CP	ENSMUSG00000073555.1	Gm4951	CP	2.38277	1.81732e-07	2.01829e-06	6.74057	5.69502
CONR	CP	ENSMUSG00000038178.16	Slc43a2	CP	1.59198	1.82973e-07	2.02972e-06	6.73761	5.69256
CONR	CP	ENSMUSG00000047040.9	Prr15l	CP	1.65185	1.83417e-07	2.03346e-06	6.73656	5.69176
CONR	CP	ENSMUSG00000007989.6	Fzd3	CP	1.90913	1.85094e-07	2.05086e-06	6.73261	5.68806
CONR	CP	ENSMUSG00000021646.9	Mccc2	CP	1.10459	1.8786e-07	2.08027e-06	6.72617	5.68188
CONR	CP	ENSMUSG00000054814.14	Usp46	CP	1.3665	1.87967e-07	2.08027e-06	6.72592	5.68188
CONR	CP	ENSMUSG00000041431.16	Ccnb1	CP	1.98471	1.88189e-07	2.08152e-06	6.72541	5.68162
CONR	CP	ENSMUSG00000112803.1	Gm36543	CONR	2.34274	1.88667e-07	2.0856e-06	6.7243	5.68077
CONR	CP	ENSMUSG00000032336.17	Nptn	CP	1.02803	1.89948e-07	2.09855e-06	6.72137	5.67808
CONR	CP	ENSMUSG00000032602.6	Slc25a20	CP	1.35585	1.90477e-07	2.10318e-06	6.72016	5.67712
CONR	CP	ENSMUSG00000056648.5	Hoxb8	CP	4.36435	1.93769e-07	2.13519e-06	6.71272	5.67056
CONR	CP	ENSMUSG00000075010.4	AW112010	CP	2.41545	1.93775e-07	2.13519e-06	6.7127	5.67056
CONR	CP	ENSMUSG00000001755.12	Coasy	CP	1.11336	1.93823e-07	2.13519e-06	6.71259	5.67056
CONR	CP	ENSMUSG00000045658.16	Pid1	CP	1.56156	1.97124e-07	2.1703e-06	6.70526	5.66348
CONR	CP	ENSMUSG00000026399.12	Cd55	CP	1.98916	1.98223e-07	2.18114e-06	6.70285	5.66132
CONR	CP	ENSMUSG00000050069.3	Grem2	CP	2.41767	1.988e-07	2.18612e-06	6.70158	5.66033
CONR	CP	ENSMUSG00000026321.7	Tnfrsf11a	CP	1.97186	1.98905e-07	2.18612e-06	6.70136	5.66033
CONR	CP	ENSMUSG00000004462.6	Tbccd1	CP	1.39066	1.997e-07	2.1936e-06	6.69962	5.65884
CONR	CP	ENSMUSG00000041731.13	Pgm5	CP	2.78154	2.00807e-07	2.20283e-06	6.69722	5.65702
CONR	CP	ENSMUSG00000031897.9	Psmb10	CP	1.2557	2.00887e-07	2.20283e-06	6.69705	5.65702
CONR	CP	ENSMUSG00000029635.15	Cdk8	CP	1.08343	2.05748e-07	2.25485e-06	6.68666	5.64688
CONR	CP	ENSMUSG00000029777.10	Gars	CP	1.20339	2.05897e-07	2.25518e-06	6.68635	5.64682
CONR	CP	ENSMUSG00000066839.12	Ecsit	CP	1.12473	2.06135e-07	2.25649e-06	6.68585	5.64657
CONR	CP	ENSMUSG00000022822.15	Abcc5	CP	1.24491	2.08204e-07	2.27784e-06	6.68151	5.64248
CONR	CP	ENSMUSG00000020773.11	Trim47	CP	1.3239	2.09949e-07	2.295e-06	6.67789	5.63922
CONR	CP	ENSMUSG00000091345.9	Col6a5	CP	2.1622	2.10013e-07	2.295e-06	6.67775	5.63922
CONR	CP	ENSMUSG00000070867.4	Trabd2b	CP	1.9369	2.10522e-07	2.29924e-06	6.6767	5.63842
CONR	CP	ENSMUSG00000036249.16	Rbm43	CP	1.58511	2.11696e-07	2.31075e-06	6.67429	5.63625
CONR	CP	ENSMUSG00000031948.14	Kars	CP	1.07364	2.13146e-07	2.32524e-06	6.67132	5.63353
CONR	CP	ENSMUSG00000034947.13	Tmem106a	CP	1.93379	2.14058e-07	2.33386e-06	6.66947	5.63193
CONR	CP	ENSMUSG00000029417.9	Cxcl9	CP	2.55154	2.14267e-07	2.3348e-06	6.66905	5.63175
CONR	CP	ENSMUSG00000054408.9	Spcs3	CP	1.2141	2.14527e-07	2.3363e-06	6.66852	5.63147
CONR	CP	ENSMUSG00000049744.15	Arhgap15	CP	2.44792	2.15017e-07	2.34031e-06	6.66753	5.63073
CONR	CP	ENSMUSG00000049988.4	Lrrc25	CP	1.96953	2.16305e-07	2.35255e-06	6.66493	5.62846
CONR	CP	ENSMUSG00000006519.11	Cyba	CP	1.81325	2.16389e-07	2.35255e-06	6.66477	5.62846
CONR	CP	ENSMUSG00000049625.5	Tifab	CP	2.20599	2.19012e-07	2.37972e-06	6.65953	5.62347
CONR	CP	ENSMUSG00000019699.16	Akt3	CP	1.53048	2.2213e-07	2.41222e-06	6.65339	5.61758
CONR	CP	ENSMUSG00000024937.14	Ehbp1l1	CP	1.48218	2.22399e-07	2.41377e-06	6.65287	5.6173
CONR	CP	ENSMUSG00000026773.19	Pfkfb3	CP	2.12659	2.23233e-07	2.42023e-06	6.65124	5.61614
CONR	CP	ENSMUSG00000049295.16	Zfp219	CP	1.26731	2.23248e-07	2.42023e-06	6.65121	5.61614
CONR	CP	ENSMUSG00000034903.18	Cobll1	CP	1.33965	2.24247e-07	2.42968e-06	6.64927	5.61445
CONR	CP	ENSMUSG00000000805.18	Car4	CONR	2.43528	2.2549e-07	2.44176e-06	6.64687	5.6123
CONR	CP	ENSMUSG00000074227.12	Spint2	CP	1.19876	2.25891e-07	2.44472e-06	6.6461	5.61177
CONR	CP	ENSMUSG00000048096.7	Lmod1	CP	2.72527	2.27797e-07	2.46395e-06	6.64245	5.60837
CONR	CP	ENSMUSG00000016494.9	Cd34	CP	1.41611	2.28886e-07	2.47433e-06	6.64038	5.60654
CONR	CP	ENSMUSG00000019779.15	Frk	CP	1.70009	2.32687e-07	2.51399e-06	6.63323	5.59964
CONR	CP	ENSMUSG00000003526.11	Prodh	CP	1.24721	2.33863e-07	2.52443e-06	6.63104	5.59784
CONR	CP	ENSMUSG00000022040.7	Ephx2	CP	1.69365	2.33918e-07	2.52443e-06	6.63094	5.59784
CONR	CP	ENSMUSG00000061740.7	Cyp2d22	CP	1.34014	2.35404e-07	2.53876e-06	6.62819	5.59538
CONR	CP	ENSMUSG00000024660.8	Incenp	CP	1.64145	2.35511e-07	2.53876e-06	6.62799	5.59538
CONR	CP	ENSMUSG00000042712.10	Tceal9	CP	1.3056	2.35939e-07	2.54193e-06	6.6272	5.59484
CONR	CP	ENSMUSG00000053565.10	Eif3k	CP	1.08925	2.36087e-07	2.5421e-06	6.62693	5.59481
CONR	CP	ENSMUSG00000038147.13	Cd84	CP	2.12522	2.37463e-07	2.55547e-06	6.6244	5.59253
CONR	CP	ENSMUSG00000070031.11	Sp140	CP	2.49957	2.38702e-07	2.56736e-06	6.62214	5.59051
CONR	CP	ENSMUSG00000038074.16	Fkbp14	CP	1.5357	2.39314e-07	2.57249e-06	6.62103	5.58965
CONR	CP	ENSMUSG00000020077.14	Srgn	CP	2.21255	2.40157e-07	2.5801e-06	6.6195	5.58836
CONR	CP	ENSMUSG00000020838.12	Slc6a4	CP	2.14333	2.41515e-07	2.59323e-06	6.61706	5.58616
CONR	CP	ENSMUSG00000037470.14	Uggt1	CP	1.16439	2.41984e-07	2.5968e-06	6.61621	5.58556
CONR	CP	ENSMUSG00000050222.10	Il17d	CP	1.34279	2.44531e-07	2.62266e-06	6.61167	5.58126
CONR	CP	ENSMUSG00000013629.16	Cad	CP	1.23822	2.44695e-07	2.62295e-06	6.61137	5.58121
CONR	CP	ENSMUSG00000040410.14	Fbxl4	CP	1.16354	2.48484e-07	2.66207e-06	6.6047	5.57478
CONR	CP	ENSMUSG00000039899.5	Fgl2	CP	1.10971	2.4919e-07	2.66814e-06	6.60347	5.57379
CONR	CP	ENSMUSG00000072812.4	Ahnak2	CP	1.99961	2.50067e-07	2.67602e-06	6.60194	5.57251
CONR	CP	ENSMUSG00000032431.6	Crtap	CP	1.14429	2.5557e-07	2.73095e-06	6.59249	5.56369
CONR	CP	ENSMUSG00000037995.15	Igsf9	CP	2.23905	2.55629e-07	2.73095e-06	6.59239	5.56369
CONR	CP	ENSMUSG00000025651.14	Uqcrc1	CP	1.09792	2.61101e-07	2.78629e-06	6.58319	5.55497
CONR	CP	ENSMUSG00000040483.15	Xaf1	CP	2.04173	2.639e-07	2.81341e-06	6.57856	5.55077
CONR	CP	ENSMUSG00000001228.14	Uhrf1	CP	1.91033	2.63937e-07	2.81341e-06	6.5785	5.55077
CONR	CP	ENSMUSG00000008384.8	Sertad1	CP	1.80282	2.73143e-07	2.90829e-06	6.56361	5.53636
CONR	CP	ENSMUSG00000051314.11	Ffar2	CP	2.16839	2.74888e-07	2.92524e-06	6.56084	5.53384
CONR	CP	ENSMUSG00000021903.11	Galnt15	CP	1.47113	2.77443e-07	2.95079e-06	6.55683	5.53006
CONR	CP	ENSMUSG00000046157.13	Tmem229b	CP	2.01903	2.79012e-07	2.96582e-06	6.55438	5.52786
CONR	CP	ENSMUSG00000029084.5	Cd38	CP	2.09944	2.80286e-07	2.97605e-06	6.5524	5.52636
CONR	CP	ENSMUSG00000030589.15	Rasgrp4	CP	2.75784	2.82143e-07	2.99244e-06	6.54953	5.52397
CONR	CP	ENSMUSG00000031586.16	Rbpms	CP	1.74771	2.83317e-07	3.00323e-06	6.54773	5.52241
CONR	CP	ENSMUSG00000028033.16	Kcnq5	CP	1.64155	2.89028e-07	3.06037e-06	6.53906	5.51423
CONR	CP	ENSMUSG00000039747.11	Orai2	CP	1.07954	2.91362e-07	3.08337e-06	6.53557	5.51097
CONR	CP	ENSMUSG00000071073.4	Lrrc73	CP	2.11586	2.91868e-07	3.08701e-06	6.53481	5.51046
CONR	CP	ENSMUSG00000028864.7	Hgf	CP	3.13327	2.92513e-07	3.09212e-06	6.53385	5.50974
CONR	CP	ENSMUSG00000029101.14	Rgs12	CP	1.42449	3.06182e-07	3.23304e-06	6.51402	5.49039
CONR	CP	ENSMUSG00000079434.8	Neu2	CONR	2.56743	3.09447e-07	3.2639e-06	6.50941	5.48626
CONR	CP	ENSMUSG00000073700.3	Klhl21	CP	1.01627	3.10396e-07	3.27029e-06	6.50808	5.48541
CONR	CP	ENSMUSG00000034463.3	Scara3	CP	1.59091	3.14042e-07	3.30505e-06	6.50301	5.48082
CONR	CP	ENSMUSG00000041390.18	Mdfic	CP	1.04916	3.15389e-07	3.31741e-06	6.50115	5.4792
CONR	CP	ENSMUSG00000013584.5	Aldh1a2	CP	1.68099	3.17025e-07	3.33278e-06	6.49891	5.47719
CONR	CP	ENSMUSG00000057278.8	Snrpg	CP	1.66211	3.20442e-07	3.36685e-06	6.49425	5.47278
CONR	CP	ENSMUSG00000022043.18	Trim35	CP	1.41246	3.24325e-07	3.40577e-06	6.48902	5.46778
CONR	CP	ENSMUSG00000024594.8	Prrc1	CP	1.05768	3.26693e-07	3.42875e-06	6.48586	5.46486
CONR	CP	ENSMUSG00000058396.7	Gpr182	CP	2.13673	3.29544e-07	3.45487e-06	6.48209	5.46157
CONR	CP	ENSMUSG00000000552.9	Zfp385a	CP	1.12053	3.30318e-07	3.46109e-06	6.48107	5.46079
CONR	CP	ENSMUSG00000055368.14	Slc6a2	CP	2.39213	3.32942e-07	3.48476e-06	6.47763	5.45783
CONR	CP	ENSMUSG00000053175.17	Bcl3	CP	2.44902	3.3348e-07	3.48847e-06	6.47693	5.45736
CONR	CP	ENSMUSG00000030562.17	Nox4	CP	2.57226	3.33698e-07	3.48885e-06	6.47665	5.45732
CONR	CP	ENSMUSG00000076441.9	Ass1	CP	1.35016	3.35743e-07	3.49885e-06	6.47399	5.45608
CONR	CP	ENSMUSG00000078317.6	F8a	CP	1.17641	3.35754e-07	3.49885e-06	6.47398	5.45608
CONR	CP	ENSMUSG00000026548.4	Slamf9	CP	2.09297	3.35962e-07	3.4991e-06	6.47371	5.45604
CONR	CP	ENSMUSG00000001657.7	Hoxc8	CP	4.36079	3.3823e-07	3.5208e-06	6.47079	5.45336
CONR	CP	ENSMUSG00000028124.15	Gclm	CP	1.37791	3.39502e-07	3.53212e-06	6.46916	5.45197
CONR	CP	ENSMUSG00000027706.8	Sec62	CP	1.25487	3.44775e-07	3.58502e-06	6.46246	5.44551
CONR	CP	ENSMUSG00000035929.11	H2-Q4	CP	1.91457	3.47822e-07	3.61473e-06	6.45864	5.44192
CONR	CP	ENSMUSG00000024378.9	Stard4	CP	1.17588	3.48372e-07	3.61848e-06	6.45796	5.44147
CONR	CP	ENSMUSG00000026029.14	Casp8	CP	1.36811	3.49064e-07	3.6237e-06	6.45709	5.44085
CONR	CP	ENSMUSG00000029992.14	Gfpt1	CP	1.25082	3.51901e-07	3.6472e-06	6.45358	5.43804
CONR	CP	ENSMUSG00000037060.3	Cavin3	CP	1.82415	3.5418e-07	3.66883e-06	6.45078	5.43547
CONR	CP	ENSMUSG00000031451.6	Gas6	CP	1.54514	3.57145e-07	3.69754e-06	6.44716	5.43209
CONR	CP	ENSMUSG00000056481.6	Cd248	CP	1.57085	3.6559e-07	3.78086e-06	6.43701	5.42241
CONR	CP	ENSMUSG00000025139.14	Tollip	CP	1.04596	3.70584e-07	3.83044e-06	6.43111	5.41675
CONR	CP	ENSMUSG00000026353.9	Ubxn4	CP	1.10891	3.71796e-07	3.84088e-06	6.4297	5.41557
CONR	CP	ENSMUSG00000073542.2	Cep76	CP	1.25174	3.74972e-07	3.8716e-06	6.426	5.41211
CONR	CP	ENSMUSG00000040613.14	Apobec1	CP	2.6794	3.76566e-07	3.88595e-06	6.42416	5.4105
CONR	CP	ENSMUSG00000024011.16	Pi16	CP	1.52883	3.77752e-07	3.89609e-06	6.42279	5.40937
CONR	CP	ENSMUSG00000023070.6	Rgn	CP	1.97449	3.81269e-07	3.93024e-06	6.41877	5.40558
CONR	CP	ENSMUSG00000028601.18	Echdc2	CP	1.5449	3.82577e-07	3.94159e-06	6.41728	5.40433
CONR	CP	ENSMUSG00000029017.13	Pmpcb	CP	1.09779	3.87198e-07	3.98706e-06	6.41207	5.39935
CONR	CP	ENSMUSG00000002885.14	Adgre5	CP	1.91917	3.88114e-07	3.99433e-06	6.41104	5.39856
CONR	CP	ENSMUSG00000000594.7	Gm2a	CP	1.33856	3.91042e-07	4.0223e-06	6.40778	5.39553
CONR	CP	ENSMUSG00000015092.9	Edf1	CP	1.11632	3.94797e-07	4.05873e-06	6.40363	5.39161
CONR	CP	ENSMUSG00000021130.8	Galnt16	CP	1.77553	3.96092e-07	4.06985e-06	6.4022	5.39042
CONR	CP	ENSMUSG00000030409.15	Dmpk	CP	1.94748	3.97727e-07	4.08446e-06	6.40041	5.38887
CONR	CP	ENSMUSG00000028551.14	Cdkn2c	CP	1.45505	4.00455e-07	4.11026e-06	6.39745	5.38613
CONR	CP	ENSMUSG00000061273.3	Mmgt1	CP	1.02549	4.00677e-07	4.11033e-06	6.39721	5.38612
CONR	CP	ENSMUSG00000031889.9	D230025D16Rik	CP	1.04096	4.04199e-07	4.14423e-06	6.3934	5.38256
CONR	CP	ENSMUSG00000056091.12	St3gal5	CP	1.52735	4.04583e-07	4.14594e-06	6.39299	5.38238
CONR	CP	ENSMUSG00000033192.5	Lpcat2	CP	2.22977	4.05361e-07	4.15169e-06	6.39216	5.38178
CONR	CP	ENSMUSG00000026463.17	Atp2b4	CP	1.42414	4.05972e-07	4.15572e-06	6.3915	5.38135
CONR	CP	ENSMUSG00000079508.8	Apoo	CP	1.11483	4.09477e-07	4.18935e-06	6.38777	5.37785
CONR	CP	ENSMUSG00000026735.2	Ptf1a	CP	2.19854	4.20456e-07	4.29937e-06	6.37628	5.3666
CONR	CP	ENSMUSG00000020674.17	Pxdn	CP	1.16994	4.28675e-07	4.38106e-06	6.36787	5.35842
CONR	CP	ENSMUSG00000063049.4	Ing2	CP	1.25172	4.30727e-07	4.39969e-06	6.3658	5.35658
CONR	CP	ENSMUSG00000000693.10	Loxl3	CP	1.57873	4.32139e-07	4.41175e-06	6.36438	5.35539
CONR	CP	ENSMUSG00000036019.8	Tmtc2	CP	1.15639	4.32642e-07	4.41452e-06	6.36387	5.35512
CONR	CP	ENSMUSG00000030966.13	Trim21	CP	1.73995	4.32937e-07	4.41517e-06	6.36358	5.35505
CONR	CP	ENSMUSG00000005069.12	Pex5	CP	1.28441	4.35679e-07	4.44024e-06	6.36083	5.35259
CONR	CP	ENSMUSG00000015354.8	Pcolce2	CP	1.61649	4.3586e-07	4.44024e-06	6.36065	5.35259
CONR	CP	ENSMUSG00000030762.11	Aqp8	CP	1.74896	4.37032e-07	4.4498e-06	6.35949	5.35166
CONR	CP	ENSMUSG00000017830.15	Dhx58	CP	1.61775	4.39184e-07	4.46933e-06	6.35735	5.34976
CONR	CP	ENSMUSG00000022836.10	Mylk	CP	2.29597	4.40239e-07	4.47768e-06	6.35631	5.34895
CONR	CP	ENSMUSG00000014905.4	Dnajb9	CP	1.20548	4.411e-07	4.48405e-06	6.35546	5.34833
CONR	CP	ENSMUSG00000078920.3	Ifi47	CP	2.19591	4.45219e-07	4.52351e-06	6.35143	5.34452
CONR	CP	ENSMUSG00000038481.13	Cdk19	CP	1.45773	4.4596e-07	4.52819e-06	6.3507	5.34408
CONR	CP	ENSMUSG00000015355.13	Cd48	CP	2.40061	4.48248e-07	4.54461e-06	6.34848	5.3425
CONR	CP	ENSMUSG00000030541.16	Idh2	CP	1.19042	4.56207e-07	4.6204e-06	6.34084	5.33532
CONR	CP	ENSMUSG00000028416.12	Bag1	CP	1.15197	4.5982e-07	4.65452e-06	6.33741	5.33212
CONR	CP	ENSMUSG00000037921.15	Ddx60	CP	2.57341	4.68562e-07	4.7405e-06	6.32923	5.32418
CONR	CP	ENSMUSG00000048779.5	P2ry6	CP	1.63208	4.88812e-07	4.94013e-06	6.31086	5.30626
CONR	CP	ENSMUSG00000026586.16	Prrx1	CP	1.74136	5.05122e-07	5.10226e-06	6.2966	5.29224
CONR	CP	ENSMUSG00000061306.15	Slc38a10	CP	1.16709	5.09465e-07	5.14341e-06	6.29289	5.28875
CONR	CP	ENSMUSG00000026189.13	Pecr	CP	1.32998	5.10865e-07	5.15482e-06	6.29169	5.28779
CONR	CP	ENSMUSG00000012428.9	Steap4	CP	1.45152	5.13224e-07	5.17589e-06	6.28969	5.28602
CONR	CP	ENSMUSG00000016552.13	Foxred2	CP	1.22996	5.13786e-07	5.17883e-06	6.28922	5.28577
CONR	CP	ENSMUSG00000025407.7	Gli1	CP	1.81209	5.19009e-07	5.22871e-06	6.28482	5.28161
CONR	CP	ENSMUSG00000105504.4	Gbp5	CP	1.9547	5.20764e-07	5.24362e-06	6.28336	5.28037
[truncated: 8,594 more rows]
